# Supplementary material for: Humans vs. Fungi: An Overview of Fungal Pathogens against Humans
Source: MDPI journal article supplement (doi:10.3390/pathogens13050426), 2024-05-17
Supplement: s1 [file s1]

**Supplementary Table 2** A synopsis of human fungal pathogens and relevant disease conditions extracted from case studies.

| Current Name                       | Fungal Pathogen                      | Disease or medical condition           | Site/tissue of infection                          | Origin                                   | References                                                                                                                                                                                                                    |
|------------------------------------|--------------------------------------|----------------------------------------|---------------------------------------------------|------------------------------------------|-------------------------------------------------------------------------------------------------------------------------------------------------------------------------------------------------------------------------------|
| <i>Acremonium egyptiacum</i>       | <i>Acremonium sclerotigenum</i>      | Onychomycosis                          | Toenail                                           | France & Netherlands                     | <a href="#">Perdomo et al. 2011</a>                                                                                                                                                                                           |
| <i>Acremonium potronii</i>         | <i>Acremonium potronii</i>           | Keratitis                              | left eye                                          | Spain                                    | Rodriguez-Ares et al. 2000                                                                                                                                                                                                    |
|                                    |                                      | Pneumonia                              | lungs                                             | Turkey                                   | Civelek et al. 2016                                                                                                                                                                                                           |
| <i>Albifimbria verrucaria</i>      | <i>Myrothecium verrucaria</i>        | Keratomycosis                          | eye                                               | China & India                            | Rameshkumar et al. 2019, Liu et al. 2021                                                                                                                                                                                      |
| <i>Allocanariomyces americanus</i> | <i>Pseudocanariomyces americanus</i> | Prosthetic hipinfection                | hip                                               | USA                                      | <a href="#">Ryan et al. 2021</a>                                                                                                                                                                                              |
|                                    |                                      | Prosthetic Hip Infection               | hip                                               | USA                                      | <a href="#">Ryan et al. 2021</a>                                                                                                                                                                                              |
| <i>Alternaria Alternata</i>        | <i>Alternaria Alternata</i>          | Cutaneous phaeohyphomycosis,           | right knee                                        | Italy, Germany                           | Mayser et al. 2002, Farina et al. 2007                                                                                                                                                                                        |
|                                    |                                      | Soft tissue infection                  | thigh                                             | Austria                                  | Bonatti et al. 2007                                                                                                                                                                                                           |
|                                    |                                      | Keratomycosis                          | eye                                               | Malta                                    | Zahra et al. 2002                                                                                                                                                                                                             |
|                                    |                                      | Keratitis                              | eye                                               | Greece                                   | Konidaris et al. 2013                                                                                                                                                                                                         |
|                                    |                                      | Cutaneous phaeohyphomycosis            | left hand and wrist                               | Italy                                    | Romano et al. 1997                                                                                                                                                                                                            |
|                                    |                                      | Osteomyelitis                          | maxilla                                           | India                                    | Chhabra et al. 2013                                                                                                                                                                                                           |
|                                    |                                      | Bronchopulmonary mycosis               | Lungs                                             | India                                    | Chowdhary et al. 2012                                                                                                                                                                                                         |
|                                    |                                      | Eosinophilic pneumonia                 | lungs                                             | Japan                                    | Ogawa et al. 1997                                                                                                                                                                                                             |
| <i>Alternaria chlamydospora</i>    | <i>Alternaria chlamydospora</i>      | malignant otitis externa               | ear                                               | Greece                                   | Korres et al. 2015                                                                                                                                                                                                            |
|                                    |                                      | Ungual and cutaneous phaeohyphomycosis | toenail and the plantar area of the toe           | India                                    | Singh et al. 1990                                                                                                                                                                                                             |
| <i>Alternaria infectoria</i>       | <i>Alternaria infectoria</i>         | Cutaneous phaeohyphomycosis            | right forearm, right leg, right knee & right foot | France, Germany, Netherlands, & Portugal | <a href="#">Dubois et al. 2005</a> , <a href="#">Nulens et al. 2006</a> , <a href="#">Brasch et al. 2008</a> , <a href="#">Cunha et al. 2012</a> , <a href="#">Robert et al. 2012</a> , <a href="#">Kieselová et al. 2021</a> |
|                                    |                                      | Cutaneous infection                    | right arm, third finger of the right hand, & legs | Italy, & Portugal                        | <a href="#">Lo Cascio et al. 2004</a> , Ara et al. 2006, Lopes et al. 2013                                                                                                                                                    |
|                                    |                                      | Invasive Rhinosinusitis                | nose                                              | France                                   | <a href="#">Paccoud et al. 2022</a>                                                                                                                                                                                           |

|                                     |                                      |                                             |                                                                                                         |                |                                                                      |
|-------------------------------------|--------------------------------------|---------------------------------------------|---------------------------------------------------------------------------------------------------------|----------------|----------------------------------------------------------------------|
|                                     |                                      | Phaeohyphomycotic brain abscess             | brain                                                                                                   | Portugal       | <a href="#">Hipolito et al. 2009</a>                                 |
|                                     |                                      | Posttraumatic keratitis and endophthalmitis | eye                                                                                                     | Spain          | <a href="#">Ferrer et al. 2003</a>                                   |
| <i>Alternaria longipes</i>          | <i>Alternaria longipes</i>           | Cutaneous phaeohyphomycosis                 | left forearm & right foot                                                                               | Spain          | Gene et al. 1995                                                     |
| <i>Alternaria tenuissima</i>        | <i>Alternaria tenuissima</i>         | cutaneous phaeohyphomycosis,                | right leg                                                                                               | Italy          | Romano et al. 1997                                                   |
|                                     |                                      | Cutaneous infection                         | right knee                                                                                              | UK             | Robertshaw and Higgins 2005                                          |
|                                     |                                      | Cutaneous phaeohyphomycosis                 | left elbow                                                                                              | Italy          | Romano et al. 1996                                                   |
| <i>Amesia atrobrunnea</i>           | <i>Chaetomium atrobrunneum</i>       | Cerebral abscess                            | left parietal lobe                                                                                      | USA            | Guppy et al. 1998                                                    |
|                                     |                                      | Eumycetoma                                  | left foot                                                                                               | Sudan          | <a href="#">Mhmoud et al. 2019</a>                                   |
|                                     |                                      | Keratitis                                   | surface epithelium of the cornea, eyelid                                                                | india , china  | <a href="#">Balne et al. 2012, Zhang et al. 2010</a>                 |
|                                     |                                      | Cerebral abscess                            | left parietal lobe,                                                                                     | USA            | Guppy et al. 1998                                                    |
|                                     |                                      | Eumycetoma                                  | left foot                                                                                               | Sudan          | <a href="#">Mhmoud et al. 2019</a>                                   |
|                                     |                                      | Fungal Keratitis                            | surface epithelium of the cornea, eyelid                                                                | india , china  | <a href="#">Balne et al. 2012, Zhang et al. 2010</a>                 |
| <i>Apiotrichum loubieri</i>         | <i>Trichosporon loubieri</i>         | Disseminated infection                      | blood                                                                                                   | spleen & liver | <a href="#">Marty et al. 2003</a>                                    |
|                                     |                                      | Urinary tract infection                     | Urinary tract                                                                                           | India          | <a href="#">Premamalini et al. 2019</a>                              |
|                                     |                                      | Kidney infection                            | Kidney                                                                                                  | India          | <a href="#">Padhye et al. 2003</a>                                   |
|                                     |                                      | Fungemia                                    | blood                                                                                                   | USA            | Bhaskaran et al. 2016                                                |
|                                     |                                      | bloodstream infection                       | lungs & spleen                                                                                          | China          | <a href="#">Hu et al. 2021</a>                                       |
| <i>Apiotrichum mycotoxinovorans</i> | <i>Trichosporon mycotoxinivorans</i> | Disseminated Infections                     | respiratory tract                                                                                       | USA            | Shah et al. 2014                                                     |
| <i>Apophysomyces elegans</i>        | <i>Apophysomyces elegans</i>         | Posttraumatic Necrotizing Fasciitis         | left arm & right clavicle                                                                               | Saudi Arabia   | Kordy et al. 2004                                                    |
|                                     |                                      | Cutaneous infection                         | left upper arm                                                                                          | India          | Chakrabarti et al. 1997                                              |
|                                     |                                      | Rhino-Orbitocerebral infection              | right eye, right maxillary sinus, right maxillary region, infraorbital foramen, floor of orbit, & right | India & USA    | Garcia-Covarrubias et al. 2001, Liang et al. 2006, Parsi et al. 2013 |

|                                    |                                    |                                               |                                                                                                        |                       |                                                                              |
|------------------------------------|------------------------------------|-----------------------------------------------|--------------------------------------------------------------------------------------------------------|-----------------------|------------------------------------------------------------------------------|
|                                    |                                    |                                               | cavernous sinus                                                                                        |                       |                                                                              |
|                                    |                                    | Osteomyelitis                                 | left humerus & sternum                                                                                 | Georgia & Netherlands | Eaton et al. 1994, Meis et al. 1994                                          |
|                                    |                                    | Sinoorbital infections                        | frontal, maxillary, ethmoid, & sphenoid sinuses                                                        | India                 | Rao et al. 2006                                                              |
|                                    |                                    | Renal infection                               | right kidney                                                                                           | India                 | Okhuysen et al. 1994, Thomas et al. 2008                                     |
| <i>Apophysomyces ossiformis</i>    | <i>Apophysomyces ossiformis</i>    | Rhino-orbital infection                       | left eye & maxillary sinuses                                                                           | Mexico                | <a href="#">Martínez-Herrera et al. 2020</a>                                 |
| <i>Apophysomyces trapeziformis</i> | <i>Apophysomyces trapeziformis</i> | Necrotizing soft tissue infection             | right arm                                                                                              | USA                   | <a href="#">Echaiz et al. 2013</a>                                           |
|                                    |                                    | Septic arthritis                              | left knee                                                                                              | USA                   | <a href="#">Bertumen et al. 2016</a>                                         |
|                                    |                                    | Necrotizing Cutaneous infection               | flank, legs, scalp, thigh & hip                                                                        | USA                   | <a href="#">Neblett Fanfair et al. 2012</a>                                  |
| <i>Apophysomyces variabilis</i>    | <i>Apophysomyces variabilis</i>    | Chronic orbital and calvarial infection       | left eye, calvarial bone, & left maxillary bone                                                        | USA                   | Wolkow et al. 2017                                                           |
|                                    |                                    | Necrotizing fasciitis                         | upper & lateral region of thigh and right gluteus to the upper region of the left gluteus, & right leg | Colombia & India      | <a href="#">Rodríguez et al. 2018</a> , <a href="#">Samaddar et al. 2019</a> |
|                                    |                                    | Cutaneous infection                           | left leg                                                                                               | Saudi Arabia          | <a href="#">Al-Zaydani et al. 2015</a>                                       |
|                                    |                                    | Maxillary Osteomyelitis                       | maxilla                                                                                                | India                 | <a href="#">Sharma et al. 2014</a>                                           |
|                                    |                                    | Unrecognized Infection                        | _                                                                                                      | Australia             | <a href="#">Boan et al. 2022</a>                                             |
| <i>Arthrographis kalrae</i>        | <i>Arthrographis kalrae</i>        | Mycetoma                                      | left hand                                                                                              | France                | Degavre et al. 1997                                                          |
| <i>Aspergillus calidoustus</i>     | <i>Aspergillus calidoustus</i>     | Pulmonary infections                          | lungs                                                                                                  | Canada                | Egli et al. 2012                                                             |
|                                    |                                    | Mediastinitis                                 | mediastinum                                                                                            | USA                   | Elsawy et al. 2015                                                           |
|                                    |                                    | Intestinal mycosis                            | colon                                                                                                  | Japan                 | Kaneko et al. 2018                                                           |
|                                    |                                    | Disseminated infection                        | brain, skin, & lung                                                                                    | USA                   | CamMendoza et al. 2020, Camargo et al. 2022                                  |
|                                    |                                    | Pulmonary infection                           | lungs                                                                                                  | Spain                 | <a href="#">Pelaez et al. 2013</a>                                           |
| <i>Aspergillus felis</i>           | <i>Aspergillus felis</i>           | Pulmonary aspergillosis                       | lungs                                                                                                  | Japan & Spain         | <a href="#">Barrs et al. 2013</a> , Yamairi et al. 2019                      |
|                                    |                                    | Invasive pulmonary aspergillosis and allergic | lungs                                                                                                  | France                | Paccoud et al. 2019                                                          |

|                               |                               |                                                                                     |                                                                                       |                        |                                                                                                                                                         |
|-------------------------------|-------------------------------|-------------------------------------------------------------------------------------|---------------------------------------------------------------------------------------|------------------------|---------------------------------------------------------------------------------------------------------------------------------------------------------|
|                               |                               | bronchopulmonary aspergillosis                                                      |                                                                                       |                        |                                                                                                                                                         |
|                               |                               | Invasive rhinosinusitis with secondary cerebral abscesses                           | brain, clivus                                                                         | Australia              | Parkes-Smith et al. 2022                                                                                                                                |
|                               |                               | Cranial aspergillosis                                                               | brain (left parieto-temporal region)                                                  | Australia              | Beresford et al. 2019                                                                                                                                   |
| <i>Aspergillus fischeri</i>   | <i>Aspergillus fischeri</i>   | Pneumonia                                                                           | lungs                                                                                 | Hong Kong              | Chim et al. 1998                                                                                                                                        |
|                               |                               | Disseminated infection                                                              | lung, heart, spleen, thyroid, skin, & brain                                           | USA                    | Lonial et al. 1997                                                                                                                                      |
|                               |                               | Skin graft infection                                                                | upper right extremity                                                                 | Czech Republic         | <a href="#">Lipový et al. 2021</a>                                                                                                                      |
| <i>Aspergillus flavus</i>     | <i>Aspergillus flavus</i>     | Keratitis                                                                           | eye                                                                                   | India                  | Sridhar et al. 2000                                                                                                                                     |
|                               |                               | Endocarditis                                                                        | mitral valve, right ventricular wall and near the mitral and tricuspid valve leaflets | France & UK            | Kennedy et al. 1998, Demaria et al. 2000, Rao and Saha 2000, Irles et al. 2004                                                                          |
|                               |                               | Endocarditis & meningitis,                                                          | anterior mitral leaflet hinge point, atrial septum                                    | Iran                   | Fattahi et al. 2020                                                                                                                                     |
|                               |                               | Invasive stomatitis                                                                 | oral cavity                                                                           | Japan                  | <a href="#">Myoken et al. 2003</a>                                                                                                                      |
|                               |                               | Anuria                                                                              | ureters                                                                               | USA                    | Kueter et al. 2002                                                                                                                                      |
|                               |                               | Cutaneous aspergillosis                                                             | abdominal skin                                                                        | USA                    | James et al. 2000                                                                                                                                       |
|                               |                               | Isolated nasopharyngeal aspergillosis                                               | nasopharynx                                                                           | USA                    | Dogan et al. 2004                                                                                                                                       |
|                               |                               | Eumycetoma                                                                          | left foot                                                                             | Sudan                  | <a href="#">Ahmed et al. 2015</a>                                                                                                                       |
| <i>Aspergillus fumigatus</i>  | <i>Aspergillus fumigatus</i>  | Invasive aspergillosis                                                              | lungs, sinuses, & brain                                                               | France                 | Pinel et al. 2003                                                                                                                                       |
| <i>Aspergillus granulosis</i> | <i>Aspergillus granulosis</i> | Disseminated skin infection                                                         | right arm & right leg                                                                 | USA                    | Fakih et al. 1995                                                                                                                                       |
| <i>Aspergillus lentulus</i>   | <i>Aspergillus lentulus</i>   | Invasive pulmonary aspergillosis                                                    | lungs                                                                                 | Brazil, China, & Japan | <a href="#">de Azevedo Bastos et al. 2015</a> , <a href="#">Yoshida et al. 2015</a> , <a href="#">Yagi et al. 2019</a> , <a href="#">Yu et al. 2020</a> |
|                               |                               | Pneumonia                                                                           | right lung                                                                            | Turkey                 | <a href="#">Gürcan et al. 2013</a>                                                                                                                      |
|                               |                               | Disseminated infection (pulmonary disease, endophthalmitis, and a cerebral abscess) | brain, lungs, & eye                                                                   | Australia              | Shivasabesan et al. 2022                                                                                                                                |

|                                    |                                    |                                             |                                             |                       |                                                                  |
|------------------------------------|------------------------------------|---------------------------------------------|---------------------------------------------|-----------------------|------------------------------------------------------------------|
| <i>Aspergillus nidulans</i>        | <i>Aspergillus nidulans</i>        | Vertebral osteomyelitis and epidural absces | cervicothoracic spine                       | China                 | Jiang et al. 2013                                                |
|                                    |                                    | Invasive aspergillosis                      | spinal cord                                 | Iran                  | <a href="#">Tavakoli et al. 2020</a>                             |
|                                    |                                    | Osteomyelitis                               | left femur                                  | Greece                | Dotis et al. 2003                                                |
|                                    |                                    | White granule mycetoma                      | right foot and leg                          | India                 | Prasanna et al. 2016                                             |
|                                    |                                    | Brain infection                             | brain                                       | India                 | Chakrabarti et al. 2006                                          |
|                                    |                                    | Spinal cord infection                       | spinal cord                                 | Saudi Arabia          | Bukhari and Alrabiaah 2009                                       |
| <i>Aspergillus niger</i>           | <i>Aspergillus niger</i>           | Aspergillosis                               | lungs                                       | Belgium, Italy, & USA | Fianchi et al. 2004, Person et al. 2010, Vermeulen et al. 2014   |
|                                    |                                    | Onychomycosis                               | Fingernails                                 | South Korea           | Kim et al. 2012                                                  |
|                                    |                                    | Disseminated infection                      | liver, skin, spleen, sclera, inguinal sites | Turkey                | Ergene et al. 2013                                               |
| <i>Aspergillus novofumigatus</i>   | <i>Aspergillus novofumigatus</i>   | Invasive pulmonary aspergillosis            | lungs                                       | Spain                 | <a href="#">Pelaez et al. 2013</a>                               |
| <i>Aspergillus pseudodeflectus</i> | <i>Aspergillus pseudodeflectus</i> | Invasive Pulmonary aspergillosis            | lungs                                       | France                | <a href="#">Aït-Ammar et al. 2018</a>                            |
| <i>Aspergillus reptans</i>         | <i>Aspergillus repens</i>          | Onychomycosis                               | toe-nails of left foot                      | Korea                 | Lee et al. 1981                                                  |
| <i>Aspergillus terreus</i>         | <i>Aspergillus terreus</i>         | Pulmonary aspergillosis                     | lungs                                       | Iran & UK             | Iwen et al. 1998, Steinbach et al. 2004, Abolghasemi et al. 2021 |
|                                    |                                    | Aneurysm                                    | aortic arch                                 | USA                   | Silva et al. 2000                                                |
|                                    |                                    | Sinusitis                                   | paranasal sinuses                           | Morocco               | Akhaddar et al. 2008                                             |
|                                    |                                    | Meningitis                                  | ethmoidal, sphenoid, and maxillary sinuses  | Saudi Arabia          | Elsawy et al. 2015                                               |
|                                    |                                    | Spondylodiscitis                            | spine                                       | France                | Comacle et al. 2016                                              |
|                                    |                                    | Hip joint infection                         | hip joint                                   | USA                   | Bartash et al. 2017                                              |
|                                    |                                    | Cutaneous infection                         | left leg                                    | Turkey                | Ozer et al. 2009                                                 |
| <i>Aspergillus udagawae</i>        | <i>Aspergillus udagawae</i>        | Bronchial aspergillosis                     | Right bronchus                              | Japan                 | <a href="#">Gyotoku et al. 2012</a>                              |
|                                    |                                    | Endocarditis                                | posterior leaflet of the mitral valve       | Japan                 | Seki et al. 2017                                                 |
|                                    | <i>Neosartorya udagawae</i>        | Pneumonia and Dissaminated infection        | lungs, chest wall, & liver                  | USA                   | Vinh et al. 2009a                                                |
| <i>Aspergillus ustus</i>           | <i>Aspergillus ustus</i>           | Cutaneous infection                         | right cheek, right leg, & left wrist        | Japan, Spain, & USA   | Gené et al. 2001, Nakai et al. 2002, Vagefi et al. 2008          |
|                                    |                                    | Disseminated infection                      | left arm                                    | USA                   | Olorunnipa et al. 2010                                           |
|                                    |                                    | Cerebral aspergillosis                      | brain                                       | USA                   | Florescu et al. 2009                                             |

|                                  |                                  |                                |                                                                        |              |                                                                |
|----------------------------------|----------------------------------|--------------------------------|------------------------------------------------------------------------|--------------|----------------------------------------------------------------|
|                                  |                                  | Endophthalmitis                | eye                                                                    | USA          | Taner Yildiran et al. 2006                                     |
| <i>Aspergillus viridinutans</i>  | <i>Aspergillus viridinutans</i>  | Disseminated infection         | superior vena cava and anterior pericardium, lungs,diaphragm, & spleen | USA          | Vinh et al. 2009                                               |
|                                  |                                  | Keratomycosis                  | eye (contact lens)                                                     | Japan        | <a href="#">Shigeyasu et al. 2012</a>                          |
|                                  |                                  | Lung infection                 | left lower lobe                                                        | Japan        | <a href="#">Kitaura et al. 2014</a>                            |
|                                  |                                  | Chronic invasive aspergillosis | upper lobe of the right lung                                           | Portugal     | Coelho et al. 2011                                             |
| <i>Aureobasidium melanogenum</i> | <i>Aureobasidium melanogenum</i> | Superficial Phaeohyphomycosis  | skin                                                                   | Taiwan       | <a href="#">Chen et al. 2016</a>                               |
|                                  |                                  | Neonatal fungemia              | blood                                                                  | India        | <a href="#">Samaddar et al. 2023</a>                           |
|                                  |                                  | Bloodstream infection          | blood                                                                  | Japan        | <a href="#">Yamamoto et al. 2022</a>                           |
|                                  |                                  | Superficial Phaeohyphomycosis  | skin                                                                   | Taiwan       | <a href="#">Chen et al. 2016</a>                               |
|                                  |                                  | Neonatal fungemia              | blood                                                                  | India        | <a href="#">Samaddar et al. 2023</a>                           |
|                                  |                                  | Bloodstream infection          | blood                                                                  | Japan        | <a href="#">Yamamoto et al. 2022</a>                           |
| <i>Aureobasidium proteae</i>     | <i>Aureobasidium proteae</i>     | Chronic fungal meningitis      | brain                                                                  | Croatia      | Kutleša et al. 2012                                            |
|                                  |                                  | Chronic fungal meningitis      | brain                                                                  | Croatia      | Kutleša et al. 2012                                            |
| <i>Aureobasidium pullulans</i>   | <i>Aureobasidium pullulans</i>   | Fungemia                       | blood                                                                  | canada       | <a href="#">Hawkes et al. 2005</a>                             |
|                                  |                                  | Peritonitis                    | peritoneal fluid                                                       | Japan        | Mise et al. 2008                                               |
|                                  |                                  | Septicemia                     | blood, catheter tip                                                    | Taiwan       | <a href="#">Huang et al. 2008</a>                              |
|                                  |                                  | Fungemia                       | blood                                                                  | canada       | <a href="#">Hawkes et al. 2005</a>                             |
|                                  |                                  | Peritonitis                    | peritoneal fluid                                                       | Japan        | Mise et al. 2008                                               |
|                                  |                                  | Septicemia                     | blood, catheter tip                                                    | Taiwan       | <a href="#">Huang et al. 2008</a>                              |
| <i>Basidiobolus ranarum</i>      | <i>Basidiobolus ranarum</i>      | Subcutaneous infection         | left thigh & buttocks                                                  | India        | Sujatha et al. 2003, Anand et al. 2010, Mendiratta et al. 2012 |
|                                  |                                  | Entomophthoromycosis           | abdomen                                                                | Australia    | Davis et al. 1994                                              |
|                                  |                                  | Gastrointestinal infection     | cecum, appendix, right colon, liver, & abdominal lymph nodes           | Saudi Arabia | Yusuf et al. 2003                                              |
|                                  |                                  | Retroperitoneal infection      | upper abdomen                                                          | Pakistan     | Nazir et al. 1997                                              |

|                                |                                 |                                                        |                                                                                     |                                      |                                                                                                                                                           |
|--------------------------------|---------------------------------|--------------------------------------------------------|-------------------------------------------------------------------------------------|--------------------------------------|-----------------------------------------------------------------------------------------------------------------------------------------------------------|
| <i>Blastomyces gilchristii</i> | <i>Blastomyces gilchristii</i>  | Blastomycosis, acute respiratory distress syndrome     | lungs                                                                               | Canada                               | <a href="#">Dalcin et al. 2016</a>                                                                                                                        |
|                                | <i>Blastomyces dermatitidis</i> | Osteomyelitis, USA                                     | elbow, Left distal femur, right proximal radius, manubrium & sternoclavicular joint | USA                                  | Saiz et al. 2004                                                                                                                                          |
|                                |                                 | otitis media                                           | middle ear                                                                          | USA                                  | Istorico et al. 1992                                                                                                                                      |
|                                |                                 | Meningoencephalitis & central nervous system infection | CNS                                                                                 | Canada & USA                         | Hardjasudarma et al. 1995, Wylen and Nanda 1999, Friedman et al. 2000, Chowfin et al. 2000, Madigan et al. 2017, Walkty et al. 2018, Slomka and Doub 2020 |
|                                |                                 | endophthalmitis & Orbital cellulitis                   | eye                                                                                 | Canada & USA                         | Safneck et al. 1990, Li et al. 1998                                                                                                                       |
|                                |                                 | Cutaneous infections                                   | scalp, forehead, neck, and ears, trunk, right leg and proximal extremities          | Canada, Tunisia, South Africa, & USA | Ross and Keeling 2000, Walker et al. 2002, Motswaledi et al. 2012, Salem et al. 2017                                                                      |
|                                |                                 | Optic Neuropathy                                       | left eye                                                                            | USA                                  | Pariseau et al. 2007                                                                                                                                      |
|                                |                                 | Laryngeal Blastomycosis                                | vocal folds                                                                         | Georgia & USA                        | Ebeo et al. 2002, Ballestas et al. 2020                                                                                                                   |
|                                |                                 | Genitourinary tract infection                          | genitourinary tract                                                                 | USA                                  | Eickenberg et al. 1975, Vahidi et al. 2018                                                                                                                |
|                                |                                 | Meningitis                                             | brain                                                                               | USA                                  | Brown et al. 2015                                                                                                                                         |
|                                |                                 | Pulmonary blastomycosis                                | lungs                                                                               | India, Mexico, & USA                 | Randhawa et al. 1983, Guccion et al. 1996, De Groote et al. 2000, Velázquez et al. 2003                                                                   |
|                                |                                 | Cholangitis                                            | bile ducts                                                                          | USA                                  | Ryan et al. 1989                                                                                                                                          |
|                                |                                 | Splenic abscess                                        | spleen                                                                              | Canada                               | MacDonald et al. 1992                                                                                                                                     |
|                                |                                 | Peritonitis                                            | abdomen                                                                             | USA                                  | Barocas and Gauthier 2014                                                                                                                                 |
| <i>Blastomyces emzantsi</i>    | <i>Blastomyces emzantsi</i>     | Blastomycosis                                          | lungs, vertebrae, & skin                                                            | South Africa                         | <a href="#">Maphanga et al. 2020</a>                                                                                                                      |
| <i>Blastomyces helicus</i>     | <i>Blastomyces helicus</i>      | Pulmonary and Systemic Disease                         | lungs, CNS, & blood                                                                 | USA                                  | <a href="#">Schwartz et al. 2019</a>                                                                                                                      |
| <i>Blastomyces parvus</i>      | <i>Chrysosporium parvum</i>     | Keratomycosis                                          | left eye                                                                            | USA                                  | Wagoner et al. 1999                                                                                                                                       |
|                                |                                 | Endophthalmitis                                        | right eye                                                                           | South Korea                          | Park et al. 2006                                                                                                                                          |



|                                |                                |                                                    |                                                                                                         |                                                                                                               |                                                                                                                                                                                                                                                                                                                                                                                                                                                                                                                                                                                   |
|--------------------------------|--------------------------------|----------------------------------------------------|---------------------------------------------------------------------------------------------------------|---------------------------------------------------------------------------------------------------------------|-----------------------------------------------------------------------------------------------------------------------------------------------------------------------------------------------------------------------------------------------------------------------------------------------------------------------------------------------------------------------------------------------------------------------------------------------------------------------------------------------------------------------------------------------------------------------------------|
| <i>Blastomyces percursorus</i> | <i>Blastomyces percursorus</i> | Blastomycosis                                      | tongue, lungs,<br>cutaneous lesions,<br>ver, lymph<br>nodes, kidney, brain,<br>& spleen                 | Angola, Morocco,<br>Mozambique, South<br>Africa, & Uganda                                                     | <a href="#">Maphanga et al. 2020</a> , <a href="#">Schwartz et al. 2021</a>                                                                                                                                                                                                                                                                                                                                                                                                                                                                                                       |
| <i>Candida albicans</i>        | <i>Candida albicans</i>        | Candidemia                                         | blood                                                                                                   | Japan, USA                                                                                                    | Bodey et al. 2002, Nakamura and Takahashi 2006,<br>Chow et al. 2008                                                                                                                                                                                                                                                                                                                                                                                                                                                                                                               |
|                                |                                | Sternal osteomyelitis                              | sternum                                                                                                 | Greece                                                                                                        | Petrikkos et al. 2001                                                                                                                                                                                                                                                                                                                                                                                                                                                                                                                                                             |
|                                |                                | Endocarditis                                       | ventricular<br>endocardium                                                                              | France                                                                                                        | Roger et al. 2000                                                                                                                                                                                                                                                                                                                                                                                                                                                                                                                                                                 |
|                                |                                | Pacemaker endocarditis                             | right atrium                                                                                            | France                                                                                                        | Joly et al. 1997                                                                                                                                                                                                                                                                                                                                                                                                                                                                                                                                                                  |
|                                |                                | Mycotic arteritis                                  | arterial walls                                                                                          | France                                                                                                        | Mai et al. 2006                                                                                                                                                                                                                                                                                                                                                                                                                                                                                                                                                                   |
|                                |                                | Vulvovaginal candidiasis                           | vagina                                                                                                  | USA                                                                                                           | Geiger et al. 1995                                                                                                                                                                                                                                                                                                                                                                                                                                                                                                                                                                |
|                                |                                | Osteomyelitis                                      | talus                                                                                                   | Venezuela                                                                                                     | Arias et al. 2004                                                                                                                                                                                                                                                                                                                                                                                                                                                                                                                                                                 |
|                                |                                | Vertebral osteomyelitis and<br>Diskitis            | Vertebral column                                                                                        | France, UK & USA                                                                                              | Hennequin et al. 1996, Miller and Mejicano 2001,<br>Parry et al. 2001, Khazim et al. 2006                                                                                                                                                                                                                                                                                                                                                                                                                                                                                         |
| <i>Candida auris</i>           | <i>Candida auris</i>           | Ear infection                                      | external ear canal                                                                                      | Japan & USA                                                                                                   | <a href="#">Satoh et al. 2009</a> , Vallabhaneni et al. 2016, Ruiz &<br>Lorenz 2021                                                                                                                                                                                                                                                                                                                                                                                                                                                                                               |
|                                |                                | Fungaemia                                          | blood                                                                                                   | Colombia, India,<br>Kuwait, Netherlands,<br>Oman, Pakistan, South<br>Africa, South Korea,<br>Spain, UK, & USA | <a href="#">Lee et al. 2011</a> , <a href="#">Magobo et al. 2014</a> , <a href="#">Emara et al. 2015</a> , <a href="#">Calvo et al. 2016</a> , <a href="#">Schelenz et al. 2016</a> ,<br>Vallabhaneni et al. 2016, <a href="#">Gaitán et al. 2017</a> , <a href="#">Mohsin et al. 2017</a> , <a href="#">Rudramurthy et al. 2017</a> , <a href="#">Adams et al. 2018</a> , <a href="#">Govender et al. 2018</a> , <a href="#">Mathur et al. 2018</a> ,<br><a href="#">Parra-Giraldo et al. 2018</a> , <a href="#">Vogelzang et al. 2019</a> ,<br><a href="#">Moin et al. 2021</a> |
|                                |                                | Otomastoiditis                                     | temporal bones                                                                                          | South Korea                                                                                                   | <a href="#">Choi et al. 2017</a>                                                                                                                                                                                                                                                                                                                                                                                                                                                                                                                                                  |
|                                |                                | Disseminated infections                            | blood, urine and<br>tracheal aspirate,<br>central line tip,<br>respiratory tract, &<br>skin             | Lebanon, Oman,<br>Russia, & USA                                                                               | Vallabhaneni et al. 2016, <a href="#">Barantsevich et al. 2019</a> ,<br>Al-Rashdi et al. 2021, Allaw et al. 2021                                                                                                                                                                                                                                                                                                                                                                                                                                                                  |
|                                |                                | Pneumonia, fungaemia, &<br>disseminated infections | blood, axilla,<br>respiratory tract,<br>groin, auditory<br>canal, urinary tract,<br>throat, urine, nose | Qatar, & Switzerland                                                                                          | Riat et al. 2018, <a href="#">Shaukat et al. 2021</a>                                                                                                                                                                                                                                                                                                                                                                                                                                                                                                                             |
| <i>Candida dubliniensis</i>    | <i>Candida dubliniensis</i>    | Fungaemia                                          | blood                                                                                                   | USA                                                                                                           | Brandt et al. 2000                                                                                                                                                                                                                                                                                                                                                                                                                                                                                                                                                                |



|                              |                              |                                                                |                                                          |                                                       |                                                                                                                                                                                                                       |
|------------------------------|------------------------------|----------------------------------------------------------------|----------------------------------------------------------|-------------------------------------------------------|-----------------------------------------------------------------------------------------------------------------------------------------------------------------------------------------------------------------------|
| <i>Candida metapsilosis</i>  | <i>Candida metapsilosis</i>  | Candidemia                                                     | blood                                                    | China, Spain, & USA                                   | Tavanti et al. 2005, <a href="#">Kosa et al. 2006</a> , Gacser et al. 2007, <a href="#">Cantón et al. 2011</a> , <a href="#">Guo et al. 2021</a>                                                                      |
|                              |                              | Vulvovaginal candidiasis                                       | vagina                                                   | China                                                 | <a href="#">Zhu et al. 2015</a>                                                                                                                                                                                       |
| <i>Candida orthopsilosis</i> | <i>Candida orthopsilosis</i> | Candidemia                                                     | blood                                                    | China, Jamaica, Spain, USA                            | Tavanti et al. 2005, <a href="#">Kosa et al. 2006</a> , Gacser et al. 2007, Trofa et al. 2008, <a href="#">Cantón et al. 2011</a> , <a href="#">Guo et al. 2021</a>                                                   |
|                              |                              | Septic arthritis                                               | joints                                                   | Jamaica                                               | <a href="#">Heslop et al. 2015</a>                                                                                                                                                                                    |
|                              |                              | Vulvovaginal candidiasis                                       | vagina                                                   | China                                                 | <a href="#">Zhu et al. 2015</a>                                                                                                                                                                                       |
| <i>Candida parapsilosis</i>  | <i>Candida parapsilosis</i>  | Candidemia & invasive candidiasis                              | blood                                                    | Brazil, China, Germany Hungary, India, Japan, & Spain | Brito et al. 2006, Medrano et al. 2006, Nakamura and Takahashi 2006, <a href="#">Kocsube et al. 2007</a> , Xess et al. 2007, Gacser et al. 2005, <a href="#">Cantón et al. 2011</a> , <a href="#">Guo et al. 2021</a> |
|                              |                              | Vaginitis & vulvovaginal candidiasis                           | vagina                                                   | Italy                                                 | De Bernardis et al. 1989                                                                                                                                                                                              |
|                              |                              | Superficial candidiasis (Cutaneous & Onychomycotic infections) | finger nail, toenail, groin, neck & folds of genitals    | China                                                 | <a href="#">Feng et al. 2012</a>                                                                                                                                                                                      |
| <i>Candida tropicalis</i>    | <i>Candida tropicalis</i>    | Osteomyelitis, Vertebral bone,                                 | vertebrae                                                | Australia                                             | Eisen et al. 2000                                                                                                                                                                                                     |
|                              |                              | Septic arthritis                                               | right knee                                               | China, & Netherlands                                  | Weers-Pothoff et al. 1997, Wang et al. 2007                                                                                                                                                                           |
| <i>Catunica adiposa</i>      | <i>Ceratocystis adiposa</i>  | Rhinosinusitis                                                 | paranasal sinuses                                        | India                                                 | <a href="#">Agarwal et al. 2014</a>                                                                                                                                                                                   |
| <i>Chaetomium globosum</i>   | <i>Chaetomium globosum</i>   | Pulmonary mycosis                                              | lung tissues and bronchoalveolar lavage fluid            | India                                                 | Capoor et al. 2016                                                                                                                                                                                                    |
|                              |                              | Subcutaneous phaeohyphomycosis                                 | face, Skin and nail samples                              | China                                                 | <a href="#">Yu et al. 2006</a> , Tullio et al. 2010                                                                                                                                                                   |
|                              |                              | Onychomycosis                                                  | finger nails & great toenail                             | India & Spain                                         | Aspiroz et al. 2007, <a href="#">Latha et al. 2010</a>                                                                                                                                                                |
|                              |                              | Invasive pulmonary mycosis                                     | lungs                                                    | India                                                 | <a href="#">Capoor et al. 2015</a>                                                                                                                                                                                    |
|                              |                              | Onychomycosis                                                  | right toenails and left toenails, right hand nail plates | India & Korea                                         | Latha et al. 2010, <a href="#">Kim et al. 2013</a>                                                                                                                                                                    |
|                              |                              | Pulmonary mycosis                                              | lung tissues and bronchoalveolar lavage fluid            | India                                                 | Capoor et al. 2016                                                                                                                                                                                                    |
|                              |                              | Subcutaneous phaeohyphomycosis                                 | face, Skin and nail samples                              | China                                                 | <a href="#">Yu et al. 2006</a> , Tullio et al. 2010                                                                                                                                                                   |

|                                     |                                  |                            |                                                                                     |                     |                                                                                                        |
|-------------------------------------|----------------------------------|----------------------------|-------------------------------------------------------------------------------------|---------------------|--------------------------------------------------------------------------------------------------------|
|                                     |                                  | Onychomycosis              | right toenails and left toenails, right hand nail plates                            | Korea, India        | Latha et al. 2010, <a href="#">Kim et al. 2013</a>                                                     |
|                                     |                                  | Cerebral phaeohyphomycosis | lung tissue                                                                         | USA                 | Barron et al. 2003                                                                                     |
|                                     |                                  | Cerebral Phaeohyphomycosis | lung tissue                                                                         | USA                 | Barron et al. 2003                                                                                     |
| <i>Chaetomium strumarium</i>        | <i>Chaetomium strumarium</i>     | Cerebral infection         | brain                                                                               | USA                 | Aribandi et al. 2005                                                                                   |
|                                     |                                  | Corneal ulcer              | right eye                                                                           | India               | Reddy et al. 2017                                                                                      |
|                                     |                                  | Subcutaneous mycosis       | left upper arm and shoulder and the adjoining left side of his chest and upper back | India               | Verma et al. 2015                                                                                      |
|                                     |                                  | cerebral infection         | brain                                                                               | USA                 | Aribandi et al. 2005                                                                                   |
|                                     |                                  | Corneal ulcer              | right eye                                                                           | India               | Reddy et al. 2017                                                                                      |
| <i>Chaetomium strumarium</i>        | <i>Chaetomium strumarium</i>     | subcutaneous mycosis       | left upper arm and shoulder and the adjoining left side of his chest and upper back | India               | Verma et al. 2015                                                                                      |
| <i>Chlamydociium curvulum</i>       | <i>Acremonium curvulum</i>       | Chronic osteomyelitis      | tibia                                                                               | India               | Khan et al. 2019                                                                                       |
| <i>Chrysosporium queenslandicum</i> | <i>Chrysosporium articulatum</i> | Pulmonary infection        | lungs                                                                               | Thailand            | Suankratay et al. 2015                                                                                 |
| <i>Chrysosporium zonatum</i>        | <i>Chrysosporium zonatum</i>     | Disseminated Infection     | lungs & bones                                                                       | Canada              | Roilides et al. 1999                                                                                   |
|                                     |                                  | Pulmonary infection        | lungs                                                                               | Japan & Mexico      | Siddiqui and Zimmerman 2016, Matsuzaki et al. 2021                                                     |
| <i>Cladophialophora arxii</i>       | <i>Cladophialophora arxii</i>    | Femoral Osteomyelitis      | left femur                                                                          | Japan               | <a href="#">Shigemura et al. 2009</a>                                                                  |
|                                     |                                  | Pulmonary infection        | right lung                                                                          | Australia           | <a href="#">Brischetto et al. 2015</a>                                                                 |
| <i>Cladophialophora bantiana</i>    | <i>Cladophialophora bantiana</i> | Brain abscess              | cerebellum, parietal lobe, & left frontal lobe                                      | China, India, & USA | Arunkumar et al. 2000, Levin et al. 2004, Borkar et al. 2008, Huang et al. 2011, Aljuboory et al. 2017 |
|                                     |                                  | Disseminated infection     | skin (left shoulder),                                                               | Germany & USA       | Keyser et al. 2002, Mansour et al. 2014                                                                |

|                                     |                                     |                                          |                                                    |                |                                                                 |
|-------------------------------------|-------------------------------------|------------------------------------------|----------------------------------------------------|----------------|-----------------------------------------------------------------|
|                                     |                                     |                                          | brain (right cerebellar hemisphere), lungs, & CNS  |                |                                                                 |
| <i>Cladophialophora bantiana</i>    | <i>Cladophialophora bantiana</i>    | Osteomyelitis                            | left lower limb                                    | Belgium        | <a href="#">Desmet et al. 2016</a>                              |
| <i>Cladophialophora boppii</i>      | <i>Cladophialophora boppii</i>      | Pulmonary infection                      | parenchymal & bronchial infection                  | Italy          | Lastoria et al. 2009                                            |
|                                     |                                     | Cerebral infection                       | brain (left hemisphere)                            | Turkey         | Kantarcioglu et al. 2016                                        |
|                                     |                                     | Toenail infection                        | left big toenail                                   | Germany        | <a href="#">Brasch et al. 2011</a>                              |
| <i>Cladophialophora carrionii</i>   | <i>Cladophialophora carrionii</i>   | Chromoblastomycosis                      | left arm, lower left limb, & lower back            | India & Mexico | Pradeepkumar and Joseph 2011, <a href="#">Rojas et al. 2015</a> |
|                                     |                                     | Subcutaneous infection                   | right foot                                         | Austria        | Parente et al. 2011                                             |
| <i>Cladophialophora devriesii</i>   | <i>Cladophialophora devriesii</i>   | Sub-cutaneous infection                  | right forearm                                      | UK             | <a href="#">Howard et al. 2006</a>                              |
| <i>Cladophialophora emmonsii</i>    | <i>Xylohypha emmonsii</i>           | Subcutaneous infection                   | left arm                                           | USA            | Padhye et al. 1988                                              |
| <i>Cladophialophora saturnica</i>   | <i>Cladophialophora saturnica</i>   | Cutaneous infection                      | Interdigital webs                                  | Brazil         | <a href="#">Badali et al. 2009</a>                              |
| <i>Cladosporium cladosporioides</i> | <i>Cladosporium cladosporioides</i> | Keratomycosis                            | left eye                                           | Malaysia       | <a href="#">Fiona et al. 2009</a>                               |
|                                     |                                     | Acne-like subcutaneous phaeohyphomycosis | face and neck                                      | China          | <a href="#">Zhou et al. 2016</a>                                |
|                                     |                                     | Hemorrhagic pneumonia                    | lung                                               | Brazil         | Grava et al. 2016                                               |
|                                     |                                     | Phaeohyphomycosis                        | subcutaneous asymptomatic nodule in the left thigh | Portugal       | Vieira et al. 2001                                              |
|                                     |                                     | keratomycosis                            | left eye                                           | Malaysia       | <a href="#">Fiona, et al. 2009</a>                              |
|                                     |                                     | Acne-Like Subcutaneous Phaeohyphomycosis | face and neck                                      | China          | <a href="#">Zhou et al. 2016</a>                                |
|                                     |                                     | hemorrhagic pneumonia                    | lung                                               | Brazil         | Grava et al. 2016                                               |
| <i>Cladosporium cladosporioides</i> | <i>Cladosporium cladosporioides</i> | Phaeohyphomycosis                        | subcutaneous asymptomatic nodule in the left thigh | Portugal       | Vieira et al. 2001                                              |

|                                    |                                    |                                                             |                             |                   |                                         |
|------------------------------------|------------------------------------|-------------------------------------------------------------|-----------------------------|-------------------|-----------------------------------------|
| <i>Cladosporium oxysporum</i>      | <i>Cladosporium oxysporum</i>      | Cutaneous phaeohyphomycosis                                 | right leg, left foot        | Italy, India      | Romano et al. 1999, Gugnani et al. 2006 |
|                                    |                                    | Unilateral Cervical Lymphadenopathy                         | neck                        | Sri Lanka         | Jayasinghe et al. 2017                  |
|                                    |                                    | Cutaneous phaeohyphomycosis                                 | right leg, left foot        | Italy, India      | Romano et al. 1999, Gugnani et al. 2006 |
|                                    |                                    | Unilateral Cervical Lymphadenopathy                         | neck                        | Sri Lanka         | Jayasinghe et al. 2017                  |
| <i>Cladosporium sphaerospermum</i> | <i>Cladosporium sphaerospermum</i> | Cerebral abscess                                            | brain                       | India             | Batra et al. 2019                       |
|                                    |                                    | Subcutaneous infection                                      | dorsum of right hand        | India             | Maduri et al. 2015                      |
|                                    |                                    | Invasive lung infection                                     | respiratory tract           | USA               | Villanueva et al. 2022                  |
|                                    |                                    | Acute Meningitis                                            | cerebral spinal fluid       | Taiwan            | Lai et al. 2013                         |
|                                    |                                    | Cerebral abscess                                            | brain                       | India             | Batra et al. 2019                       |
|                                    |                                    | Subcutaneous infection                                      | dorsum of right hand        | India             | Maduri et al. 2015                      |
|                                    |                                    | Cladosporium sphaerospermum-induced invasive lung infection | respiratory tract           | USA               | Villanueva et al. 2022                  |
|                                    |                                    | Acute Meningitis                                            | cerebral spinal fluid       | Taiwan            | Lai et al. 2013                         |
| <i>Coccidioides immitis</i>        | <i>Coccidioides immitis</i>        | Vasculitis, Coccidioidal Meningitis (CM)                    | CNS, blood vessels & brain  | Mexico            | Williams et al. 1992                    |
|                                    |                                    | Pneumonia                                                   | lungs                       | USA               | Swartz et al. 2009                      |
|                                    |                                    | Disseminated osteomyelitis                                  | bones or joints             | USA               | Holley et al. 2002                      |
|                                    |                                    | Coccidioidomycosis (disseminated infection)                 | lungs & skin                | USA               | Linsangan and Ross 1999                 |
|                                    |                                    | Coccidioidomycosis                                          | lungs                       | China & Lithuania | Kwok et al. 2009, Alčauskas 2022        |
|                                    |                                    | Coccidioidomycosis Osteomyelitis                            | right ischium and manubrium | USA               | Caraway et al. 2003                     |
| <i>Coccidioides posadasii</i>      | <i>Coccidioides posadasii</i>      | Meningoencephalitis                                         | brain                       | Canada            | Lang et al. 2019                        |
|                                    |                                    | Coccidioidal meningitis                                     | brain                       | China             | Mao et al. 2021                         |
|                                    |                                    | Pulmonary coccidioidomycosis                                | lower right lung            | China             | Liang et al. 2018                       |
| <i>Colletotrichum asianum</i>      | <i>Colletotrichum asianum</i>      | Keratitis                                                   | eye                         | India             | Ghorpade et al. 2022                    |

|                                       |                                       |                                           |                                |                                                          |                                                                                    |
|---------------------------------------|---------------------------------------|-------------------------------------------|--------------------------------|----------------------------------------------------------|------------------------------------------------------------------------------------|
| <i>Colletotrichum chlorophyti</i>     | <i>Colletotrichum chlorophyti</i>     | Keratomycosis                             | eye                            | USA                                                      | <a href="#">Paniz-Mondolfi et al. 2021</a>                                         |
| <i>Colletotrichum coccodes</i>        | <i>Colletotrichum coccodes</i>        | Phaeohyphomycosis                         | left arm                       | USA                                                      | O'Quinn et al. 2001                                                                |
| <i>Colletotrichum crassipes</i>       | <i>Colletotrichum crassipes</i>       | Phaeohyphomycotic Cyst                    | right leg                      | Brazil                                                   | Martins Castro et al. 2001                                                         |
| <i>Colletotrichum dematium</i>        | <i>Colletotrichum dematium</i>        | Keratitis and endophthalmitis             | eye                            | Czech Republic & India                                   | Chakrabarti et al. 2008, <a href="#">Buchta et al. 2019</a> , Wankhade et al. 2021 |
| <i>Colletotrichum gloeosporioides</i> | <i>Colletotrichum gloeosporioides</i> | Keratitis                                 | eye                            | India & Japan                                            | <a href="#">Shiraishi et al. 2011</a> , Pote et al. 2017                           |
|                                       |                                       | Subcutaneous Hyalohyphomycosis            | left forearm & elbow           | Spain                                                    | Guarro et al. 1998                                                                 |
| <i>Colletotrichum graminicola</i>     | <i>Colletotrichum graminicola</i>     | Keratitis                                 | eye                            | India & USA                                              | Ritterband et al. 1997, Yegneswaran et al. 2010                                    |
| <i>Colletotrichum siamense</i>        | <i>Colletotrichum siamense</i>        | Cutaneous infection                       | right fourth finger            | USA                                                      | <a href="#">Werbel et al. 2019</a>                                                 |
| <i>Colletotrichum truncatum</i>       | <i>Colletotrichum truncatum</i>       | Keratitis and Endophthalmitis             | eye                            | India                                                    | <a href="#">Shivaprakash et al. 2011</a>                                           |
| <i>Conidiobolus coronatus</i>         | <i>Conidiobolus coronatus</i>         | Rhinoentomophthoromycosis                 | nose                           | India, Brazil, Switzerland, & United Arab Emirates (UAE) | Valle et al. 2001, Fischer et al. 2008, <a href="#">Chowdhary et al. 2010</a>      |
|                                       |                                       | Disseminated infection                    | lungs & pulmonary vessel walls | USA                                                      | Walker et al. 1992, Deak et al. 2018                                               |
|                                       |                                       | Vaginal infection                         | cervix and vagina              | USA                                                      | Subramanian and Sobel 2011                                                         |
| <i>Conidiobolus incongruus</i>        | <i>Conidiobolus incongruus</i>        | rhino-orbitocerebral entomophthoromycosis | nose & Germany                 | midface                                                  | <a href="#">Wüppenhorst et al. 2010</a>                                            |
| <i>Conidiobolus lamprauges</i>        | <i>Conidiobolus lamprauges</i>        | Disseminated infectionlungs               | kidneys & spleen               | Japan                                                    | <a href="#">Kimura et al. 2011</a>                                                 |
| <i>Coniochaeta massiliensis</i>       | <i>Coniochaeta massiliensis</i>       | Skin infection                            | abscess of the hand            | France                                                   | <a href="#">Kabtani et al. 2022</a>                                                |
|                                       |                                       | Skin infection                            | abscess of the hand            | France                                                   | <a href="#">Kabtani et al. 2022</a>                                                |
| <i>Coniochaeta mutabilis</i>          | <i>Coniochaeta mutabilis</i>          | Keratitis                                 | left eye                       | USA                                                      | <a href="#">Oremosu et al. 2023</a> , Bellanda et al. 2023                         |
|                                       |                                       | Keratitis                                 | left eye                       | USA                                                      | Bellanda et al. 2023, Oremosu et al. 2023                                          |
| <i>Coprinosia cinerea</i>             | <i>Coprinosia cinerea</i>             | Skin and soft tissue infection            | head                           | Germany                                                  | <a href="#">Correa-Martinez et al. 2018</a>                                        |
|                                       |                                       | Pneumonia                                 | respiratory Tract Infection    | Korea                                                    | <a href="#">Lee et al. 2020</a>                                                    |
| <i>Cryptococcus decagattii</i>        | <i>Cryptococcus</i>                   | Cryptococcosis                            | CNS                            | Argentina                                                | <a href="#">Berejnoi et al. 2019</a>                                               |

|                                     |                                                   |                                             |                                                                       |                        |                                                              |
|-------------------------------------|---------------------------------------------------|---------------------------------------------|-----------------------------------------------------------------------|------------------------|--------------------------------------------------------------|
|                                     | <i>decagattii</i>                                 |                                             |                                                                       |                        |                                                              |
| <i>Cryptococcus gattii</i>          | <i>Cryptococcus gattii</i>                        | Cryptococcosis                              | lungs, central nervous system (CNS)                                   | China                  | Xue et al. 2020                                              |
|                                     |                                                   | Cutaneous cryptococcosis                    | right forearm                                                         | Brazil                 | Nascimento et al. 2014                                       |
| <i>Cryptococcus neoformans</i>      | <i>Cryptococcus neoformans</i>                    | Pulmonary infection                         | lungs                                                                 | USA                    | Young et al. 1980                                            |
|                                     |                                                   | acute and chronic inflammation, meningitis  | cerebrospinal fluid (CSF)                                             | USA                    | Williamson et al. 1996                                       |
|                                     |                                                   | Cryptococcosis (Disseminated infection)     | right thigh, mediastinum, skin, lungs, spine and iliac fossa          | China & India          | Suchitha et al. 2012, Ruan et al. 2017                       |
|                                     |                                                   | Disseminated infections                     | lungs                                                                 | Spain                  | Alegre-González et al. 2021                                  |
|                                     |                                                   | Osteomyelitis                               | right elbow                                                           | Taiwan                 | Liu et al. 1998                                              |
|                                     |                                                   | Prosthetic valve endocarditis               | brachial artery                                                       | India                  | Banerjee et al. 1997                                         |
|                                     | <i>Cryptococcus neoformans</i> var. <i>grubii</i> | Cellulitis                                  | legs                                                                  | China                  | Song et al. 2021                                             |
| <i>Cunninghamella arunalohei</i>    | <i>Cunninghamella arunalohei</i>                  | Chronic rhino-orbital-cerebral mucormycosis | nose and swelling in the left mid-half of the face                    | India                  | Hallur et al.2021                                            |
| <i>Cunninghamella bertholletiae</i> | <i>Cunninghamella bertholletiae</i>               | Cutaneous infection                         | right hip                                                             | France                 | Quinio et al. 2004                                           |
|                                     |                                                   | Paranasal sinusitis                         | maxillary antrum                                                      | UK                     | Ng et al. 1994                                               |
|                                     |                                                   | Disseminated infection                      | lungs, forehead, & right big toe                                      | Taiwan                 | Hsieh et al. 2013                                            |
|                                     |                                                   | Pneumonia/ Pulmonary infection              | lungs                                                                 | Germany, Greece, & USA | Rickerts et al. 2000, Garey et al. 2001, Bibashi et al. 2008 |
|                                     |                                                   | Endocarditis and Hemorrhagic Stroke         | left upper lobe of the lung, myocardium and endocardium, mitral valve | Georgia                | Zhang et al. 2002                                            |
|                                     |                                                   | Peritonitis                                 | abdomen                                                               | Australia              | Pimentel et al. 2006                                         |
|                                     |                                                   | Nosocomial Invasive Infection               | blood                                                                 | Brazil                 | Passos et al. 2006                                           |
| <i>Curvularia australiensis</i>     | <i>Curvularia</i>                                 | Keratomycoses                               | eye                                                                   | India                  | Krizsan et al. 2015                                          |

|                                 |                                 |                                   |                                                                         |                  |                                              |
|---------------------------------|---------------------------------|-----------------------------------|-------------------------------------------------------------------------|------------------|----------------------------------------------|
|                                 | <i>australiensis</i>            |                                   |                                                                         |                  |                                              |
| <i>Curvularia brachyspora</i>   | <i>Curvularia brachyspora</i>   | Keratitis                         | eye                                                                     | South Africa     | Marcuset al. 1992                            |
|                                 |                                 | Cutaneous infection               | thighs                                                                  | Australia        | Torda et al. 1997                            |
|                                 |                                 | Cutaneous infection               | thighs                                                                  | Australia        | Torda and Jones 1997                         |
| <i>Curvularia clavata</i>       | <i>Curvularia clavata</i>       | Cutaneous phaeohyphomycosis       | left foot, face and left upper arm                                      | China            | Wang et al. 2003, Fan et al. 2009            |
|                                 |                                 | Invasive sinusitis and cerebritis | sinuses and brain, maxillary, frontal, & left sphenoid sinuses          | USA              | Ebright et al. 1999                          |
| <i>Curvularia coimbatoensis</i> | <i>Curvularia coimbatoensis</i> | Keratitis                         | eye                                                                     | India            | Kiss et al. 1999                             |
| <i>Curvularia geniculata</i>    | <i>Curvularia geniculata</i>    | Peritonitis                       | abdomen                                                                 | USA              | Vachharajani et al. 2005                     |
| <i>Curvularia hawaiiensis</i>   | <i>Curvularia hawaiiensis</i>   | Keratomycoses                     | eye                                                                     | India            | Krizsan et al. 2015                          |
|                                 |                                 | Keratomycosis and Endophthalmitis | eye                                                                     | India            | Bashir et al. 2009                           |
|                                 |                                 | Allergic bronchopulmonary mycosis | left main bronchus and left upper & lower lobes                         | India & USA      | Saenz et al. 2001, Chowdhary et al. 2011     |
|                                 |                                 | Rhinosinusitis                    | Left & right nasoethmoidal polyp                                        | India & Qatar    | Taj-Aldeen et al. 2004                       |
| <i>Curvularia inaequalis</i>    | <i>Curvularia inaequalis</i>    | Peritonitis                       | abdomen                                                                 | Australia        | Pimentel et al. 2005                         |
|                                 |                                 | Rhinosinusitis                    | right maxillary and ethmoid sinuses, Right frontal and sphenoid sinuses | Italy            | Posteraro et al. 2010                        |
| <i>Curvularia lunata</i>        | <i>Curvularia lunata</i>        | Subcutaneous phaeohyphomycosis    | left leg                                                                | Mexico           | Vásquez-del-Mercado et al. 2013              |
|                                 |                                 | Cerebral Phaeohyphomycosis        | brain                                                                   | USA              | Carter and Boudreaux 2004                    |
|                                 |                                 | Endophthalmitis                   | left eye                                                                | India, USA       | Kaushik et al. 2001, Alex et al. 2013        |
|                                 |                                 | Endophthalmitis                   | left eye                                                                | Colombia, Brazil | Berbel et al. 2011, Jaramillo and Varon 2013 |
|                                 |                                 | Rhinosinusitis                    | paranasal sinus                                                         | India, Italy     | Cavanna et al. 2014, Gupta et al. 2017       |
|                                 |                                 | Peritonitis                       | abdomen                                                                 | Brazil           | Lopes et al. 1994                            |



|                                  |                                  |                                        |                                                    |                        |                                          |
|----------------------------------|----------------------------------|----------------------------------------|----------------------------------------------------|------------------------|------------------------------------------|
|                                  |                                  | Cutaneous infectious granuloma         | nose                                               | China                  | Wang et al. 2023                         |
|                                  |                                  | Rhinosinusitis with orbital cellulitis | eye                                                | India                  | Narula et al. 2020                       |
|                                  |                                  | Paronychia and black discoloration     | thumb nail                                         | India                  | Kamalam et al. 1992                      |
|                                  |                                  | Cutaneous phaeohyphomycosis            | foot web                                           | India                  | Rasheeduddin et al. 2017                 |
| <i>Curvularia pallescens</i>     | <i>Curvularia pallescens</i>     | Cutaneous infection                    | right leg, ankle region of both feet & right thigh | USA                    | Agrawal and Singh 1995, Berg et al. 1995 |
|                                  |                                  | Pulmonary and cerebral mycetoma        | Lungs & brain                                      | USA                    | Lampert et al. 1997                      |
|                                  |                                  | Keratitis                              | eye                                                | USA                    | Wilhelmus and Jones 2001                 |
| <i>Curvularia senegalensis</i>   | <i>Curvularia senegalensis</i>   | keratitis                              | eye                                                | Brazil                 | Guarro et al. 1999                       |
| <i>Curvularia spicifera</i>      | <i>Curvularia spicifera</i>      | Keratomycoses                          | eye                                                | India                  | Krizsan et al. 2015                      |
|                                  |                                  | Nasal phaeohyphomycosis                | nasal septum                                       | Chile                  | Bay et al. 2017                          |
|                                  |                                  | Disseminated infection                 | lungs, liver, brain, & neck to abdominal regions   | Japan                  | Kobayashi et al. 2008                    |
|                                  |                                  | Allergic fungal sinusitis              | paranasal sinuses                                  | Japan                  | Taguchi et al. 2007                      |
| <i>Curvularia tamilnaduensis</i> | <i>Curvularia tamilnaduensis</i> | Keratitis                              | eye                                                | India                  | Kiss et al. 1999                         |
| <i>Curvularia trifolii</i>       | <i>Curvularia trifolii</i>       | Cutaneous infection                    | right forearm                                      | Japan                  | Kiryu 1985                               |
| <i>Curvularia warraberensis</i>  | <i>Curvularia warraberensis</i>  | Invasive sinusitis                     | sphenoid and ethmoid sinuses                       | India                  | Samaddar et al. 2023                     |
| <i>Cyberlindnera fabianii</i>    | <i>Candida fabianii</i>          | Septicaemia                            | blood                                              | Germany                | Valenza et al. 2006                      |
|                                  | <i>Pichia fabianii</i>           | Endocarditis                           | aortic valve                                       | China & Czech Republic | Hamal et al. 2008, Wu et al. 2013        |
|                                  | <i>Lindnera fabianii</i>         | Fungemia                               | blood                                              | France                 | Gabriel et al. 2012                      |
|                                  | <i>Cyberlindnera fabianii</i>    | Fungemia                               | blood                                              | Kuwait & China         | Wu et al. 2013, Al-Sweih et al. 2019     |
|                                  |                                  | Vulvovaginitis                         | vulva                                              | Iraq                   | Zghair 2020                              |
|                                  |                                  | Ventriculoperitoneal Shunt Infection   | central nervous system (CNS)                       | USA                    | Baghdadi et al. 2015                     |
|                                  |                                  | Urinary tract & Fungemia               | urinary tract & blood infections                   | Croatia                | Mlinarić-Missoni et al. 2015             |

|                                |                               |                                              |                                         |                          |                                                                     |
|--------------------------------|-------------------------------|----------------------------------------------|-----------------------------------------|--------------------------|---------------------------------------------------------------------|
| <i>Cyberlindnera jadinii</i>   | <i>Candida utilis</i>         | Fungaemia                                    | blood                                   | Croatia, France, & India | Lukić-Grlić et al. 2011, Shivadasan et al. 2016, Gaisne et al. 2018 |
|                                |                               | Chronic urinary tract infection              | urinary tract                           | USA                      | Hazen et al. 1999                                                   |
|                                |                               | Keratitis                                    | eye                                     | China                    | Shih et al. 1999                                                    |
|                                | <i>Cyberlindnera jadinii</i>  | Candidaemia                                  | blood                                   | France                   | Treguier et al. 2018                                                |
| <i>Debaryomyces hansenii</i>   | <i>Debaryomyces hansenii</i>  | Bone infection                               | distal tibia                            | canada                   | Wong et al. 1982                                                    |
|                                |                               | Extrinsic allergic alveolitis                | extrinsic allergic alveolitis           | Japan                    | Yamamoto et al. 2002                                                |
|                                |                               | Bone infection                               | distal tibia                            | Canada                   | Wong et al. 1982                                                    |
|                                |                               | Extrinsic allergic alveolitis                | extrinsic allergic alveolitis           | Japan                    | Yamamoto et al. 2002                                                |
| <i>Dichotomopilus funicola</i> | <i>Chaetomium funicola</i>    | Chromoblastomycosis                          | skin on the dorsum of right hand        | Western Panama           | Piepenbring et al. 2007                                             |
|                                |                               | Chromoblastomycosis (skin lesions)           | dorsum of the right hand                | Panama                   | Piepenbring et al. 2007                                             |
|                                |                               | Keratitis                                    | eye                                     | India                    | Balne et al. 2012                                                   |
|                                |                               | Eumycetoma                                   | left foot                               | Sudan                    | Mhmoud et al. 2019                                                  |
|                                |                               | Chromoblastomycosis                          | skin on the dorsum of right hand        | Western Panama           | Piepenbring et al. 2007                                             |
| <i>Didymella glomerata</i>     | <i>Phoma glomerata</i>        | Onychomycosis                                | toenail                                 | Iran                     | Zarei et al. 2023                                                   |
|                                |                               | Keratitis                                    | left eye                                | Korea                    | Jun et al. 2014                                                     |
| <i>Didymella heteroderae</i>   | <i>Didymella heteroderae</i>  | Keratitis                                    | eye and contact lens                    | Japan                    | Todokoro et al. 2021                                                |
|                                |                               | Fungal keratitis                             | eye and contact lens                    | Japan                    | Todokoro et al. 2021                                                |
| <i>Diutina rugosa</i>          | <i>Candida rugosa</i>         | Candidaemia, blood,                          | blood                                   | India & USA              | Minces et al. 2009, Behera et al. 2010                              |
|                                |                               | Peritonitis                                  | abdomen                                 | Turkey                   | Kocyigit et al. 2010                                                |
| <i>Ectophoma insulana</i>      | <i>Phoma insulana</i>         | Chromoblastomycosis (subcutaneous infection) | foot                                    | Mexico                   | Hernández-Hernández et al. 2018                                     |
| <i>Emergomyces africanus</i>   | <i>Emergomyces africanus</i>  | Disseminated Emergomycosis                   | skin                                    | South Africa             | Govender and Grayson 2019                                           |
| <i>Emergomyces canadensis</i>  | <i>Emergomyces canadensis</i> | Disseminated infections                      | blood, skin, cervix, lung, & lymph node | USA                      | Schwartz et al. 2018                                                |
| <i>Emergomyces orientalis</i>  | <i>Emergomyces orientalis</i> | Disseminated infections                      | lungs, torso, & legs                    | China                    | Wang et al. 2017                                                    |
|                                |                               | Disseminated                                 | lungs                                   | Tibet                    | He et al. 2021                                                      |

|                                   |                                 |                                                      |                                                                                   |                |                                                     |
|-----------------------------------|---------------------------------|------------------------------------------------------|-----------------------------------------------------------------------------------|----------------|-----------------------------------------------------|
|                                   |                                 | Emergomycosis                                        |                                                                                   |                |                                                     |
| <i>Emergomycetes pasteurianus</i> | <i>Emmonsia pasteuriana</i>     | Disseminated infection                               | skin lesions (abdomen, head, nose and left thigh, neck, forehead, & arm), & lungs | China & India  | <a href="#">Feng et al. 2015, Malik et al. 2016</a> |
|                                   |                                 | Pneumonia                                            | lungs                                                                             | Hong Kong      | Chik and To 2020                                    |
|                                   |                                 | pulmonary and subcutaneous lesions                   | lungs & left leg                                                                  | Netherlands    | <a href="#">Gast et al. 2019</a>                    |
| <i>Emmonsia crescens</i>          | <i>Emmonsia crescens</i>        | Disseminated Adiaspiromycosis                        | lungs                                                                             | France         | <a href="#">Dot et al. 2009</a>                     |
| <i>Epicoccum tritici</i>          | <i>Epicoccum tritici</i>        | Cutaneous phaeohyphomycosis                          | skin                                                                              | India          | <a href="#">Sharma et al. 2021</a>                  |
|                                   |                                 | Cutaneous phaeohyphomycosis                          | skin                                                                              | India          | <a href="#">Sharma et al. 2021</a>                  |
| <i>Epidermophyton floccosum</i>   | <i>Epidermophyton floccosum</i> | Dermatophytosis (Tinea pedis)                        | toes                                                                              | Iran & Nigeria | Enweani et al. 1996, Pakshir and Hashemi 2006       |
|                                   |                                 | Disseminated tinea                                   | legs, groin, penis and lower abdomen                                              | China          | Qiangqiang et al. 2001                              |
|                                   |                                 | Nonepidermolytic hereditary palmoplantar keratoderma | palms & soles                                                                     | Japan          | Maruyama et al. 1999                                |
| <i>Exophiala asiatica</i>         | <i>Exophiala asiatica</i>       | infection                                            | pharynx                                                                           | China          | <a href="#">Li et al. 2009</a>                      |
| <i>Exophiala bergeri</i>          | <i>Exophiala bergeri</i>        | Onychomycosis                                        | toe nail                                                                          | Hong Kong      | <a href="#">Woo et al. 2013</a>                     |
| <i>Exophiala cancerae</i>         | <i>Exophiala cancerae</i>       | Gastrointestinal tract infection                     | gastrointestinal tract                                                            | Hong Kong      | <a href="#">Woo et al. 2013</a>                     |
| <i>Exophiala dermatitidis</i>     | <i>Exophiala dermatitidis</i>   | Endophthalmitis                                      | left eye                                                                          | India          | Homa et al. 2018                                    |
|                                   |                                 | Meningitis                                           | CSF (cerebral spinal fluid)                                                       | China          | Wang et al. 1991, <a href="#">Li et al. 2011</a>    |
|                                   |                                 | Pneumonia                                            | lungs                                                                             | Germany        | Kusenbach et al. 1992                               |
| <i>Exophiala hongkongensis</i>    | <i>Exophiala hongkongensis</i>  | Onychomycosis                                        | right big toe                                                                     | Hong Kong      | <a href="#">Woo et al. 2013</a>                     |
| <i>Exophiala jeanselmei</i>       | <i>Exophiala jeanselmei</i>     | Subcutaneous infection                               | right arm                                                                         | Austria        | Parente et al. 2011                                 |
|                                   |                                 | Fungemia                                             | blood                                                                             | Brazil         | <a href="#">Marcio et al. 2002</a>                  |
|                                   |                                 | Keratitis                                            | left eye                                                                          | USA            | Saeedi et al. 2013                                  |
|                                   |                                 | Finger nodule                                        | right middle finger                                                               | Hong Kong      | <a href="#">Woo et al. 2013</a>                     |

|                                   |                                   |                                          |                                                                 |                       |                                                                           |
|-----------------------------------|-----------------------------------|------------------------------------------|-----------------------------------------------------------------|-----------------------|---------------------------------------------------------------------------|
|                                   |                                   | Skin nodules                             | left arm & right third finger                                   | USA                   | Lief et al. 2011                                                          |
| <i>Exophiala lecanii-corni</i>    | <i>Exophiala lecanii-corni</i>    | Chronic skin infection                   | Skin                                                            | Hong Kong             | Woo et al. 2013                                                           |
| <i>Exophiala oligosperma</i>      | <i>Exophiala oligosperma</i>      | Fungemia                                 | blood                                                           | Kuwait                | Al-Obaid et al. 2006                                                      |
|                                   |                                   | Cutaneous lesions                        | legs                                                            | USA                   | Rimawi et al. 2013                                                        |
|                                   |                                   | Subcutaneous phaeohyphomycotic cyst      | right elbow                                                     | India                 | Venkateshwar et al. 2014                                                  |
|                                   |                                   | Onychomycosis                            | toe nail                                                        | Taiwan                | Wen et al. 2016                                                           |
| <i>Exophiala pisciphila</i>       | <i>Exophiala pisciphila</i>       | Satellite papules                        | above the left medial malleolus                                 | USA                   | Sughayer et al. 1991                                                      |
|                                   |                                   | Allergic bronchopulmonary mycosis (ABPM) | lungs                                                           | USA                   | Kebbe and Mador 2016                                                      |
| <i>Exophiala spinifera</i>        | <i>Exophiala spinifera</i>        | Phaeohyphomycosis                        | face, chest, arms, & thighs                                     | India                 | Rajendran et al. 2003                                                     |
|                                   |                                   | Phaeohyphomycosis                        | right shin                                                      | USA                   | Harris et al. 2009                                                        |
|                                   |                                   | Pheohyphomycosis                         | face, legs, arms, & upperback                                   | India                 | Singal et al. 2008                                                        |
|                                   |                                   | Disseminated Phaeohyphomycosis           | Skin                                                            | Argentina             | Negrone et al. 2004                                                       |
|                                   |                                   | Chromoblastomycosis                      | right elbow & forearm                                           | USA                   | Barba-Gómez et al. 1992                                                   |
| <i>Exophiala xenobiotica</i>      | <i>Exophiala xenobiotica</i>      | Peritonitis                              | abdomen                                                         | Hong Kong             | Woo et al. 2013                                                           |
| <i>Falciformispora lignatilis</i> | <i>Falciformispora lignatilis</i> | eumycetoma                               | elbow                                                           | Philippines           | Olenski et al. 2021                                                       |
| <i>Falciformispora tompkinsii</i> | <i>Leptosphaeria tompkinsii</i>   | Mycetoma, _                              | _                                                               | Mauritania            | El-Ani et al. 1966                                                        |
| <i>Filobasidium magnum</i>        | <i>Filobasidium magnum</i>        | Otomycosis                               | ear canal                                                       | Iran                  | Aboutalebian et al. 2020                                                  |
| <i>Filobasidium uniguttulatum</i> | <i>Filobasidium uniguttulatum</i> | Meningitis                               | CNS                                                             | China                 | Pan et al. 2012                                                           |
|                                   |                                   | Corneal abscess                          | eye                                                             | Spain                 | Vecilla et al. 2023                                                       |
| <i>Fonsecaea monophora</i>        | <i>Fonsecaea monophora</i>        | Cerebral phaeohyphomycosis               | brain (left frontal lobe)                                       | Turkey, UK, & USA     | Surash et al. 2005, Koo et al. 2010, Doymaz et al. 2015                   |
|                                   |                                   | Chromoblastomycosis                      | left leg, right lower leg, face, right hand, & left side of the | Brazil, China, & Cuba | Xi et al. 2009, Zhang et al. 2009, Badali et al. 2013, Daboit et al. 2013 |

|                            |                            |                                               |                                                                                                                 |                            |                                                                                   |
|----------------------------|----------------------------|-----------------------------------------------|-----------------------------------------------------------------------------------------------------------------|----------------------------|-----------------------------------------------------------------------------------|
|                            |                            |                                               | abdomen                                                                                                         |                            |                                                                                   |
| <i>Fonsecaea nubica</i>    | <i>Fonsecaea nubica</i>    | Chromoblastomycosis (subcutaneous lesions)    | right back, hands and legs                                                                                      | Madagascar                 | Najafzadeh et al. 2010, You et al. 2019, Rasamoelina et al. 2020                  |
| <i>Fonsecaea pedrosoi</i>  | <i>Fonsecaea pedrosoi</i>  | Chromomycosis                                 | left buttock                                                                                                    | Japan                      | Kondo et al. 2005                                                                 |
|                            |                            | Chromoblastomycosis                           | right arm & left side of the abdomen                                                                            | Cuba                       | Badali et al. 2013                                                                |
|                            |                            | Corneal infection                             | eye                                                                                                             | Brazil                     | Höfling-Lima et al. 2005                                                          |
| <i>Fonsecaea pugnacius</i> | <i>Fonsecaea pugnacius</i> | Disseminated Chromoblastomycosis              | right arm, he left hemifacial area, & the nose, brain                                                           | Brazil                     | de Azevedo et al. 2015                                                            |
| <i>Fusarium acutatum</i>   | <i>Fusarium acutatum</i>   | Gangrenous necrosis                           | foot                                                                                                            | Qatar                      | Taj-Aldeen et al. 2006                                                            |
| <i>Fusarium dimerum</i>    | <i>Fusarium dimerum</i>    | Eye infection                                 | Eye                                                                                                             | South Africa               | Vismer et al. 2002                                                                |
|                            |                            | Soft-tissue infection and pulmonary infection | foot & lungs                                                                                                    | UK                         | Bigley et al. 2004                                                                |
|                            |                            | Fungaemia                                     | blood                                                                                                           | Slovakia                   | Krcmery et al. 1997                                                               |
|                            |                            | Onychomycosis                                 | nails (hand and toes)                                                                                           | Sri Lanka                  | Ranawaka et al. 2015                                                              |
|                            |                            | Disseminated Infection                        | blood & skin (legs)                                                                                             | France, & UK               | Austen et al. 2001, Letscher-Bru et al. 2002                                      |
|                            |                            | Bloodstream Infection                         | blood                                                                                                           | Saudi Arabia               | Alshaya et al. 2021                                                               |
|                            |                            | Burn wound infection                          | head, neck, hands, bilateral forearms, anterior chest, part of lower limbs, trunk, thighs and perineum and legs | Pakistan                   | Khalid et al. 2021                                                                |
|                            |                            | Onychomycosis                                 | fingers and toe nails                                                                                           | India                      | Ray et al. 2016                                                                   |
|                            |                            | Endophthalmitis                               | eye                                                                                                             | France & India             | Khan et al. 2012, Simon et al. 2018                                               |
|                            |                            | Cutaneous infection                           | legs feet, face and knee                                                                                        | Morocco & Spain            | Collado et al. 2013, Sebbane et al. 2022                                          |
| <i>Fusarium napiforme</i>  | <i>Fusarium napiforme</i>  | Disseminated infections                       | blood & skin                                                                                                    | Brazil                     | de Souza et al. 2014                                                              |
| <i>Fusarium oxysporum</i>  | <i>Fusarium oxysporum</i>  | Fungaemia                                     | blood                                                                                                           | Slovakia & USA             | Raad and Hachem 1995,Krcmery et al. 1997                                          |
|                            |                            | Onychomycosis                                 | nails (hand and toes)                                                                                           | Brazil, Italy, & Sri Lanka | Romano et al. 1998, Godoy et al. 2004, Carvalho et al. 2014, Ranawaka et al. 2015 |
|                            |                            | Localized Cutaneous Infection                 | finger of the left hand                                                                                         | Italy                      | Romano et al. 2010                                                                |
|                            |                            | Pneumonia                                     | lungs                                                                                                           | USA                        | Gorman et al. 2006                                                                |

|                                                      |                                                      |                                          |                                                                                 |                                       |                                                                                 |
|------------------------------------------------------|------------------------------------------------------|------------------------------------------|---------------------------------------------------------------------------------|---------------------------------------|---------------------------------------------------------------------------------|
|                                                      |                                                      | Chronic infection                        | right ear and preauricular area                                                 | Spain                                 | Pereiro et al. 2001                                                             |
|                                                      |                                                      | Endophthalmitis                          | eye                                                                             | Czech Republic                        | Buchta et al. 2014                                                              |
|                                                      |                                                      | Keratitis                                | eye                                                                             | India & Israel                        | Hemo et al. 1989, Vijaya 2001                                                   |
|                                                      |                                                      | Disseminated cutaneous infections        | skin (right upper leg & right elbow)                                            | USA                                   | Rippon et al. 1988, Albisetti et al. 2004                                       |
|                                                      |                                                      | Disseminated infections                  | pharynx, epiglottis, trachea, and oesophagus and spleen, lungs and both kidneys | Germany                               | Peltroche-Llacsahuanga et al. 2000                                              |
|                                                      |                                                      | Disseminated infections                  | skin, lung, blood, brain, & sinuses                                             | Canada                                | Schwartz et al. 2015                                                            |
| <i>Fusarium penzigii</i>                             | <i>Fusarium penzigii</i>                             | Keratitis                                | right eye                                                                       | Portugal                              | Do Carmo et al. 2016                                                            |
| <i>Fusarium sacchari</i>                             | <i>Fusarium sacchari</i>                             | Fungemia                                 | blood                                                                           | Spain                                 | Guarro et al. 2000                                                              |
| <i>Fusarium subglutinans</i>                         | <i>Fusarium subglutinans</i>                         | Eumycetoma                               | left leg and in the ankle                                                       | México                                | Campos-Macías et al. 2013                                                       |
| <i>Fusarium temperatum</i>                           | <i>Fusarium temperatum</i>                           | Keratitis                                | eye                                                                             | Netherlands                           | Al-Hatmi et al. 2014                                                            |
| <i>Fusarium verticillioides</i>                      | <i>Fusarium verticillioides</i>                      | Disseminated infections (fusariosis)     | blood                                                                           | Italy                                 | Fanci et al. 2013                                                               |
|                                                      |                                                      | Pneumonia                                | lungs                                                                           | France                                | Herbrecht et al. 2004                                                           |
|                                                      |                                                      | Erythema and swelling                    | fingers                                                                         | USA                                   | Palmore et al. 2010                                                             |
|                                                      |                                                      | Mycetoma                                 | right foot and ankle                                                            | Italy                                 | Ajello et al. 1985                                                              |
|                                                      |                                                      | Disseminated cutaneous infections        | face and lower extremities                                                      | Taiwan                                | Chi and Wang 2007                                                               |
|                                                      |                                                      | Superficial Suppurative Thrombophlebitis | veins                                                                           | USA                                   | Murray et al. 2003                                                              |
| <i>Histoplasma capsulatum</i>                        | <i>Histoplasma capsulatum</i>                        | Disseminated Histoplasmosis              | blood, lungs, metatarsal bones & skin                                           | Paraguay & Philippines                | Brilhante et al. 2012, Benítez et al. 2019                                      |
|                                                      |                                                      | Histoplasmosis                           | lungs                                                                           | South Africa                          | Pillay et al. 1997                                                              |
| <i>Histoplasma capsulatum</i> var. <i>capsulatum</i> | <i>Histoplasma capsulatum</i> var. <i>capsulatum</i> | Histoplasmosis                           | brain, lungs, & skin                                                            | Argentina, & USA                      | Wheat et al. 1992, Bracca et al. 2003                                           |
| <i>Histoplasma capsulatum</i> var. <i>duboisii</i>   | <i>Histoplasma capsulatum</i> var. <i>duboisii</i>   | Histoplasmosis                           | brain, lungs, skin, & spine                                                     | Japan, Mali, & The Republic of Congo, | Sharmin et al. 2003, Minta et al. 2005, Boukassa et al. 2019, Amona et al. 2021 |

|                                     |                                     |                                             |                                             |                                |                                                                                                                                  |
|-------------------------------------|-------------------------------------|---------------------------------------------|---------------------------------------------|--------------------------------|----------------------------------------------------------------------------------------------------------------------------------|
| <i>Hormographiella aspergillata</i> | <i>Hormographiella aspergillata</i> | Pulmonary Infection                         | lungs                                       | Belgium, France, & Switzerland | Lagrou et al. 2005, <a href="#">Godet et al. 2017</a> , <a href="#">Moniot et al. 2020</a> , <a href="#">Tschopp et al. 2021</a> |
|                                     |                                     | Cerebral infection                          | Brain (cerebral hemispheres and cerebellum) | Germany & USA                  | <a href="#">Abuali et al. 2009</a> , <a href="#">Hounchonou et al. 2022</a>                                                      |
|                                     |                                     | Corneal ulcer with endophthalmitis          | left eye                                    | India                          | <a href="#">Jain et al. 2019</a>                                                                                                 |
|                                     |                                     | Pulmonary infection                         | right upper lobe                            | Colombia                       | <a href="#">Isabel Cristina et al. 2020</a>                                                                                      |
|                                     |                                     | Sino-orbito-cerebral infection              | brain & sinuses                             | France                         | <a href="#">Heiblig et al. 2015</a>                                                                                              |
|                                     |                                     | Necrotizing scleritis                       | sclera                                      | Spain                          | <a href="#">Lamas-Francis et al. 2022</a>                                                                                        |
|                                     |                                     | Skin and pulmonary infection                | right forearm & lungs                       | Austria                        | <a href="#">Bojic et al. 2013</a>                                                                                                |
|                                     |                                     | Disseminated infection                      | blood, lungs, & brain                       | USA                            | <a href="#">Chauhan et al. 2019</a>                                                                                              |
| <i>Hortaea werneckii</i>            | <i>Hortaea werneckii</i>            | Tinea nigra                                 | palms & left wrist                          | China & Mexico                 | <a href="#">Bonifaz et al. 2008</a> , <a href="#">Mei et al. 2020</a>                                                            |
| <i>Irpex laceratus</i>              | <i>Emmia lacerata</i>               | Pneumonia                                   | respiratory Tract Infection                 | Korea                          | <a href="#">Lee et al. 2020</a>                                                                                                  |
| <i>Irpex lacteus</i>                | <i>Irpex lacteus</i>                | Pneumonia                                   | respiratory Tract Infection                 | Korea                          | <a href="#">Lee et al. 2020</a>                                                                                                  |
| <i>Kazachstania bovina</i>          | <i>Kazachstania bovina</i>          | Bloodstream infection                       | blood                                       | France                         | <a href="#">Deroche et al. 2022</a>                                                                                              |
| <i>Kazachstania slooffiae</i>       | <i>Kazachstania slooffiae</i>       | Pleural infection                           | lungs                                       | France                         | <a href="#">Mercier et al. 2021</a>                                                                                              |
|                                     |                                     | Esophagus infection                         | esophagus                                   | Spain                          | <a href="#">Gallotti et al. 2023</a>                                                                                             |
| <i>Knufia epidermidis</i>           | <i>Coniosporium epidermidis</i>     | Superficial and cutaneous infection         | axilla, toes, & toe webs                    | China & Denmark                | <a href="#">Li et al. 2008</a>                                                                                                   |
| <i>Lasionectriopsis pteridii</i>    | <i>Acremonium pteridii</i>          | Dermatitis                                  | nails                                       | USA                            | <a href="#">Perdomo et al. 2011</a>                                                                                              |
| <i>Lichtheimia corymbifera</i>      | <i>Lichtheimia corymbifera</i>      | Subcutaneous infection                      | right leg                                   | Spain                          | <a href="#">Blazquez et al. 2010</a>                                                                                             |
|                                     |                                     | Pulmonary infection (pulmonary zygomycosis) | lungs                                       | Lithuania                      | <a href="#">Kleinotiene et al. 2013</a>                                                                                          |
|                                     |                                     | Pulmonary infection                         | lungs                                       | Mexico                         | <a href="#">Fernández-García et al. 2021</a>                                                                                     |
|                                     |                                     | Otomycosis                                  | ear                                         | India                          | <a href="#">Vyas and Shah 2011</a>                                                                                               |
|                                     |                                     | Disseminated mucormycosis                   | liver, lungs, & spleen                      | France                         | <a href="#">Grossi et al. 2019</a>                                                                                               |
|                                     |                                     | Subcutaneous mucormycosis                   | right foot                                  | Morocco                        | <a href="#">Razouk et al. 2012</a>                                                                                               |
| <i>Lichtheimia ornata</i>           | <i>Lichtheimia ornata</i>           | Rhinocerebral mucormycosis                  | brain                                       | China                          | <a href="#">Pan et al. 2020</a>                                                                                                  |
| <i>Lichtheimia ramosa</i>           | <i>Lichtheimia ramosa</i>           | Intestinal mycosis                          | colon                                       | Japan                          | <a href="#">Kaneko et al. 2018</a>                                                                                               |
|                                     |                                     | Mucormycosis (mycotic                       | lungs                                       | Spain                          | <a href="#">Mouronte-Roibás et al. 2016</a>                                                                                      |



|                                  |                                  |                                           |                                                   |                                  |                                                                                                     |
|----------------------------------|----------------------------------|-------------------------------------------|---------------------------------------------------|----------------------------------|-----------------------------------------------------------------------------------------------------|
|                                  |                                  | thromboses)                               |                                                   |                                  |                                                                                                     |
|                                  |                                  | Cutaneous mucormycosis                    | burn wounds                                       | India                            | Kaur et al. 2014                                                                                    |
|                                  |                                  | Wound infection                           | left lumbar region & left foot,                   | Greece & India                   | Bibashi et al. 2013, <a href="#">Neelaveni et al. 2017</a>                                          |
|                                  |                                  | Pulmonary mucormycosis                    | lungs                                             | Turkey                           | Kutlu et al. 2014                                                                                   |
|                                  |                                  | Mucormycosis                              | nasal cavity                                      | Tunisia                          | <a href="#">Houaida et al. 2022</a>                                                                 |
| <i>Lomentospora prolificans</i>  | <i>Scedosporium prolificans</i>  | Disseminated infections                   | blood, lungs, skin, Kidney, & CNS                 | Spain                            | Alvarez et al. 1995, Husain et al. 2005                                                             |
|                                  |                                  | Endophthalmitis                           | eye                                               | USA                              | Vagefi et al. 2005                                                                                  |
|                                  |                                  | Fungemia                                  | blood                                             | Spain                            | Simarro et al. 2001                                                                                 |
|                                  |                                  | CNS infection                             | right sylvian fissure                             | USA                              | Bhat et al. 2007                                                                                    |
| <i>Madurella mycetomatis</i>     | <i>Madurella mycetomatis</i>     | Mycetoma                                  | left ankle, hand, gluteal region, foot & knee     | Saudi Arabia, Sri Lanka, & Sudan | Fahal et al. 2011, <a href="#">Mufti and Aljhdali 2015</a> , Sigera et al. 2020                     |
| <i>Madurella mycetomatis</i>     | <i>Madurella mycetomatis</i>     | Eumycetoma                                | axilla                                            | India                            | Subhashini et al. 2019                                                                              |
| <i>Malassezia furfur</i>         | <i>Malassezia furfur</i>         | Fungaemia                                 | blood                                             | Hong Kong & USA                  | Barber et al. 1993, Schleman et al. 2000, Chu and Lai 2002                                          |
|                                  |                                  | Proximal onychomycosis                    | proximal regions of right hand nails, & toe nails | Iran & Turkey                    | Kessler et al. 2002, Ertam et al. 2007, Zareei et al. 2013                                          |
|                                  |                                  | Pustulosis                                | face, neck, & scalp                               | France                           | Rapelanoro et al. 1996                                                                              |
| <i>Malassezia pachydermatis</i>  | <i>Malassezia pachydermatis</i>  | Fungemia                                  | blood                                             | Korea, Kuwait, Singapore, Taiwan | <a href="#">Al-Sweih et al. 2014</a> , Choudhury and Marte 2014, Lee et al. 2019, Huang et al. 2020 |
| <i>Malassezia sp.</i>            | <i>Malassezia sp.</i>            | Folliculitis                              | skin (face, neck and upper trunk)                 | Denmark & Tunisia                | Anane et al. 2013, Andersen et al. 2018, Li et al. 2022                                             |
| <i>Malassezia sympodialis</i>    | <i>Malassezia sympodialis</i>    | Malignant otitis externa                  | ear (external auditory canal)                     | Australia                        | Chai et al. 2000                                                                                    |
|                                  |                                  | Cutaneous infection                       | back, chest, & neck                               | USA                              | <a href="#">Desai et al. 2011</a>                                                                   |
|                                  |                                  | Pityriasis versicolor circinata           | trunk & upper extremities                         | Brazil                           | <a href="#">Framil et al. 2010</a>                                                                  |
|                                  |                                  | Fungemia and interstitial lung compromise | lungs & Blood                                     | Argentina                        | <a href="#">Aguirre et al. 2015</a>                                                                 |
| <i>Megasporoporia setulosa</i>   | <i>Megasporoporia setulosa</i>   | Subcutaneous mycosis                      | left foot                                         | India                            | <a href="#">Samaddar et al. 2023b</a>                                                               |
| <i>Meyerozyma guilliermondii</i> | <i>Meyerozyma guilliermondii</i> | Bloodstream infections                    | bood                                              | Brazil & Turkey                  | <a href="#">Gřler et al. 2017</a> , <a href="#">Chaves et al 2021</a>                               |

|                                   |                                   |                                               |                               |                 |                                                                     |
|-----------------------------------|-----------------------------------|-----------------------------------------------|-------------------------------|-----------------|---------------------------------------------------------------------|
| <i>Microascus cinereus</i>        | <i>Microascus cinereus</i>        | Brain abscess                                 | brain                         | India & USA     | Baddley et al. 2000, <a href="#">Malik et al. 2020</a>              |
|                                   |                                   | Suppurative Cutaneous Granulomata             | chest, back, & arm            | USA             | Marques et al. 1995                                                 |
|                                   |                                   | Onychomycosis                                 | big toe of the left foot      | Italy           | Tullio et al. 2010                                                  |
| <i>Microascus cirrosus</i>        | <i>Microascus cirrosus</i>        | Disseminated fungal infection & with Fungemia | pleura, lungs & blood         | France          | Krisher et al. 1995, <a href="#">Miossec et al. 2011</a>            |
|                                   |                                   | Cutaneous infection                           | left ankle                    | China           | <a href="#">Gao et al. 2018</a>                                     |
|                                   |                                   | Pulmonary infection                           | lungs                         | China           | <a href="#">Liu et al. 2021</a> , <a href="#">Cheng et al. 2023</a> |
| <i>Microascus ennothomasi</i>     | <i>Microascus ennothomasi</i>     | Subcutaneous infectio                         | right thumb                   | Germany         | <a href="#">Brasch et al. 2018</a>                                  |
| <i>Microascus gracilis</i>        | <i>Microascus gracilis</i>        | Scopulariopsis                                | lungs                         | China           | Huang et al. 2019                                                   |
|                                   |                                   | Disseminated infection                        | pleura, brain, heart, & lungs | USA             | <a href="#">Ding et al. 2020</a>                                    |
| <i>Microascus paisii</i>          | <i>Scopulariopsis brumptii</i>    | Onychomycosis                                 | nails (left hand)             | India           | Naidu et al. 1991                                                   |
| <i>Microascus trigonosporus</i>   | <i>Microascus trigonosporus</i>   | Pulmonary Infection                           | lungs                         | USA             | <a href="#">Schoeppler et al. 2015</a>                              |
| <i>Microdochium nivale</i>        | <i>Fusarium nivale</i>            | Corneal mycosis                               | eye                           | Poland          | Perz 1966                                                           |
| <i>Microsphaeropsis arundinis</i> | <i>Microsphaeropsis arundinis</i> | Skin and soft tissue infection                | skin and soft tissues         | Australia       | <a href="#">Crawford et al. 2015</a>                                |
|                                   |                                   | Skin and soft tissue infection                | skin and soft tissues         | Australia       | <a href="#">Crawford et al. 2015</a>                                |
| <i>Microsphaeropsis olivacea</i>  | <i>Microsphaeropsis olivacea</i>  | Skin infection                                | skin                          | Espanya         | Guarro et al. 1999                                                  |
|                                   |                                   | Keratitis and consecutive endophthalmitis     | aqueous humor of eye          | USA             | Shah et al. 2001                                                    |
|                                   |                                   | Skin infection                                | skin                          | Espanya         | Guarro et al. 1999                                                  |
|                                   |                                   | Keratitis and consecutive endophthalmitis     | aqueous humor of eye          | USA             | Shah et al. 2001                                                    |
| <i>Microsporium audouinii</i>     | <i>Microsporium audouinii</i>     | Tinea capitis                                 | scalp                         | Nigeria & Spain | Enweani et al. 1996, Rezusta et al. 2011                            |
| <i>Microsporium canis</i>         | <i>Microsporium canis</i>         | Tinea corporis                                | skin (leg)                    | Italy           | Pasquetti et al. 2017                                               |
|                                   |                                   | Pseudomycetoma,                               | left knee, scalp,             | Brazil & USA    | Berg et al. 2007, Ruiz et al. 2020                                  |
|                                   |                                   | Kerion Cels                                   | occipital region of the scalp | Croatia         | <a href="#">Gorgievska-Sukarovska et al. 2017</a>                   |
| <i>Microsporium</i>               | <i>Microsporium</i>               | skin lesions circinate herpes                 | hand                          | Tunisia         | <a href="#">Neji et al. 2009</a>                                    |

|                               |                                 |                                                    |                                               |                    |                                                                                                                                 |
|-------------------------------|---------------------------------|----------------------------------------------------|-----------------------------------------------|--------------------|---------------------------------------------------------------------------------------------------------------------------------|
| <i>ferrugineum</i>            | <i>ferrugineum</i>              |                                                    |                                               |                    |                                                                                                                                 |
|                               |                                 | Tinea capitis                                      | scalp                                         | Thailand           | Wisuthsarewong et al. 1996                                                                                                      |
|                               |                                 | Deep dermatophytosis                               | head                                          | China              | Zhang et al. 2019                                                                                                               |
| <i>Mucor circinelloides</i>   | <i>Mucor circinelloides</i>     | Fungemia and cutaneous infection                   | blood & right hand                            | Turkey             | Dizbay et al. 2009                                                                                                              |
|                               |                                 | Fungemia                                           | blood                                         | USA                | Arroyo et al. 2016                                                                                                              |
|                               |                                 | Cutaneous infection                                | right leg & forearm                           | Australia & Canada | Chandra and Woodgyer 2002, <a href="#">Iwen et al. 2007</a>                                                                     |
|                               |                                 | Invasive Maxillofacial Zygomycosis                 | right maxilla                                 | Kuwait             | <a href="#">Khan et al. 2009</a>                                                                                                |
|                               |                                 | Rhinocerebral mucormycosis                         | sinuses, nasal passages, oral cavity, & brain | Australia          | Lazar et al. 2014                                                                                                               |
| <i>Mucor irregularis</i>      | <i>Mucor irregularis</i>        | Disseminated infection                             | nose, lips, eyelids, & the central face       | China              | <a href="#">Li et al. 2012</a>                                                                                                  |
|                               |                                 | Cutaneous Mucormycosis                             | inner canthus, right lower leg & right hand   | China, & Japan     | <a href="#">Kang et al. 2014</a> , Yamaguchi et al. 2015, Xia et al. 2015, <a href="#">Liang et al. 2018</a> , Tang et al. 2021 |
|                               |                                 | Cutaneous, Rhinofacial, and Pulmonary Mucormycosis | nasal septum, paranasal sinuslungs, & lungs   | China              | Xia et al. 2013                                                                                                                 |
|                               |                                 | Chronic Rhinofacial Mucormycosis                   | nasal septum                                  | India              | <a href="#">Hemashettar et al. 2011</a>                                                                                         |
| <i>Myrothecium gramineum</i>  | <i>Myrothecium gramineum</i>    | Keratitis                                          | eye                                           | India              | Rameshkumar et al. 2019                                                                                                         |
| <i>Naganishia albida</i>      | <i>Cryptococcus albidus</i>     | Cryptococcaemia                                    | CNS                                           | Greece             | Kordossis et al. 1998                                                                                                           |
|                               |                                 | Fungemia                                           | blood                                         | USA                | Choe et al. 2020                                                                                                                |
|                               |                                 | Pneumonia                                          | lungs                                         | Turkey             | <a href="#">Burnik et al. 2007</a>                                                                                              |
|                               | <i>Naganishia albida</i>        | Superficial cutaneous infection                    | axilla                                        | Iran               | <a href="#">Gharehbolagh et al. 2017</a>                                                                                        |
| <i>Naganishia diffluens</i>   | <i>Naganishia diffluens</i>     | Tinea cruris                                       | genital, pubic, perineal, and perianal skin   | China              | Yang et al.2023                                                                                                                 |
|                               |                                 | Tinea Cruris                                       | genital, pubic, perineal, and perianal skin   | China              | Yang et al.2023                                                                                                                 |
| <i>Naganishia friedmannii</i> | <i>Cryptococcus friedmannii</i> | Onychomycosis                                      | Toe nail                                      | Iran               | Ekhtiari et al. 2017                                                                                                            |

|                               |                                 |                                  |                                               |                    |                                               |
|-------------------------------|---------------------------------|----------------------------------|-----------------------------------------------|--------------------|-----------------------------------------------|
| <i>Nakaseomyces glabratus</i> | <i>Candida glabrata</i>         | Vulvovaginal candidiasis         | vagina                                        | USA                | Geiger et al. 1995                            |
|                               |                                 | Fungemia                         | blood                                         | USA                | Bodey et al. 2002, Lin et al. 2005            |
|                               |                                 | Endocarditis                     | ventricular endocardium                       | France             | Roger et al. 2000                             |
| <i>Nannizzia aenigmatica</i>  | <i>Microsporum aenigmaticum</i> | Tinea corporis                   | right dorsal wrist                            | Czech Republic     | Hubka et al. 2014                             |
| <i>Nannizzia fulva</i>        | <i>Nannizzia fulva</i>          | Tinea Capiti                     | scalp                                         | Iraq               | Gharib et al. 2022                            |
| <i>Nannizzia gypsea</i>       | <i>Microsporum gypseum</i>      | Dermatophytosis                  | popliteal fossa, knee, gluteus, & face        | Brazil             | Souza et al. 2016                             |
|                               |                                 | Onychomycosis and Tinea Corporis | finger nail                                   | USA                | Fike et al. 2018                              |
|                               |                                 | Tinea incognito                  | face & neck                                   | Italy              | Polilli et al. 2011                           |
|                               |                                 | Kerion Celsi                     | scalp                                         | Mexico             | Torres-Guerrero et al. 2015                   |
|                               | <i>Nannizzia gypsea</i>         | Tinea corporis                   | right upper quadrant & right forearm          | Japan & Madagascar | Kobayashi et al. 2018, Soankasina et al. 2018 |
|                               |                                 | Kerion Celsi                     | occipital region and neck                     | Japan              | Toyosawa et al. 2022                          |
|                               | <i>Arthroderma gypseum</i>      | Kerion Celsi                     | scalp                                         | Japan              | Iwasawa et al. 2009, 2012                     |
| <i>Nannizzia incurvata</i>    | <i>Nannizzia incurvata</i>      | Favus & tinea corporis           | right hip, scalp, & face                      | Cambodia & Vietnam | Uhrlaß et al. 2021                            |
|                               |                                 | Scrotal tinea                    | scrotum                                       | China              | Qiu et al. 2022                               |
| <i>Nannizzia nana</i>         | <i>Nannizzia nana</i>           | dermatomycoses (skin infections) | neck, feet, scalp, face, trunk, arms, & nails | Mexico & Poland    | Bonifaz et al. 2019, Gnat et al. 2020         |
|                               |                                 | Ringworm                         | right arm                                     | Spain              | Pendones-Ulerio et al. 2023                   |
| <i>Nannizzia perplicata</i>   | <i>Nannizzia perplicata</i>     | Tinea corporis                   | wrist and arm                                 | UK                 | Borman et al. 2019                            |
|                               | <i>Microsporum persicolor</i>   | Tinea corporis                   | left region of the abdomen                    | Iran               | Naseri et al. 2012                            |
|                               |                                 | Cutaneous infections             | fingers and left elbow                        | Germany            | Chen et al. 2012                              |
| <i>Nannizzia polymorpha</i>   | <i>Nannizzia polymorpha</i>     | Tinea capitis & tinea manuum     | right hand & scalp                            | Taiwan             | Sun et al. 2023                               |
| <i>Nannizzia praecox</i>      | <i>Microsporum praecox</i>      | Dermatophytosis                  | right external malleolus                      | France             | Alanio et al. 2011                            |
|                               |                                 | Tinea capitis                    | scalp                                         | USA                | Padhye et al. 1989                            |

|                                        |                                     |                                      |                                             |                                      |                                                                                                                                                                                |
|----------------------------------------|-------------------------------------|--------------------------------------|---------------------------------------------|--------------------------------------|--------------------------------------------------------------------------------------------------------------------------------------------------------------------------------|
| <i>Neoconidiobolus pachyzygosporus</i> | <i>Conidiobolus pachyzygosporus</i> | Pulmonary infection                  | lungs                                       | Switzerland                          | <a href="#">Stavropoulou et al. 2022</a>                                                                                                                                       |
|                                        |                                     | Conidiobolomycosis with dysphagia    | nasopharyngeal wall                         | India                                | Purohit et al. 2021                                                                                                                                                            |
| <i>Neocosmospora cyanescens</i>        | <i>Phialophora cyanescens</i>       | Mycetoma                             | right foot                                  | Netherlands                          | De Hoog et al. 1993                                                                                                                                                            |
| <i>Neocosmospora falciformis</i>       | <i>Fusarium falciforme</i>          | Vertebral Abscess and Osteomyelitis  | thoracolumbar spine                         | USA                                  | <a href="#">Edupuganti et al. 2011</a>                                                                                                                                         |
|                                        |                                     | Disseminated angioinvasive infection | blood & both lower legs                     | South Korea                          | <a href="#">Yun et al. 2007</a>                                                                                                                                                |
|                                        | <i>Acremonium falciforme</i>        | Eumycetoma                           | left foot                                   | China                                | Xiujiao et al. 2012                                                                                                                                                            |
|                                        |                                     | Mycetoma                             | hands and forearms                          | USA                                  | Van Etta et al. 1983                                                                                                                                                           |
| <i>Neocosmospora keratoplastica</i>    | <i>Fusarium keratoplasticum</i>     | Eumycetoma                           | legs                                        | Mexico                               | <a href="#">Al-Hatmi et al. 2017</a>                                                                                                                                           |
| <i>Neocosmospora lichenicola</i>       | <i>Cylindrocarpon lichenicola</i>   | Cutaneous Infection                  | right hand, webspaces of both hands         | Costa Rica, India, & USA             | Iwen et al. 2000, Champa et al. 2013, Lizano-Calvo et al. 2013                                                                                                                 |
|                                        |                                     | Mycetoma                             | foot                                        | Canada & Israel                      | Zoutman et al. 1991, Chazan et al. 2004                                                                                                                                        |
|                                        |                                     | Disseminated                         | blood, lungs, nails and the skin of toes    | Belgium                              | James et al. 1997, Rodríguez-Villalobos et al. 2003                                                                                                                            |
|                                        |                                     | Keratomycosis                        | eye                                         | Argentina, India, Nigeria, & UK      | Mangiaterra et al. 2001, Mitra et al. 2009, Suchitra et al. 2020, Irek et al. 2017, <a href="#">Halim et al. 2021</a>                                                          |
|                                        |                                     | Onychomycosis                        | nail of the middle finger of the right hand | Costa Rica                           | Lizano-Calvo et al. 2013                                                                                                                                                       |
|                                        |                                     | Athlete's foot (tinea pedis)         | inter-toes areas                            | Senegal                              | Diongue et al. 2016                                                                                                                                                            |
|                                        |                                     | Peritonitis                          | abdomen                                     | India                                | Sharma et al. 1998                                                                                                                                                             |
| <i>Neocosmospora petroliphila</i>      | <i>Fusarium petroliphilum</i>       | Disseminated infection               | skin (legs) & blood                         | Turkey                               | Ersal et al. 2015                                                                                                                                                              |
|                                        |                                     | Fungaemia                            | blood                                       | France                               | Dananché et al. 2015                                                                                                                                                           |
| <i>Neocosmospora pseudensiformis</i>   | <i>Fusarium pseudensiforme</i>      | Eumycetoma                           | legs                                        | Mexico                               | <a href="#">Al-Hatmi et al. 2017</a>                                                                                                                                           |
| <i>Neocosmospora solani</i>            | <i>Fusarium solani</i>              | Fungaemia                            | blood                                       | China, Slovakia, Ireland, Italy, USA | Lodato et al. 2006, Krcmery et al. 1997, O' Connell et al. 2011, <a href="#">Colombo et al. 2013</a> , <a href="#">Esnakula et al. 2013</a> , <a href="#">Kang et al. 2013</a> |
|                                        |                                     | Disseminated infections              | Skin (Right elbow),                         | Canada                               | <a href="#">Schwartz et al. 2015</a>                                                                                                                                           |

|                                |                               |                                           |                                             |                                      |                                                                                |
|--------------------------------|-------------------------------|-------------------------------------------|---------------------------------------------|--------------------------------------|--------------------------------------------------------------------------------|
|                                |                               |                                           | lung, liver, brain                          |                                      |                                                                                |
|                                |                               | Disseminated infection & fungemia         | skin lesions (face, neck, and trunk), blood | Italy                                | Venditti et al. 1988                                                           |
|                                |                               | Keratomycosis                             | eye                                         | India                                | Kulkarni et al. 2017                                                           |
|                                |                               | Onychomycosis, Cutaneous infections       | first toe & toenails                        | Brazil, Switzerland                  | Godoy et al. 2004, Jossi et al. 2010                                           |
|                                |                               | Mycetoma with osteolytic lesions          | hands & foot                                | Brazil, France                       | Tomimori-Yamashita et al. 2002, <b>Year et al. 2003</b>                        |
|                                |                               | Cutaneous lesion and swelling             | right buttock                               | India                                | Katkar et al. 2011                                                             |
|                                |                               | Burn Wound Infection                      | face, scalp, chest, abdomen, & back         | Vietnam                              | <b>Tram et al. 2020</b>                                                        |
|                                |                               | Cutaneous infection & erythematous nodule | left lower leg & right upper arm            | UK                                   | Cooke et al. 2009                                                              |
|                                |                               | Quasi-Invasive Infection                  | left heel & right forefeet,                 | India                                | Kudur et al. 2013                                                              |
| <i>Neocucurbitaria cava</i>    | <i>Phoma cava</i>             | Subcutaneous pheohyphomycosis             | skin of the right hand                      | Brazil                               | Zaitz et al 1997                                                               |
|                                |                               | subcutaneous pheohyphomycosis             | skin of the right hand                      | Brazil                               | Zaitz et al 1997                                                               |
| <i>Ovatospora brasiliensis</i> | <i>Chaetomium brasiliense</i> | Phaeohyphomycosis                         | ear                                         | Czech Republic                       | Hubka et al 2003                                                               |
|                                |                               | Phaeohyphomycosis                         | ear                                         | Czech Republic                       | Hubka et al 2003                                                               |
| <i>Paecilomyces lilacinus</i>  | <i>Paecilomyces lilacinus</i> | Keratitis                                 | eye                                         | Brazil, China, & USA                 | Pastor et al. 2006, Ford et al. 20058, Wu et al. 2010                          |
|                                |                               | Endophthalmitis                           | eye                                         | Australia, Switzerland, Spain, & USA | Domniz et al. 2001, Pintor et al. 2001, Scott et al. 2001, Garbino et al. 2002 |
|                                |                               | Pulmonary infection                       | lungs                                       | USA                                  | Liu et al. 1998                                                                |
|                                |                               | Cutaneous infection                       | legs, right knee                            | Switzerland, & USA                   | Orth et al. 1996, Hecker et al. 1997, Hall et al. 2004                         |
|                                |                               | Fungaemia                                 | blood                                       | USA                                  | Bernacer et al. 1992                                                           |
|                                |                               | Vaginitis                                 | vagina                                      | USA                                  | Carey et al. 2003                                                              |
|                                |                               | Sinusitis                                 | sinuses                                     | India                                | Nayak et al. 2000                                                              |
|                                |                               | Osteomyelitis                             | great toe                                   | USA                                  | Gompf et al. 1999                                                              |
|                                |                               | Onychomycosis                             | right great toe nail                        | UK                                   | Fletcher et al. 1998                                                           |
| <i>Paecilomyces variotii</i>   | <i>Paecilomyces variotii</i>  | Pneumonia                                 | lungs                                       | USA                                  | Feldman et al. 2016                                                            |
|                                |                               | Rhinosinusitis                            | nose and paranasal                          | India                                | Swami et al. 2016                                                              |

|                                      |                                      |                                                |                                                                                   |                 |                                                        |
|--------------------------------------|--------------------------------------|------------------------------------------------|-----------------------------------------------------------------------------------|-----------------|--------------------------------------------------------|
|                                      |                                      |                                                | sinuse                                                                            |                 |                                                        |
|                                      |                                      | Fungemia                                       | blood                                                                             | France          | Salle et al. 2005, Bellanger et al. 2017               |
|                                      |                                      | Mycetoma                                       | lungs                                                                             | Portugal        | Marques et al. 2019                                    |
|                                      |                                      | Chronic suppurative otitis                     | left ear                                                                          | India           | Dhindsa et al. 1995                                    |
|                                      |                                      | Wound Infection                                | sternum                                                                           | China           | Lee et al. 2002                                        |
|                                      |                                      | Endophthalmitis                                | eye                                                                               | Finland & India | Tarkk et al. 2004, Anita et al. 2010                   |
|                                      |                                      | Peritonitis                                    | abdomen                                                                           | Italy & Turkey  | Rinaldi et al. 2000, <a href="#">Polat et al. 2015</a> |
| <i>Papiliotrema flavescens</i>       | <i>Papiliotrema flavescens</i>       | Pulmonary infection                            | lung                                                                              | China           | <a href="#">Zhang et al.2022</a>                       |
|                                      |                                      | Pulmonary fungal infection                     | lung                                                                              | China           | <a href="#">Zhang et al.2022</a>                       |
| <i>Papiliotrema laurentii</i>        | <i>Papiliotrema laurentii</i>        | Fungemia/Catheter-related infection            | Blood                                                                             | Brazil & Turkey | Londero et al. 2019, Aydın et al. 2023                 |
| <i>Paracoccidioides americana</i>    | <i>Paracoccidioides americana</i>    | Paracoccidioidomycosis/ Disseminated infection | _                                                                                 | Brazil          | <a href="#">De Macedo et al. 2019</a>                  |
| <i>Paracoccidioides brasiliensis</i> | <i>Paracoccidioides brasiliensis</i> | Osteomyelitis                                  | leg (calcaneous bone)                                                             | Brazil          | Nogueira et al. 2001                                   |
|                                      |                                      | Disseminated infection                         | mucosal surface & respiratory tract                                               | Brazil          | <a href="#">de Macedo et al. 2016</a>                  |
|                                      |                                      | Disseminated infection                         | skin (face, lower right hemithorax, right cervical chain and ribs), lungs & brain | Brazil          | Peçanha et al. 2021                                    |
| <i>Paracoccidioides lutzii</i>       | <i>Paracoccidioides lutzii</i>       | Fungemia                                       | blood                                                                             | Brazil          | <a href="#">Hahn et al. 2014</a>                       |
|                                      |                                      | Pulmonary infection                            | upper lobes of the lungs                                                          | Brazil          | <a href="#">Marques-da-Silva et al. 2012</a>           |
| <i>Phaeoacremonium inflatipes</i>    | <i>Phaeoacremonium inflatipes</i>    | Phaeohyphomycosis                              | left foot                                                                         | USA             | Padhye et al 1998                                      |
|                                      |                                      | Cystic plantar phaeohyphomycosis               | left forefoot                                                                     | India           | Sandhu et al. 2022                                     |
|                                      |                                      | Phaeohyphomycosis                              | left foot                                                                         | USA             | Padhye et al 1998                                      |
|                                      |                                      | cystic plantar phaeohyphomycosis               | left forefoot                                                                     | India           | Sandhu et al. 2022                                     |
| <i>Phaeoacremonium parasiticum</i>   | <i>Phialophora parasitica</i>        | Eumycetoma                                     | right foot                                                                        | UK              | Hood et al. 1997                                       |
| <i>Phellinus mori</i>                | <i>Phellinus mori</i>                | Subcutaneous infection                         | right chest                                                                       | Japan           | <a href="#">Shigemura et al. 2015</a>                  |



|                                 |                                 |                             |                                                      |                |                                                       |
|---------------------------------|---------------------------------|-----------------------------|------------------------------------------------------|----------------|-------------------------------------------------------|
| <i>Phellinus undulatus</i>      | <i>Phellinus undulatus</i>      | Soft tissue infection       | right knee                                           | New Zealand    | <a href="#">Williamson et al. 2011</a>                |
| <i>Phialemonium atrogriseum</i> | <i>Acremonium atrogriseum</i>   | Keratitis                   | left eye                                             | USA            | Read et al. 2000                                      |
| <i>Phialemonium obovatum</i>    | <i>Phialemonium obovatum</i>    | Endocarditis                | septal and posterior leaflets of the tricuspid valve | USA            | Gavin et al.2002                                      |
|                                 |                                 | Lung infection              | blood                                                | USA            | Scott et al. 2005                                     |
|                                 |                                 | cutaneous phaeohyphomycosis | skin                                                 | india          | <a href="#">Sharma et al. 2021</a>                    |
|                                 |                                 | Endocarditis                | septal and posterior leaflets of the tricuspid valve | USA            | Gavin et al.2002                                      |
|                                 |                                 | Lung infection              | blood                                                | USA            | Scott et al. 2005                                     |
|                                 |                                 | cutaneous phaeohyphomycosis | skin                                                 | india          | <a href="#">Sharma et al. 2021</a>                    |
| <i>Phialophora americana</i>    | <i>Phialophora americana</i>    | Phaeohyphomycosis           | face                                                 | China          | <a href="#">Huang et al. 2019</a>                     |
| <i>Phialophora chinensis</i>    | <i>Phialophora chinensis</i>    | Keratitis                   | right eye                                            | USA            | <a href="#">Ply et al. 2023</a>                       |
| <i>Phialophora europaea</i>     | <i>Phialophora europaea</i>     | Cutaneous & nail infections | Legs & nails                                         | Netherlands    | <a href="#">De Hoog et al. 2000</a>                   |
| <i>Phialophora richardsiae</i>  | <i>Phialophora richardsiae</i>  | Chromoblastomycosis         | right patella & right shin                           | Canada & Korea | Jumaa et al. 1995, Levenstadt et al. 2012             |
| <i>Phialophora verrucosa</i>    | <i>Phialophora verrucosa</i>    | Phaeohyphomycosis           | face & gluteal region                                | China & Japan  | Ohira et al. 2002, Tong et al. 2013                   |
|                                 |                                 | Chromoblastomycosis         | feet & legs                                          | Korea          | Park et al. 2005                                      |
| <i>Phoma herbarum</i>           | <i>Phoma herbarum</i>           | Onychomycosis               | Skin & nails                                         | Italy          | <a href="#">Tullio et al. 2010</a>                    |
| <i>Pichia fermentans</i>        | <i>Candida lambica</i>          | Fungemia                    | bood                                                 | Belgium        | <a href="#">Vervaeke et al. 2008</a>                  |
|                                 |                                 | Polyarthritits              | joints                                               | USA            | Trowbridge et al. 1999                                |
| <i>Pichia kudriavzevii</i>      | <i>Candida krusei</i>           | Vaginitis                   | vagina                                               | USA            | Singh et al. 2002                                     |
|                                 |                                 | Septic arthritis            | left and right knees                                 | China & USA    | Guyen and Penn 1987, Wang et al. 2007, Lu et al. 2012 |
|                                 |                                 | Fungemia                    | blood                                                | USA            | Abbas et al. 2000, Lin et al. 2005                    |
|                                 |                                 | Sternal osteomyelitis       | sternum                                              | Greece         | Petrikkos et al. 2001                                 |
|                                 |                                 | Spondylodiscitis            | vertebrae                                            | Spain          | <a href="#">Pemán et al. 2006</a>                     |
|                                 |                                 | Candidemia                  | blood                                                | India          | Kaur et al. 2020                                      |
| <i>Piedraia hortae</i>          | <i>Piedraia hortae</i>          | black piedra                | scalp                                                | Spain & Sweden | Gip 1994, Piquero-Casals et al. 2023                  |
| <i>Pleurostoma hongkongense</i> | <i>Pleurostoma hongkongense</i> | Phaeohyphomycosis           | liver                                                | Hong Kong      | <a href="#">Tsang et al. 2021</a>                     |

|                                  |                                  |                                                  |                                                                   |                              |                                                                                                    |
|----------------------------------|----------------------------------|--------------------------------------------------|-------------------------------------------------------------------|------------------------------|----------------------------------------------------------------------------------------------------|
| <i>Pleurostoma ootheca</i>       | <i>Pleurostoma ootheca</i>       | Phaeohyphomycosis                                | left ankle                                                        | France                       | Amazan et al. 2014                                                                                 |
| <i>Pneumocystis carinii</i>      | <i>Pneumocystis carinii</i>      | Acute diffuse pneumonia                          | Bronchoalveolar lavage fluid                                      | Zimbabwe                     | Malin et al. 1995                                                                                  |
|                                  |                                  | Acute diffuse pneumonia                          | Bronchoalveolar lavage fluid                                      | Zimbabwe                     | Malin et al. 1995                                                                                  |
| <i>Pneumocystis jirovecii</i>    | <i>Pneumocystis jirovecii</i>    | COVID-19 and fungal Coinfection                  | respiratory tract                                                 | USA                          | Menon et al. 2020                                                                                  |
|                                  |                                  | Pneumonia                                        | lungs                                                             | France, UK & USA             | De Castro et al. 2010, Cawcutt et al. 2014, Chen et al. 2020, Coleman et al. 2020                  |
| <i>Porostereum spadiceum</i>     | <i>Porostereum spadiceum</i>     | Pneumonia                                        | respiratory Tract Infection                                       | Korea                        | Lee et al. 2020                                                                                    |
| <i>Rhinoclatiella aquaspersa</i> | <i>Rhinoclatiella aquaspersa</i> | Chromoblastomycosis (cutaneous infection)        | left hand & right leg                                             | Brazil, Guatemala, & México  | González et al. 2013, Campos et al. 2018, Porras-López et al. 2019                                 |
| <i>Rhinoclatiella basitona</i>   | <i>Rhinoclatiella basitona</i>   | Phaeohyphomycosis                                | face                                                              | China                        | Cai et al. 2013                                                                                    |
|                                  |                                  | Endophthalmitis                                  | right eye                                                         | China                        | Liu et al. 2015                                                                                    |
| <i>Rhinoclatiella mackenziei</i> | <i>Rhinoclatiella mackenziei</i> | Cerebral phaeohyphomycosis                       | brain                                                             | Iran, Saudi Arabia, & Turkey | Mohammadi et al. 2018, Al-Tawfiq and Boukhamseen 2011, Didehdar et al. 2015, Kucukkaya et al. 2023 |
|                                  |                                  | Disseminated infection                           | abdomen, lungs, & brain                                           | Kuwait                       | Al Otaibi et al. 2021                                                                              |
| <i>Rhinoclatiella similis</i>    | <i>Rhinoclatiella similis</i>    | Chromoblastomycosis                              | left palm, chest, & foot                                          | Brazil, Spain                | Heidrich et al. 2017, de Andrade et al. 2020                                                       |
| <i>Rhizomucor pusillus</i>       | <i>Rhizomucor pusillus</i>       | Disseminated infection                           | brain, myocardium, liver, pancreas, spleen, colon, & both kidneys | Germany                      | Schober et al. 2021                                                                                |
|                                  |                                  | Fungemia                                         | blood                                                             | USA                          | Bard et al. 2014                                                                                   |
|                                  |                                  | Pulmonary infection                              | lungs (left upper lobe)                                           | Australia                    | Ma et al. 2001                                                                                     |
|                                  |                                  | Sinus-Orbital infection                          | right eye & sinuses                                               | Canada                       | Iwen et al. 2005                                                                                   |
|                                  |                                  | Cerebral infection                               | left temporal lobe brain                                          | USA                          | Farid et al. 2017                                                                                  |
|                                  |                                  | Pulmonary, rhino-orbital and cutaneous infection | sinuses, lungs, left neck, & left shoulder                        | Germany                      | Hadaschik et al. 2012                                                                              |
| <i>Rhizopus arrhizus</i>         | <i>Rhizopus arrhizus</i>         | Rhinosinusitis mucormycosis                      | necrotic eschars on the palate                                    | Iran                         | Tabarsi et al. 2021                                                                                |

|                               |                               |                                                 |                                                             |                 |                                                                   |
|-------------------------------|-------------------------------|-------------------------------------------------|-------------------------------------------------------------|-----------------|-------------------------------------------------------------------|
|                               |                               | Rhino-orbital-cerebral mycosis                  | midline face ulcers                                         | China           | Li et al. 2021                                                    |
|                               |                               | Primary cerebral zygomycosis                    | fluid aspirated from a brain mass                           | Italy           | Oliveri et al. 1988                                               |
|                               |                               | COVID-19-associated rhinosinusitis mucormycosis | necrotic eschars on the palate                              | Iran            | Tabarsi et al. 2021                                               |
|                               |                               | Rhino-Orbital-Cerebral Mycosis                  | midline face ulcers                                         | China           | Li et al. 2021                                                    |
|                               |                               | primary cerebral zygomycosis                    | fluid aspirated from a brain mass                           | Italy           | Oliveri et al. 1988                                               |
| <i>Rhizopus microsporus</i>   | <i>Rhizopus microsporus</i>   | Pulmonary infection                             | lungs                                                       | Mexico          | Fernández-García et al. 2021                                      |
| <i>Saksenaea erythrospora</i> | <i>Saksenaea erythrospora</i> | Disseminated Infection                          | burn wound infections (head, arms, & legs), left orbit      | USA             | Hospenthal et al. 2011                                            |
|                               |                               | Necrotizing skin and soft tissue infections     | left shoulder, left axillary region, & right gluteal region | India           | Chander et al. 2017                                               |
|                               |                               | Skin and soft tissue infection                  | right breast                                                | Colombia        | Rodríguez et al. 2016                                             |
|                               |                               | Necrotizing infection                           | medial canthal region of her right eye                      | India           | Mukherjee and Kundu 2018                                          |
|                               |                               | Rhinosinusitis                                  | eye, rightsided facial palsy, & neck                        | India           | Tendolkar et al. 2015                                             |
|                               |                               | Periocular Cutaneous infection                  | right medial canthus & upper cheek                          | Thailand        | Putthirangsiwong et al. 2019                                      |
| <i>Saksenaea vasiformis</i>   | <i>Saksenaea vasiformis</i>   | Cutaneous infection                             | abdomen, left cheek, right elbow, & thighs                  | Greece & India  | Chakrabarti et al. 1997, Padmaja et al. 2006, Gkegkes et al. 2019 |
|                               |                               | Cutaneous infection                             | right gluteal region                                        | Ecuador & India | Vega et al. 2006, Kaushik et al. 2012                             |
|                               |                               | Subcutaneous infection                          | anterior abdominal region & left cheek                      | India           | Padmaja et al. 2006, Baradkar and Kumar 2009                      |
|                               |                               | Disseminated infection                          | mitral valve, lungs, & skin                                 | Australia       | Solano et al. 2000                                                |
|                               |                               | Osteomyelitis                                   | medial, lateral, & anterior distal tibia                    | USA             | Pierce et al. 1987                                                |
| <i>Sarocladium kiliense</i>   | <i>Acremonium kiliense</i>    | Keratitis                                       | eye                                                         | USA             | Weissgold et al. 1998                                             |

|                                 |                                 |                                                                     |                                                 |                           |                                                                 |
|---------------------------------|---------------------------------|---------------------------------------------------------------------|-------------------------------------------------|---------------------------|-----------------------------------------------------------------|
|                                 |                                 | Fungemia and lung infection                                         | blood & lungs                                   | Brazil                    | Júnior et al. 2013                                              |
|                                 |                                 | Fungemia                                                            | blood                                           | Greece & USA              | Ioakimidou et al. 2013, Perdomo et al. 2011                     |
|                                 |                                 | Hilar pneumonia                                                     | right lung                                      | Brazil                    | Pastorino et al. 2005                                           |
|                                 |                                 | Peritonitis                                                         | abdomen                                         | Brazil                    | Lopes et al. 1995                                               |
|                                 |                                 | Mycetoma                                                            | left fascio-maxillary area                      | India                     | Agarwal et al. 2011                                             |
|                                 |                                 | Peritonitis                                                         | abdomen                                         | Turkey                    | Koç et al. 1998, Sener et al. 2008                              |
|                                 |                                 | Skin infection                                                      | legs                                            | Greece & Turkey           | Miyakis et al. 2006, Hilmioglu et al. 2015                      |
|                                 |                                 | Cutaneous Hyalohyphomycosis                                         | right foot                                      | India                     | Sharma et al. 2013                                              |
|                                 |                                 | Fungaemia                                                           | blood                                           | France                    | Hitoto et al. 2010                                              |
|                                 |                                 | Disseminated infection                                              | gastrointestinal system, skin, & blood          | USA                       | Schell et al. 1996                                              |
|                                 |                                 | Erythema                                                            | right cheek                                     | Turkey                    | Anadolu et al. 2001                                             |
| <i>Scedosporium apiospermum</i> | <i>Scedosporium apiospermum</i> | Disseminated infections,                                            | CNS and cutaneous infections                    | Belgium & Spain           | Montejo et al. 2002, Symoens et al. 2006                        |
|                                 |                                 | Septic Arthritis                                                    | right knee                                      | Spain                     | Tirado-Miranda et al. 2001                                      |
|                                 |                                 | Keratitis/sclerokeratitis                                           | eye                                             | India & USA               | Ramakrishnan et al. 2018, Wu et al. 2002                        |
|                                 |                                 | Cutaneous infection                                                 | right hand                                      | UK                        | Uenotsuchi et al. 2005                                          |
|                                 |                                 | Disseminated infections                                             | blood, lungs, skin, & CNS                       | Spain                     | Husain et al. 2005                                              |
| <i>Scedosporium boydii</i>      | <i>Scedosporium boydii</i>      | Keratitis                                                           | eye                                             | India & USA               | Wu et al. 2002, Ramakrishnan et al. 2018                        |
|                                 |                                 | Pulmonary Infections                                                | lungs                                           | France                    | Jabado et al. 1998                                              |
| <i>Schizophyllum commune</i>    | <i>Schizophyllum commune</i>    | Allergic Broncho-Pulmonary Mycosis (ABPM) and pulmonary fungal ball | lungs                                           | India & Japan             | Kamei et al. 1994, Ogawa et al. 2012, Chowdhary et al. 2013     |
|                                 |                                 | Chronic non-invasive rhinosinusitis                                 | left sphenoid sinus and posterior ethmoid sinus | Italy                     | Cavanna et al. 2019                                             |
|                                 |                                 | Keratitis                                                           | eye                                             | India                     | Saha et al. 2013                                                |
|                                 |                                 | Pneumonia                                                           | lungs                                           | Korea                     | Kim et al. 2022                                                 |
|                                 |                                 | Maxillary Sinusitis                                                 | left frontal and maxillary sinuses              | Canada, Colombia, & India | Sigler et al. 1997, 1999, Castro et al. 2010, Swain et al. 2011 |
|                                 |                                 | Sinusitis and frontal brain abscess                                 | right frontal brain & bilateral sinusitis       | Austria                   | Hoenigl et al. 2013                                             |

|                                  |                                  |                                          |                                              |                  |                                                                 |
|----------------------------------|----------------------------------|------------------------------------------|----------------------------------------------|------------------|-----------------------------------------------------------------|
|                                  |                                  | Sinusitis                                | paranasal sinuses                            | Japan            | Taguchi et al. 2007                                             |
| <i>Sporothrix brasiliensis</i>   | <i>Sporothrix brasiliensis</i>   | Dacryocystitis                           | lower corner of the left eye                 | Brazil           | Marques de Macedo et al. 2015                                   |
|                                  |                                  | Disseminated infection                   | mitral valve, eyes, & lymph nodes            | Brazil           | Silva-Vergara et al. 2012                                       |
|                                  |                                  | disseminated cutaneous sporotrichosis    | face and hands                               | Brazil           | Valeriano et al. 2020                                           |
|                                  |                                  | Invasive Sinusitis                       | paranasal and maxillary sinuses              | Brazil           | Araújo et al. 2021                                              |
| <i>Sporothrix globosa</i>        | <i>Sporothrix globosa</i>        | Sporotrichosis scaly erythematous lesion | left arm                                     | Brazil           | Gompertz et al. 2016                                            |
|                                  |                                  | Sporotrichosis Skin lesios               | hands                                        | Japan            | Watanabe et al. 2016                                            |
|                                  |                                  | Cutaneous Sporotrichosis                 | right upper eyelid                           | China            | Liu et al. 2021                                                 |
| <i>Sporothrix schenckii</i>      | <i>Sporothrix schenckii</i>      | Monoarthritis                            | right knee                                   | Brazil & USA     | Appenzeller et al. 2006, Barbaryan et al. 2018                  |
|                                  |                                  | Subcutaneous infection                   | legs                                         | Turkey           | Koç et al. 2001                                                 |
| <i>Syncephalastrum racemosum</i> | <i>Syncephalastrum racemosum</i> | Pneumonia                                | lungs                                        | Mexico           | Rodríguez-Gutiérrez et al. 2015                                 |
|                                  |                                  | Gastrointestinal infection               | gastrointestinal tract                       | India            | Raju et al. 2020                                                |
|                                  |                                  | Subcutaneous mucormycosis                | anterior chest wall in the left side         | India            | Mangaraj et al. 2014                                            |
|                                  |                                  | Onychomycosis                            | left great toe nail, right great toenail     | India & Serbia   | Pavlovic and Bulajic 2006, Baby et al. 2015, Jindal et al. 2016 |
|                                  |                                  | Intraabdominal Zygomycosis               | abdomen                                      | Australia        | Schlebusch and Looke et al. 2005                                |
| <i>Talaromyces amestolkiae</i>   | <i>Talaromyces amestolkiae</i>   | Lymphadenitis                            | inguinal lymph node                          | Taiwan           | Wang et al. 2023                                                |
|                                  |                                  | Pulmonary infection                      | lungs                                        | Mexico           | Villanueva-Lozano et al. 2017                                   |
| <i>Talaromyces marneffe</i>      | <i>Talaromyces marneffe</i>      | Talaromycosis                            | intestine, oropharynx and larynx             | China & Thailand | Pan et al. 2020, Wongkamhla et al. 2019                         |
| <i>Talaromyces purpurogenus</i>  | <i>Talaromyces purpurogenus</i>  | Pulmonary infection                      | lungs                                        | Turkey           | Atalay et al. 2016                                              |
|                                  |                                  | Otomycosis                               | ear canal                                    | Iran             | Aboutalebian et al. 2020                                        |
| <i>Thyridium curvatum</i>        | <i>Phialemonium curvatum</i>     | sporadic infections                      | bolld and intervertebral disc-space aspirate | Spain            | Rivero et al. 2009                                              |
|                                  |                                  | Endophthalmitis                          | eye                                          | Israel, Norway   | Zayit-Soudry et al. 2005, Navaratnam et al.2022                 |

|                                    |                                    |                              |                                                                            |                          |                                                                 |
|------------------------------------|------------------------------------|------------------------------|----------------------------------------------------------------------------|--------------------------|-----------------------------------------------------------------|
|                                    |                                    | sporadic infections          | bolld and<br>intervertebral disc-<br>space aspirate                        | Spain                    | <a href="#">Rivero et al. 2009</a>                              |
|                                    |                                    | Endophthalmitis              | eye                                                                        | Israel, Norway           | Zayit-Soudry et al. 2005, <a href="#">Navaratnam et al.2022</a> |
| <i>Tintelnotia destructans</i>     | <i>Tintelnotia destructans</i>     | Keratitis                    | right eye                                                                  | Belgium &<br>Switzerland | Roels et al. 2020, Kaufmann et al. 2021                         |
|                                    |                                    | Cornea and nail infections   | eye and nails                                                              | Germany                  | <a href="#">Ahmed et al. 2017</a>                               |
| <i>Trematosphaeria grisea</i>      | <i>Madurella grisea</i>            | Mycetoma                     | left wrist                                                                 | India                    | Ankad et al. 2019                                               |
| <i>Trichoderma atroviride</i>      | <i>Trichoderma atroviride</i>      | Ischemic necrosis            | liver                                                                      | France                   | Ranque et al. 2008                                              |
| <i>Trichoderma citrinoviride</i>   | <i>Trichoderma citrinoviride</i>   | Pneumonia                    | right lung                                                                 | Lithuania                | Kviliute et al. 2008                                            |
| <i>Trichoderma harzianum</i>       | <i>Trichoderma harzianum</i>       | Disseminated infections      | blood, brain, lungs,<br>skin, sputum, &<br>throat                          | Spain & Turkey           | Guarro et al. 1999, <a href="#">Kantarcioğlu et al. 2009</a>    |
| <i>Trichoderma koningii</i>        | <i>Trichoderma koningii</i>        | Peritonitis                  | abdomen                                                                    | Spain                    | Ragnaud et al. 1984, Campos-Herrero et al. 1996                 |
| <i>Trichoderma longibrachiatum</i> | <i>Trichoderma longibrachiatum</i> | Skin graft infection         | upper right<br>extremity                                                   | Czech Republic           | <a href="#">Lipový et al. 2021</a>                              |
|                                    |                                    | Skin infection               | Skin                                                                       | Tunisia                  | Trabelsi et al. 2010                                            |
|                                    |                                    | Invasive pulmonary infection | right pulmonary<br>vessels                                                 | France                   | <a href="#">Sautour et al. 2018</a>                             |
|                                    |                                    | Otitis Externa               | right eardrum and a<br>partial anterior<br>perforation on the<br>left side | France                   | Hennequin et al. 2000                                           |
|                                    |                                    | Necrotizing stomatitis       | upper left gingiva                                                         | Japan                    | Myoken et al. 2002                                              |
|                                    |                                    | Chronic sinusitis            | paranasal sinuses                                                          | Canada                   | Tang et al. 2003                                                |
|                                    |                                    | Endocarditis                 | Cardiac Implantable<br>Electronic Device)-<br>Associated                   | Italy                    | <a href="#">Tascini et al. 2016</a>                             |
| <i>Trichoderma pseudokoningii</i>  | <i>Trichoderma pseudokoningii</i>  | Disseminated infection,      | lungs, brain, heart,<br>& stomach                                          | France                   | Gautheret et al. 1995                                           |
|                                    |                                    | Peritonitis                  | abdomen                                                                    | France                   | Rota et al. 2000                                                |
| <i>Trichoderma viride</i>          | <i>Trichoderma viride</i>          | Pulmonary infection          | right upper lobe<br>lung                                                   | Spain                    | De Miguel et al. 2005                                           |
|                                    |                                    | Perihepatic hematoma         | peritoneal fluid                                                           | Belgium                  | Jacobs et al. 1992                                              |

|                                    |                                                         |                                                     |                                                                                 |                     |                                                                    |
|------------------------------------|---------------------------------------------------------|-----------------------------------------------------|---------------------------------------------------------------------------------|---------------------|--------------------------------------------------------------------|
| <i>Trichophyton benhamiae</i>      | <i>Arthroderma benhamiae</i>                            | Tinea corporis                                      | left medial thigh, right ilium, & lumbar region                                 | Brazil & Japan      | de Freitas et al. 2019, Nakamura et al. 2020                       |
| <i>Trichophyton mentagrophytes</i> | <i>Trichophyton mentagrophytes</i>                      | Superficial dermatophytosis                         | trunk, groins, face and foot                                                    | India               | Nenoff et al. 2019                                                 |
|                                    |                                                         | Dermatophytosis                                     | left breast, arms, face, groin, & ears                                          | Iran & Nigeria      | Enweani et al. 1996, Pakshir and Hashemi 2006, Fattahi et al. 2021 |
|                                    |                                                         | Kerion Celsi                                        | scalp                                                                           | Korea & Netherlands | Jang et al. 2002, Jaspers et al. 2011                              |
|                                    |                                                         | Tinea Faciei                                        | nostrils                                                                        | Japan               | Kimura et al. 2015                                                 |
|                                    |                                                         | Tinea corporis                                      | left lateral wall of the chest & left shoulder                                  | India               | Raonand Datta 2013                                                 |
|                                    |                                                         | Kerion                                              | vulva                                                                           | Canada              | Bougrine et al. 2015                                               |
|                                    |                                                         | Majocchi's granuloma                                | vulva                                                                           | Korea               | Chang et al. 2005                                                  |
|                                    | <i>Trichophyton mentagrophytes</i> var. <i>erinacei</i> | Tinea manuum                                        | left hand                                                                       | Korea               | Rhee et al. 2009                                                   |
|                                    | <i>Trichophyton mentagrophytes</i> var. <i>erinacei</i> | Tinea faciei                                        | nose                                                                            | Chile               | Concha et al. 2012                                                 |
|                                    | <i>Arthroderma vanbreuseghemii</i>                      | Kerion & tinea corporis                             | scalp, face, & trunk                                                            | China               | Zhang et al. 2009                                                  |
|                                    |                                                         | Tinea Faciei                                        | Face (left cheek & nostrils)                                                    | China & Japan       | Noguchi et al. 2010, Kang et al. 2013, Su-yang et al. 2016         |
| <i>Trichophyton rubrum</i>         | <i>Trichophyton rubrum</i>                              | Chronic dermatophytosis                             | nails, hands, feets, trunk, legs, trunk, & buttocks                             | Brazil              | Sadahiro et al. 2004, Sousa et al. 2015                            |
|                                    |                                                         | Deep dermatophytosis                                | trunk, ear, scalp, eft groin and scrotum area, ubmandibular area, neck, & chest | China               | Gong et al. 2007, Su et al. 2017, Huang et al. 2019                |
|                                    |                                                         | Dermatophytosis                                     | scalp and skin                                                                  | Iran & Nigeria      | Enweani et al. 1996, Pakshir and Hashemi 2006                      |
|                                    |                                                         | Onychomycosis                                       | toenails                                                                        | USA                 | Ploysangam et al. 1997                                             |
|                                    |                                                         | Majocchi's granuloma & deep skin Infection          | submandibular area, neck, and chest                                             | China               | Su et al. 2017                                                     |
|                                    |                                                         | Deep skin Infection (multiple subcutaneous nodules) | both legs                                                                       | Israel              | Nir-Paz et al. 2003                                                |



|                                  |                                  |                                               |                                                |                                      |                                                                                                                                           |
|----------------------------------|----------------------------------|-----------------------------------------------|------------------------------------------------|--------------------------------------|-------------------------------------------------------------------------------------------------------------------------------------------|
| <i>Trichophyton schoenleinii</i> | <i>Trichophyton schoenleinii</i> | Pseudomycetoma                                | scalp                                          | France & USA                         | Botterel et al. 2001, Castro-Echeverry et al. 2017                                                                                        |
|                                  |                                  | Tinea capitis                                 | scalp                                          | Italy                                | Romano et al. 2002                                                                                                                        |
| <i>Trichophyton tonsurans</i>    | <i>Trichophyton tonsurans</i>    | Tinea capitis/Kerion Celsi                    | scalp                                          | France, Iran, Italy, Japan & Nigeria | Enweani et al. 1996, Pakshir and Hashemi 2006, Torres-Guerrero et al. 2015, <b>Gits-Muselli et al. 2017, Yasuda-Sekiguchi et al. 2022</b> |
|                                  |                                  | Tinea corporis                                | left lateral wall of the chest & left shoulder | India                                | Raonand Datta 2013                                                                                                                        |
| <i>Trichophyton verrucosum</i>   | <i>Trichophyton verrucosum</i>   | Tinea corporis, tinea faciei, & tinea capitis | face, scalp, head, arms & legs                 | Australia                            | Maslen 2000                                                                                                                               |
|                                  |                                  | Skin infections                               | left mid-calf and thigh, & face                | Ireland                              | O'Gorman et al. 2015                                                                                                                      |
| <i>Trichophyton violaceum</i>    | <i>Trichophyton violaceum</i>    | Dermatophytosis (disseminated infections)     | chest, face, & extremities                     | India & Iran                         | Pakshir and Hashemi 2006, Surpam et al. 2006                                                                                              |
|                                  |                                  | Tinea capitis                                 | scalp & palms                                  | Greece, Italy, & USA                 | Vazquez-Lopez et al. 2011, Valari et al. 2012, Grigoryan et al. 2019                                                                      |
|                                  |                                  | Tinea capitis                                 | scalp, neck, & shoulders                       | China                                | Yu et al. 2004                                                                                                                            |
|                                  |                                  | Bullous tinea pedis                           | left foot                                      | Italy                                | Romano et al. 2006                                                                                                                        |
|                                  |                                  | Tinea corporis                                | forehead & cheeks                              | India                                | Smriti et al. 2015                                                                                                                        |
|                                  | <i>Trichophyton soudanense</i>   | Tinea capitis                                 | Scalp                                          | Africa, Italy, Spain, & USA          | Romano et al. 2002, Ghilardi et al. 2007, Cetner et al. 2009, Rezusta et al. 2011, Grigoryan et al. 2019, Markey et al. 2003              |
|                                  |                                  | Endonyx onychomycosis                         | Fingernails                                    | Somalia                              | Fletcher et al. 2001                                                                                                                      |
| <i>Trichosporon asahii</i>       | <i>Trichosporon asahii</i>       | Endocarditis                                  | prosthetic aortic valve                        | Italy                                | Mulè et al. 2023                                                                                                                          |
|                                  |                                  | Bloodstream Co-infection                      | blood                                          | Brazil                               | Benelli et al. 2022                                                                                                                       |
|                                  |                                  | Disseminated trichosporonosis                 | sputum & blood                                 | India                                | Silva et al. 2003, <b>Chowdhary et al. 2004</b>                                                                                           |
|                                  |                                  | Urinary tract infection                       | urinary tract                                  | Chile & India                        | Sood et al. 2006                                                                                                                          |
|                                  |                                  | prosthetic infection                          | knee                                           | China                                | Zuo et al. 2015                                                                                                                           |
|                                  |                                  | Fungemia                                      | blood                                          | Japan & Taiwan                       | Izumi et al. 2009, Shang et al. 2010                                                                                                      |
|                                  |                                  | Pneumonia                                     | lungs                                          | Spain                                | Segrelles-Calvo et al. 2021                                                                                                               |
| <i>Trichosporon beigeli</i>      | <i>Trichosporon beigeli</i>      | Bloodstream Infection                         | blood                                          | Georgia                              | Hajjeh and Blumberg 1995                                                                                                                  |
|                                  |                                  | Disseminated infections                       | urine, skin, & blood                           | UK                                   | Fisher et al. 1993, Sweet Reid 1998                                                                                                       |

|                                 |                                 |                                  |                       |                              |                                                                                       |
|---------------------------------|---------------------------------|----------------------------------|-----------------------|------------------------------|---------------------------------------------------------------------------------------|
| <i>Trichosporon cutaneum</i>    | <i>Trichosporon cutaneum</i>    | Eczema                           | hands                 | Japan                        | Nakagawa et al. 2000                                                                  |
|                                 |                                 | Disseminated Infections          | blood                 | Japan                        | Kataoka-Nishimura et al. 1998                                                         |
|                                 |                                 | Folliculitis and septicaemia     | face, chest, & legs   | South Korea                  | Chang et al. 2005                                                                     |
| <i>Trichosporon inkin</i>       | <i>Trichosporon inkin</i>       | White Piedra                     | scalp                 | India                        | <a href="#">Shivaprakash et al. 2011</a> , Tendolkar et al. 2014                      |
|                                 |                                 | Meningitis                       | brain and spinal cord | Brazil                       | <a href="#">Milan et al. 2018</a>                                                     |
|                                 |                                 | Peritonitis                      | abdomen               | USA                          | Madariaga et al. 2003                                                                 |
| <i>Trichosporon mucoides</i>    | <i>Trichosporon mucoides</i>    | Fungemia                         | blood                 | USA                          | Lacasse and Cleveland 2009                                                            |
|                                 |                                 | Onychomycosis                    | fungernails           | India & Italy                | Sageerabanoo et al. 2011, Rizzitelli et al. 2016+                                     |
|                                 |                                 | Endocarditis                     | Prosthetic valve      | South Korea, Canada          | <a href="#">Oh et al. 2020</a> , Tse et al. 2022                                      |
|                                 |                                 | white piedra                     | scalp                 | India                        | Tendolkar et al. 2014                                                                 |
|                                 |                                 | Peritonitis                      | abdomen               | Taiwan                       | Chen et al. 2013                                                                      |
| <i>Trichosporon ovoides</i>     | <i>Trichosporon ovoides</i>     | White Piedra                     | Scalp                 | India & Netherlands          | Taj-Aldeen et al. 2004, Tambe et al. 2009                                             |
|                                 |                                 | Subcutaneous Infection           | legs                  | Malaysia                     | <a href="#">Tap et al. 2016</a>                                                       |
|                                 |                                 | Invasive pulmonary infection     | lungs                 | USA                          | <a href="#">Wynne et al. 2004</a> , Padhi et al. 2014                                 |
| <i>Tropicoporus detonsus</i>    | <i>Inonotus tropicalis</i>      | Sacral osteomyelitis             | left lumbar spine     | USA                          | Davis et al. 2007                                                                     |
|                                 |                                 | Keratitis                        | right eye             | India                        | <a href="#">Gupta et al. 2022</a>                                                     |
|                                 |                                 | Osteomyelitis                    | spine & right knee    | USA                          | Nguyen et al. 2009                                                                    |
| <i>Volvariella volvacea</i>     | <i>Volvariella volvacea</i>     | Disseminated infection           | skin, lung, & brain   | China, Malaysia, & Singapore | <a href="#">Chew et al. 2019</a>                                                      |
|                                 |                                 | Disseminated                     | lungs and brain       | Barbados & Singapore         | <a href="#">Salit et al. 2010</a> , Da et al. 2021                                    |
|                                 |                                 | Endocarditis and brain infection | heart & brain         | Taiwan                       | <a href="#">Tien et al. 2020</a>                                                      |
| <i>Wickerhamomyces anomalus</i> | <i>Candida pelliculosa</i>      | Fungemia                         | blood                 | Korea, Taiwan, Turkey, & USA | Chan et al. 2013, Lin et al. 2013 <a href="#">Jung et al. 2013</a> , Otag et al. 2015 |
|                                 |                                 | Endophthalmitis,                 | eye                   | Turkey                       | Esgin et al. 2014                                                                     |
|                                 |                                 | Meningitis                       | left eye and brain    | UK                           | Ratcliffe et al. 2011                                                                 |
|                                 |                                 | Osteomyelitis                    | left knee             | Korea                        | <a href="#">Song et al. 2020</a>                                                      |
|                                 | <i>Wickerhamomyces anomalus</i> | Fungemia                         | blood                 | Brazil, India, & Iran        | <a href="#">Dutra et al. 2020</a> , Mehta et al. 2020, Aboutalebian et al. 2022       |
|                                 |                                 | Keratitis                        | eye                   | Japan                        | <a href="#">Kamoshita et al. 2015</a>                                                 |
|                                 |                                 | Endophthalmitis                  | eye                   | Spain                        | Galván Ledesma et al. 2022                                                            |
| <i>Xenoacremonium recifei</i>   | <i>Acremonium recifei</i>       | Subcutaneous hyalohyphomycosis   | right hand            | Brazil                       | Zaitz et al. 1995                                                                     |

- Studies that have used molecular-based techniques to identify the pathogens are indicated in red.

## References

Abbas, J., Bodey, G.P., Hanna, H.A., Mardani, M., Girgawy, E., Abi-Said, D., Whimbey, E., Hachem, R. and Raad, I., 2000. *Candida krusei* fungemia: an escalating serious infection in immunocompromised patients. Archives of internal medicine, 160(17), pp.2659-2664.

Abolghasemi, S., Hakamifard, A., Sharifynia, S., Pourabdollah Toutkaboni, M. and Azhdari Tehrani, H., 2021. Fatal invasive pulmonary aspergillosis in an immunocompetent patient with COVID-19 due to *Aspergillus terreus*: A case study. Clinical Case Reports, 9(4), pp.2414-2418.

Aboutalebian, S., Mirhendi, H., Eshaghi, H., Nikmaesh, B. and Charsizadeh, A., 2022. The first case of *Wickerhamomyces anomalus* fungemia in Iran in an immuneodeficient child, a review on the literature. Journal of Medical Mycology, p.101351.

Abuali, M.M., Posada, R., Del Toro, G., Roman, E., Ramani, R., Chaturvedi, S., Chaturvedi, V. and LaBombardi, V.J., 2009. *Rhizomucor variabilis* var. *regularior* and *Hormographiella aspergillata* infections in a leukemic bone marrow transplant recipient with refractory neutropenia. Journal of clinical microbiology, 47(12), pp.4176-4179.

Adams, E., Quinn, M., Tsay, S., Poirot, E., Chaturvedi, S., Southwick, K., Greenko, J., Fernandez, R., Kallen, A., Vallabhaneni, S. and Haley, V., 2018. *Candida auris* in healthcare facilities, New York, USA, 2013–2017. Emerging infectious diseases, 24(10), p.1816.

Agrawal, A. and Singh, S.M., 1995. Two cases of cutaneous phaeohyphomycosis caused by *Curvularia pallescens*: Zwei Fälle kutaner Phaeohyphomykose bedingt durch *Curvularia pallescens*. Mycoses, 38(7-8), pp.301-303.

Agarwal, S., Capoor, M.R., Ramesh, V., Rajni, R. and Khanna, G., 2011. First case of *Acremonium kiliense* mycetoma in a New Delhi resident: A brief review. Journal de mycologie médicale, 21(2), pp.130-133.

Agarwal, K., Kathuria, S., Sundar, G., Singh, P., Khanna, G. and Chowdhary, A., 2014. A case of allergic fungal rhinosinusitis due to *Ceratocystis adiposa*. Diagnostic Microbiology and Infectious Disease, 78(2), pp.196-198.

Aguirre, C., Euliarte, C., Finkelievich, J., de los Ángeles Sosa, M. and Giusiano, G., 2015. Fungemia and interstitial lung compromise caused by *Malassezia sympodialis* in a pediatric patient. Revista Iberoamericana de Micología, 32(2), pp.118-121.

Ahmed, S.A., Abbas, M.A., Jouvion, G., Al-Hatmi, A.M., de Hoog, G.S., Kolečka, A. and Mahgoub, E.S., 2015. Seventeen years of subcutaneous infection by *Aspergillus flavus*; eumycetoma confirmed by immunohistochemistry. Mycoses, 58(12), pp.728-734.

Ahmed, S.A., Hofmüller, W., Seibold, M., De Hoog, G.S., Harak, H., Tammer, I., Van Diepeningen, A.D. and Behrens-Baumann, W., 2017. *Tintelnotia*, a new genus in *Phaeosphaeriaceae* harbouring agents of cornea and nail infections in humans. Mycoses, 60(4), pp.244-253.

Aït-Ammar, N., Levesque, E., Murat, J.B., Imbert, S., Foulet, F., Dannaoui, E. and Botterel, F., 2018. *Aspergillus pseudodeflectus*: a new human pathogen in liver transplant patients. BMC Infectious Diseases, 18(1), pp.1-6.

Ajello, L., Padhye, A.A., Chandler, F.W., McGinnis, M.R., Morganti, L. and Alberici, F., 1985. *Fusarium moniliforme*, a new mycetoma agent restudy of a European case. European journal of epidemiology, 1(1), pp.5-10.

Akhaddar, A., Gazzaz, M., Albouzidi, A., Lmimouni, B., Elmostarchid, B. and Boucetta, M., 2008. Invasive *Aspergillus terreus* sinusitis with orbitocranial extension: case report. *Surgical neurology*, 69(5), pp.490-495.

Alanio, A., Romand, S., Penso-Assathiany, D., Foulet, F. and Botterel, F., 2011. *Microsporum praecox*: molecular identification of a new case and review of the literature. *Mycopathologia*, 171, pp.61-65.

Albisetti, M., Lauener, R.P., Güngör, T., Schär, G., Niggli, F.K. and Nadal, D., 2004. Disseminated *Fusarium oxysporum* infection in hemophagocytic lymphohistiocytosis. *Infection*, 32(6), pp.364-366.

Alčiauskas, T., Zablockienė, B., Zablockis, R., Svetikas, L., Bilotaitė, L. and Jančorienė, L., 2022. Pulmonary Coccidioidomycosis: A Case Report and Literature Review. *Medicina*, 58(5), p.655.

Alegre-González, D., Herrera, S., Bernal, J., Soriano, A. and Bodro, M., 2021. Disseminated *Cryptococcus neoformans* infection associated to COVID-19. *Medical mycology case reports*, 34, pp.35-37.

Alex, D., Li, D., Calderone, R. and Peters, S.M., 2013. Identification of *Curvularia lunata* by polymerase chain reaction in a case of fungal endophthalmitis. *Medical mycology case reports*, 2, pp.137-140.

Al-Hatmi, A., Bonifaz, A., de Hoog, G.S., Vazquez-Maya, L., Garcia-Carmona, K., Meis, J.F. and van Diepeningen, A.D., 2014. Keratitis by *Fusarium temperatum*, a novel opportunist. *BMC infectious diseases*, 14(1), pp.1-9.

Al-Hatmi, A.M., Bonifaz, A., Tirado-Sánchez, A., Meis, J.F., de Hoog, G.S. and Ahmed, S.A., 2017. *Fusarium* species causing eumycetoma: report of two cases and comprehensive review of the literature. *Mycoses*, 60(3), pp.204-212.

Aljuboori, Z., Hruska, R., Yaseen, A., Arnold, F., Wojda, B. and Nauta, H., 2017. Fungal brain abscess caused by “Black Mold”(Cladophialophora bantiana)—a case report of successful treatment with an emphasis on how fungal brain abscess may be different from bacterial brain abscess. *Surgical Neurology International*, 8.

Allaw, F., Kara Zahreddine, N., Ibrahim, A., Tannous, J., Taleb, H., Bizri, A.R., Dbaiibo, G. and Kanj, S.S., 2021. First *Candida auris* outbreak during a COVID-19 pandemic in a tertiary-care center in Lebanon. *Pathogens*, 10(2), p.157.

Al-Obaid, I., Ahmad, S., Khan, Z.U., Dinesh, B. and Hejab, H.M., 2006. Catheter-associated fungemia due to *Exophiala oligosperma* in a leukemic child and review of fungemia cases caused by *Exophiala* species. *European Journal of Clinical Microbiology and Infectious Diseases*, 25, pp.729-732.

Al-Rashdi A, Al-Maani A, Al-Wahaibi A, Alqayoudhi A, Al-Jardani A, Al-Abri S. Characteristics, risk factors, and survival analysis of *Candida auris* cases: results of one-year national surveillance data from Oman. *Journal of Fungi*. 2021 Jan 7;7(1):31.

Alshaya, O.A., Saleh, R.A. and Alshehri, S.D., 2021. Voriconazole-Induced Hepatotoxicity Resolved after Switching to Amphotericin B in *Fusarium dimerum* Central Line-Associated Bloodstream Infection. *The American Journal of Case Reports*, 22, pp.e932544-1.

Al Otaibi, T.M., Gheith, O.A., Alobaid, K., Nair, P., Eldein, S.M.Z., Mahmoud, T.S., Halim, M.A., Aboatya, H.H., Balaha, M.A., Nagib, A.M. and Al-Hatmi, A.M., 2021. Disseminated *Rhinocladiella mackenziei* infection in a kidney transplant recipient: A case report and literature review. *Journal of Medical Mycology*, 31(4), p.101196.

Al-Sweih, N., Ahmad, S., Khan, S., Joseph, L., Asadzadeh, M. and Khan, Z., 2019. *Cyberlindnera fabianii* fungaemia outbreak in preterm neonates in Kuwait and literature review. *Mycoses*, 62(1), pp.51-61.

Al-Sweih, N., Ahmad, S., Joseph, L., Khan, S. and Khan, Z., 2014. *Malassezia pachydermatis* fungemia in a preterm neonate resistant to fluconazole and flucytosine. *Medical mycology case reports*, 5, pp.9-11.

Al-Tawfiq, J.A. and Boukhamseen, A., 2011. Cerebral phaeohyphomycosis due to *Rhinocladiella mackenziei* (formerly *Ramichloridium mackenziei*): case presentation and literature review. *Journal of Infection and Public Health*, 4(2), pp.96-102.

Alvarez, M., Lopez Ponga, B., Rayon, C., Garcia Gala, J., Roson Porto, M.C., Gonzalez, M., Martinez-Suarez, J.V. and Rodriguez-Tudela, J.L., 1995. Nosocomial outbreak caused by *Scedosporium prolificans* (inflatum): four fatal cases in leukemic patients. *Journal of clinical microbiology*, 33(12), pp.3290-3295.

Al-Zaydani, I.A., Al-Hakami, A.M., Joseph, M.R., Kassem, W.M., Almaghrabi, M.K., Nageeb, A. and Hamid, M.E., 2015. Aggressive cutaneous zygomycosis caused by *Apophysomyces variabilis* in an immunocompetent child. *Medical mycology case reports*, 10, pp.11-13.

Amazan, E., Desbois, N., Fidelin, G., Baubion, E., Derancourt, C., Thimon, S., Ekindi, N. and Quist, D., 2014. First case of phaeohyphomycosis due to *Pleurostoma ootheca* in a kidney transplant recipient in Martinique (French West Indies). *Médecine et Santé Tropicales*, 24(3), pp.323-325.

Amona, F.M., Denning, D.W., Moukassa, D., Develoux, M. and Hennequin, C., 2021. Histoplasmosis in the Republic of Congo dominated by African histoplasmosis, *Histoplasma capsulatum* var. *duboisii*. *PLoS Neglected Tropical Diseases*, 15(5), p.e0009318.

Anadolu, R., Hilmioğlu, S., Oskay, T., E Boyvat, A., Peksari, Y. and Gürgey, E., 2001. Indolent *Acremonium strictum* infection in an immunocompetent patient. *International journal of dermatology*, 40(7), pp.451-453.

Anand, M., Deshmukh, S.D., Pande, D.P., Naik, S. and Ghadage, D.P., 2010. Subcutaneous zygomycosis due to *Basidiobolus ranarum*: a case report from Maharashtra, India. *Journal of Tropical Medicine*, 2010.

Anane, S., Chtourou, O., Bodemer, C. and Kharfi, M., 2013. *Malassezia* folliculitis in an infant. *Medical mycology case reports*, 2, pp.72-74.

Andersen, A.J.B., Fuchs, C., Ardigo, M., Haedersdal, M. and Mogensen, M., 2018. In vivo characterization of pustules in *Malassezia* Folliculitis by reflectance confocal microscopy and optical coherence tomography. A case series study. *Skin Research and Technology*, 24(4), pp.535-541.

Anita, K., Fernandez, N. and Rao, R., 2010. Fungal endophthalmitis caused by *Paecilomyces variotii*, in an immunocompetent patient, following intraocular lens implantation. *Indian Journal of Medical Microbiology*, 28(3), p.253.

Ankad, B.S., Manjula, R., Tejasvi, T. and Nikam, B.P., 2019. Dermoscopy of eumycotic mycetoma: A case report. *Dermatology Practical & Conceptual*, 9(4), p.297.

Appenzeller, S., Amaral, T.N., Amstalden, E.M.I., Bertolo, M.B., Neto, J.F.M., Samara, A.M. and Fernandes, S.R.M., 2006. *Sporothrix schenckii* infection presented as monoarthritis: report of two cases and review of the literature. *Clinical rheumatology*, 25, pp.926-928.

Ara, M., Aspiroz, C., Zaballos, P., Alcalde, V., Alvarez, R., Rezusta, A. and Giménez, J.A., 2006. Relapse of cutaneous *Alternaria* infectoria in a renal transplant recipient after 2 years. *Acta dermato-venereologica*, 86(2), pp.154-155.

Araújo, M.J.C.L.N., Nihei, C.H., Rodrigues, A.M., Higashino, H., Ponzio, V., Pignatari, A.C.C., Barcellos, M.A., Braga, O. and Duayer, I.F., 2021. Case report: Invasive sinusitis due to *Sporothrix brasiliensis* in a renal transplant recipient. *The American Journal of Tropical Medicine and Hygiene*, 105(5), p.1218.

Arias, F., Mata-Essayag, S., Landaeta, M.E., de Capriles, C.H., Pérez, C., Núñez, M.J., Carvajal, A. and Silva, M., 2004. *Candida albicans* osteomyelitis: case report and literature review. *International journal of infectious diseases*, 8(5), pp.307-314.

Aribandi, M., Bazan Iii, C. and Rinaldi, M.G., 2005. Magnetic resonance imaging findings in fatal primary cerebral infection due to *Chaetomium strumarium*. *Australasian Radiology*, 49(2), pp.166-169.

Arroyo, M.A., Schmitt, B.H., Davis, T.E. and Relich, R.F., 2016. Detection of the dimorphic phases of *Mucor circinelloides* in blood cultures from an immunosuppressed female. *Case Reports in Infectious Diseases*, 2016.

- Arunkumar, M.J., Rajshekhar, V., Chandy, M.J., Thomas, P.P. and Jacob, C.K., 2000. Management and outcome of brain abscess in renal transplant recipients. *Postgraduate medical journal*, 76(894), pp.207-211.
- Atalay, A., Koc, A.N., Akyol, G., Cakir, N., Kaynar, L. and Ulu-Kilic, A., 2016. Pulmonary infection caused by *Talaromyces purpurogenus* in a patient with multiple myeloma. *Infez Med*, 24(2), pp.153-7.
- Aspiroz, C., Gené, J., Rezusta, A., Charlez, L. and Summerbell, R.C., 2007. First Spanish case of onychomycosis caused by *Chaetomium globosum*. *Sabouraudia*, 45(3), pp.279-282.
- Austen, B., McCarthy, H., Wilkins, B., Smith, A. and Duncombe, A., 2001. Fatal disseminated fusarium infection in acute lymphoblastic leukaemia in complete remission. *Journal of clinical pathology*, 54(6), pp.488-490.
- Baby, S., Ramya, T.G. and Geetha, R.K., 2015. Onychomycosis by *Syncephalastrum racemosum*: case report from Kerala, India. *Dermatology Reports*, 7(1).
- Baghdadi, J., Hemarajata, P., Humphries, R. and Kelesidis, T., 2015. First report of ventriculoperitoneal shunt infection due to *Cyberlindnera fabianii*. *Case Reports in Infectious Diseases*, 2015.
- Badali, H., Fernández-González, M., Mousavi, B., Illnait-Zaragozi, M.T., González-Rodríguez, J.C., de Hoog, G.S. and Meis, J.F., 2013. Chromoblastomycosis due to *Fonsecaea pedrosoi* and *F. monophora* in Cuba. *Mycopathologia*, 175, pp.439-444.
- Ballestas, S.A., Magliocca, K.R., Balter, L. and Hatcher, J.L., 2020. Laryngeal blastomycosis, an unexpected diagnosis: a case report. *Journal of Voice*.
- Balne, P.K., Nalamada, S., Kodiganti, M. and Taneja, M., 2012. Fungal keratitis caused by *Chaetomium atrobrunneum*. *Cornea*, 31(1), pp.94-95.
- Banerjee, U., Gupta, K. and Venugopal, P., 1997. A case of prosthetic valve endocarditis caused by *Cryptococcus neoformans* var. *neoformans*. *Journal of medical and veterinary mycology*, 35(2), pp.139-141.
- Baradkar, V.P. and Kumar, S., 2009. Cutaneous zygomycosis due to *Saksenaea vasiformis* in an immunocompetent host. *Indian journal of dermatology*, 54(4), p.382.
- Barba-Gómez, J.F., Mayorga, J., McGinnis, M.R. and González-Mendoza, A., 1992. Chromoblastomycosis caused by *Exophiala spinifera*. *Journal of the American Academy of Dermatology*, 26(2), pp.367-370.
- Barocas, J.A. and Gauthier, G.M., 2014. Peritonitis caused by *Blastomyces dermatitidis* in a kidney transplant recipient: case report and literature review. *Transplant Infectious Disease*, 16(4), pp.634-641.
- Barantsevich, N.E., Orlova, O.E., Shlyakhto, E.V., Johnson, E.M., Woodford, N., Lass-Floerl, C., Churkina, I.V., Mitrokhin, S.D., Shkoda, A.S. and Barantsevich, E.P., 2019. Emergence of *Candida auris* in Russia. *Journal of Hospital Infection*, 102(4), pp.445-448.
- Barber, G.R., Brown, A.E., Kiehn, T.E., Edwards, F.F. and Armstrong, D., 1993. Catheter-related *Malassezia furfur* fungemia in immunocompromised patients. *The American journal of medicine*, 95(4), pp.365-370.
- Bard, J.D., Mangahis, A., Hofstra, T.C. and Bender, J.M., 2014. First case report of bloodstream infection by *Rhizomucor pusillus* in a child with hemophagocytic lymphohistiocytosis. *Medical mycology case reports*, 5, pp.20-23.
- Barrs, V.R., van Doorn, T.M., Houbraken, J., Kidd, S.E., Martin, P., Pinheiro, M.D., Richardson, M., Varga, J. and Samson, R.A., 2013. *Aspergillus felis* sp. nov., an emerging agent of invasive aspergillosis in humans, cats, and dogs. *PLoS One*, 8(6), p.e64871.
- Bartash, R., Guo, Y., Pope, J.B., Levi, M.H., Szymczak, W., Saraiya, N. and Nori, P., 2017. Periprosthetic hip joint infection with *Aspergillus terreus*: a clinical case and a review of the literature. *Medical mycology case reports*, 18, pp.24-27.
- Batra, N., Kaur, H., Mohindra, S., Singh, S., Shamanth, A.S. and Rudramurthy, S.M., 2019. *Cladosporium sphaerospermum* causing brain abscess, a saprophyte turning pathogen: Case and review of published reports. *Journal de Mycologie Médicale*, 29(2), pp.180-184.

Bay, C., Gonzalez, T., Munoz, G., Legarraga, P., Vizcaya, C. and Abarca, K., 2017. Nasal phaeohyphomycosis by *Curvularia spicifera* in pediatric patient with neutropenia and acute myeloid leukemia. *Revista Chilena de Infectologia: Organo Oficial de la Sociedad Chilena de Infectologia*, 34(3), pp.280-286.

Behera, B., Singh, R.I., Xess, I., Mathur, P., Hasan, F. and Misra, M.C., 2010. *Candida rugosa*: a possible emerging cause of candidaemia in trauma patients. *Infection*, 38(5), pp.387-393.

Bellanda, V.F. and See, C.W., 2023. *Coniochaeta mutabilis* keratitis with an unusual mode of transmission treated with penetrating keratoplasty and systemic antifungals. *American Journal of Ophthalmology Case Reports*, 32, p.101930.

Benelli, J.L., Basso, R.P., Grafulha, T.W., Poester, V.R., Munhoz, L.S., Martins, K.B., Zogbi, H.E., Von Groll, A., Severo, C.B., Stevens, D.A. and Xavier, M.O., 2022. Fungal bloodstream co-infection by *Trichosporon asahii* in a COVID-19 critical patient: case report and literature review. *Mycopathologia*, 187(4), pp.397-404.

Berbel, R.F., Casella, A.M.B., de Freitas, D. and Höfling-Lima, A.L., 2011. *Curvularia lunata* endophthalmitis. *Journal of ocular pharmacology and therapeutics*, 27(5), pp.535-537.

Berejnoi, A., Taverna, C.G., Mazza, M., Vivot, M., Isla, G., Córdoba, S. and Davel, G., 2019. First case report of cryptococcosis due to *Cryptococcus decagattii* in a pediatric patient in Argentina. *Revista da Sociedade Brasileira de Medicina Tropical*, 52.

Beresford, R., Dolot, V. and Foo, H., 2019. Cranial aspergillosis in a patient receiving ibrutinib for chronic lymphocytic leukemia. *Medical mycology case reports*, 24, pp.27-29.

Berg, D., Garcia, J.A., Schell, W.A., Perfect, J.R. and Murray, J.C., 1995. Cutaneous infection caused by *Curvularia pallescens*: a case report and review of the spectrum of disease. *Journal of the American Academy of Dermatology*, 32(2), pp.375-378.

Berg, J.C., Hamacher, K.L. and Roberts, G.D., 2007. Pseudomycetoma caused by *Microsporum canis* in an immunosuppressed patient: a case report and review of the literature. *Journal of cutaneous pathology*, 34(5), pp.431-434.

Bertumen, J.B., Schell, W.A., Joyce, M., Alley, C. and Woods, C.W., 2016. Diagnostic difficulty identifying *Apophysomyces trapeziformis* septic arthritis in a patient with multiple myeloma. *JMM case reports*, 3(6).

Bibashi, E., Sidi, V., Kotsiou, M., Makrigiannaki, E. and Kolioukas, D., 2008. Pulmonary zygomycosis caused by *Cunninghamella bertholletiae* in a child with acute lymphoblastic leukemia. *Hippokratia*, 12(1), p.43.

Bibashi, E., de Hoog, G.S., Pavlidis, T.E., Symeonidis, N., Sakantamis, A. and Walther, G., 2013. Wound infection caused by *Lichtheimia ramosa* due to a car accident. *Medical mycology case reports*, 2, pp.7-10.

Bigley, V.H., Duarte, R.F., Gosling, R.D., Kibbler, C.C., Seaton, S. and Potter, M., 2004. *Fusarium dimerum* infection in a stem cell transplant recipient treated successfully with voriconazole. *Bone marrow transplantation*, 34(9), pp.815-817.

Bonifaz, A., Badali, H., De Hoog, G.S., Cruz, M., Araiza, J., Cruz, M.A., Fierro, L. and Ponce, R., 2008. Tinea nigra by *Hortaea werneckii*, a report of 22 cases from Mexico. *Studies in Mycology*, 61, pp.77-82.

Boukassa, L., Ngackosso, O.B., Kinata Bambino, S.B., Ekouele Mbaki, H.B., Ngounda Monianga, S.A., Mavoungou Biatsi, K. and Pecko, J.F., 2019. Cranial and Spinal Locations of *Histoplasma capsulatum* var. *duboisii* in Brazzaville, Congo. *Iranian Journal of Neurosurgery*, 5(2), pp.63-69.

Badali, H., Carvalho, V.O., Vicente, V., Attili-Angelis, D., Kwiatkowski, I.B., Van Den Ende, A.G. and De Hoog, G.S., 2009. *Cladophialophora saturnica* sp. nov., a new opportunistic species of Chaetothyriales revealed using molecular data. *Medical Mycology*, 47(1), pp.51-66.

Baddley, J.W., Moser, S.A., Sutton, D.A. and Pappas, P.G., 2000. *Microascus cinereus* (anamorph *Scopulariopsis*) brain abscess in a bone marrow transplant recipient. *Journal of Clinical Microbiology*, 38(1), pp.395-397.



Balne, P.K., Nalamada, S., Kodiganti, M. and Taneja, M., 2012. Fungal keratitis caused by *Chaetomium atrobrunneum*. *Cornea*, 31(1), pp.94-95.

Barbaryan, A., El Atrouni, W., Bailuc, S., Jones, M.W., Bhakta, M., Mahmoud, K.H. and Mirrakhimov, A.E., 2018. Isolated *Sporothrix schenckii* monoarthritis. *Case Reports in Infectious Diseases*, 2018.

Barron, M.A., Sutton, D.A., Veve, R., Guarro, J., Rinaldi, M., Thompson, E., Cagnoni, P.J., Moultney, K. and Madinger, N.E., 2003. Invasive mycotic infections caused by *Chaetomium perlucidum*, a new agent of cerebral phaeohyphomycosis. *Journal of clinical microbiology*, 41(11), pp.5302-5307.

Bellanger, A.P., Cervoni, J.P., Faucher, J.F., Weil-Verhoeven, D., Ginot, M., Deconinck, E. and Grenouillet, F., 2017. *Paecilomyces variotii* fungemia in a patient with lymphoma needing liver transplant. *Mycopathologia*, 182(7), pp.761-765.

Benítez, I., Rodríguez, M., Lezcano, V., Morel, Z., Pereira, J., Brizuela, S. and Galleano, H., 2019. Disseminated histoplasmosis with skin lesions and osteomyelitis in a child with acute lymphoblastic leukemia undergoing maintenance treatment. *Pediatría (Asunción)*, 46(1), pp.38-42.

Bernacer, M., Gadea, I., Esteban, J., Gegundez, M.I., Kamal, K. and Soriano, F., 1992. Catheter-related fungemia due to *Paecilomyces lilacinus* in a leukemic child. *Med Microbiol Lett*, 1, pp.207-212.

Bhaskaran, A., Obeid, K.M., Arbefeville, S. and Ferrieri, P., 2016. *Trichosporon loubieri* fungemia in a 39-year-old Caucasian woman with B-cell lymphoblastic leukemia. *Laboratory medicine*, 47(3), pp.255-258.

Bhat, S.V., Paterson, D.L., Rinaldi, M.G. and Veldkamp, P.J., 2007. *Scedosporium prolificans* brain abscess in a patient with chronic granulomatous disease: successful combination therapy with voriconazole and terbinafine. *Scandinavian journal of infectious diseases*, 39(1), pp.87-90.

Bibashi, E., de Hoog, G.S., Pavlidis, T.E., Symeonidis, N., Sakantamis, A. and Walther, G., 2013. Wound infection caused by *Lichtheimia ramosa* due to a car accident. *Medical mycology case reports*, 2, pp.7-10.

Bigley, V.H., Duarte, R.F., Gosling, R.D., Kibbler, C.C., Seaton, S. and Potter, M., 2004. *Fusarium dimerum* infection in a stem cell transplant recipient treated successfully with voriconazole. *Bone marrow transplantation*, 34(9), pp.815-817.

Blazquez, D., Ruiz-Contreras, J., Fernández-Cooke, E., González-Granado, I., Delgado, M.D., Menendez, M.T., Rodriguez-Gil, Y., Ballen, A. and Del Palacio, A., 2010. *Lichtheimia corymbifera* subcutaneous infection successfully treated with amphotericin B, early debridement, and vacuum-assisted closure. *Journal of pediatric surgery*, 45(12), pp.e13-e15.

Boan, P., Pang, S., Mowlaboccus, S., Wrobel, J.P., Musk, M., Lavender, M., Yaw, M.C., Hernest, A., MacQuillan, G., Dembo, L.G. and Coombs, G.W., 2022. *Apophysomyces Variabilis* Infection in Transplant Recipients due to Unrecognized Infection in an Intravenous Drug–Using Donor. *Transplantation*, 106(2), pp.e169-e171.

Bodey, G.P., Mardani, M., Hanna, H.A., Boktour, M., Abbas, J., Girgawy, E., Hachem, R.Y., Kontoyiannis, D.P. and Raad, I.I., 2002. The epidemiology of *Candida glabrata* and *Candida albicans* fungemia in immunocompromised patients with cancer. *The American journal of medicine*, 112(5), pp.380-385.

Bojic, M., Willinger, B., Rath, T., Tobudic, S., Thalhammer, F., Böhm, A., Mitterbauer, M., Schulenburg, A., Wöhrer, S., Kalhs, P. and Rabitsch, W., 2013. Fatal skin and pulmonary infection caused by *Ormoglyphiella aspergillata* in a leukaemic patient: case report and literature overview. *Mycoses*, 56(6), pp.687-689.

Bonatti, H., Lass-Flörl, C., Zelger, B., Lottersberger, C., Singh, N., Pruett, T.L., Margreiter, R. and Schneeberger, S., 2007. *Alternaria alternata* soft tissue infection in a forearm transplant recipient. *Surgical infections*, 8(5), pp.539-544.

Bonifaz, A., Córdoba-García, B., Simancas-Llanos, T., Hernández, M.A., Martínez-Herrera, E. and Tirado-Sánchez, A., 2019. Dermatophytosis caused by *Nannizzia nana* in two siblings. *Revista Iberoamericana de Micología*, 36(1), pp.30-33.

Borkar, S.A., Sharma, M.S., Rajpal, G., Jain, M., Xess, I. and Sharma, B.S., 2008. Brain abscess caused by *Cladophialophora bantiana* in an immunocompetent host: need for a novel cost-effective antifungal agent.

- Botterel, F., Romand, S., Cornet, M., Recanati, G., Dupont, B. and Bourée, P., 2001. Dermatophyte pseudomycetoma of the scalp: case report and review. *British Journal of Dermatology*, 145(1), pp.151-153.
- Borman, A.M., Szekely, A., Fraser, M., Lovegrove, S. and Johnson, E.M., 2019. A novel dermatophyte relative, *Nannizzia perplicata* sp. nov., isolated from a case of tinea corporis in the United Kingdom. *Medical Mycology*, 57(5), pp.548-556.
- Bougrine, A., Villeneuve-Tang, C., Bouffard, D., Rouleau, D. and Chartier, S., 2014. Kerion of the vulva caused by *Trichophyton mentagrophytes*. *Journal of Cutaneous Medicine and Surgery*, 18(3), pp.206-209.
- Bracca, A., Tosello, M.E., Girardini, J.E., Amigot, S.L., Gomez, C. and Serra, E., 2003. Molecular detection of *Histoplasma capsulatum* var. *capsulatum* in human clinical samples. *Journal of Clinical Microbiology*, 41(4), pp.1753-1755.
- Brasch, J., Busch, J.O. and de Hoog, G.S., 2008. Cutaneous phaeohyphomycosis caused by *Alternaria infectoria*. *Acta dermato-venereologica*, 88(2), pp.160-161.
- Brasch, J., Beck-Jendroschek, V., Iturrieta-González, I., Voss, K. and Gené, J., 2019. A human subcutaneous infection by *Microascus ennothomasiorum* sp. nov. *Mycoses*, 62(2), pp.157-164.
- Brasch, J., Dressel, S., Müller-Wening, K., Hügel, R., von Bremen, D. and De Hoog, G.S., 2011. Toenail infection by *Cladophialophora boppii*. *Medical Mycology*, 49(2), pp.190-193.
- Brilhante, R.S., Fechine, M.A., Mesquita, J.R., Cordeiro, R.A., Rocha, M.F., Monteiro, A.J., Lima, R.A., Caetano, É.P., Pereira, J.F., Castelo-Branco, D.S. and Camargo, Z.P., 2012. Histoplasmosis in HIV-positive patients in Ceará, Brazil: clinical-laboratory aspects and in vitro antifungal susceptibility of *Histoplasma capsulatum* isolates. *Transactions of the Royal Society of Tropical Medicine and Hygiene*, 106(8), pp.484-488.
- Brito, L.R., Guimarães, T., Nucci, M., Rosas, R.C., Paula Almeida, L., Da Matta, D.A. and Colombo, A.L., 2006. Clinical and microbiological aspects of candidemia due to *Candida parapsilosis* in Brazilian tertiary care hospitals. *Medical Mycology*, 44(3), pp.261-266.
- Brandt, M.E., Harrison, L.H., Pass, M., Sofair, A.N., Huie, S., Li, R.K., Morrison, C.J., Warnock, D.W. and Hajjeh, R.A., 2000. *Candida dubliniensis* fungemia: the first four cases in North America. *Emerging infectious diseases*, 6(1), p.46.
- Brischetto, A., Kidd, S. and Baird, R., 2015. Case Report: First Reported Australian Case of *Cladophilophora arxii*: Features Consistent with Possible Primary Pulmonary Chromoblastomycosis. *The American journal of tropical medicine and hygiene*, 92(4), p.791.
- Brown, D.A., Whealy, M.A., Van Gompel, J.J., Williams, L.N. and Klaas, J.P., 2015. Diagnostic dilemma in primary *Blastomyces dermatitidis* meningitis: role of neurosurgical biopsy. *Case Reports in Neurology*, 7(1), pp.63-70.
- Burnik, C., Altıntaş, N.D., Özkaya, G., Serter, T., Selcuk, Z.T., Firat, P., Arıkan, S., Cuenca-Estrella, M. and Topeli, A.R.Z.U., 2007. Acute respiratory distress syndrome due to *Cryptococcus albidus* pneumonia: case report and review of the literature. *Medical mycology*, 45(5), pp.469-473.
- Buchta, V., Feuermannová, A., Váša, M., Bašková, L., Kutová, R., Kubátová, A. and Vejsová, M., 2014. Outbreak of fungal endophthalmitis due to *Fusarium oxysporum* following cataract surgery. *Mycopathologia*, 177(1), pp.115-121.
- Buchta, V., Nekolová, J., Jirásková, N., Bolehovská, R., Wipler, J. and Hubka, V., 2019. Fungal keratitis caused by *Colletotrichum dematium*: case study and review. *Mycopathologia*, 184, pp.441-453.
- Bukhari, E. and Alrabiaah, A., 2009. First case of extensive spinal cord infection with *Aspergillus nidulans* in a child with chronic granulomatous disease. *The Journal of Infection in Developing Countries*, 3(04), pp.321-323.

Cai, Q., Lv, G.X., Jiang, Y.Q., Mei, H., Hu, S.Q., Xu, H.B., Wu, X.F., Shen, Y.N. and Liu, W.D., 2013. The first case of phaeohyphomycosis caused by *Rhinoctadiella basitona* in an immunocompetent child in China. *Mycopathologia*, 176(1-2), pp.101-105.

Calvo, B., Melo, A.S., Perozo-Mena, A., Hernandez, M., Francisco, E.C., Hagen, F., Meis, J.F. and Colombo, A.L., 2016. First report of *Candida auris* in America: clinical and microbiological aspects of 18 episodes of candidemia. *Journal of Infection*, 73(4), pp.369-374.

Camargo, J.F., Jabr, R.E., Anderson, A.D., Lekakis, L., Diaz-Paez, M., Briski, L.M., Raja, M., Morris, M.I., Komanduri, K.V. and Pereira, D., 2022. Successful treatment of disseminated disease due to highly resistant *Aspergillus calidoustus* with a novel antifungal therapy. *Antimicrobial agents and chemotherapy*, 66(3), pp.e02206-21.

Campos, A.G.M., de Hollanda, L.E., Oliveira, L.M., do Valle, F.F. and do Valle, V.A.F., 2018. Squamous cell carcinoma arising from a chromomycosis lesion caused by *Rhinoctadiella aquaspersa* with postsurgical recurrence of chromomycosis. *JAAD Case Reports*, 4(9), pp.915-917.

Campos-Herrero, M.I., Bordes, A., Perera, A., Ruiz, M.C. and Fernandez, A., 1996. *Trichoderma koningii* peritonitis in a patient undergoing peritoneal dialysis. *Clinical Microbiology Newsletter*, 18(19), pp.150-152.

Campos-Macías, P., Arenas-Guzmán, R. and Hernández-Hernández, F., 2013. *Fusarium subglutinans*: a new eumycetoma agent. *Medical mycology case reports*, 2, pp.128-131.

Cantón, E., Pemán, J., Quindós, G., Eraso, E., Miranda-Zapico, I., Álvarez, M., Merino, P., Campos-Herrero, I., Marco, F., de la Pedrosa, E.G.G. and Yagüe, G., 2011. Prospective multicenter study of the epidemiology, molecular identification, and antifungal susceptibility of *Candida parapsilosis*, *Candida orthopsilosis*, and *Candida metapsilosis* isolated from patients with candidemia. *Antimicrobial agents and chemotherapy*, 55(12), pp.5590-5596.

Capoor, M.R., Agarwal, P., Goel, M., Jain, S., Shivaprakash, M.R., Honnavar, P., Gupta, S. and Chakrabarti, A., 2016. Invasive pulmonary mycosis due to *Chaetomium globosum* with false-positive galactomannan test: a case report and literature review. *Mycoses*, 59(3), pp.186-193.

Caraway, N.P., Fanning, C.V., Stewart, J.M., Tarrand, J.J. and Weber, K.L., 2003. Coccidioidomycosis osteomyelitis masquerading as a bone tumor. A report of 2 cases. *Acta cytologica*, 47(5), pp.777-782.

Carey, J., D'Amico, R., Sutton, D.A. and Rinaldi, M.G., 2003. *Paecilomyces lilacinus* vaginitis in an immunocompetent patient. *Emerging Infectious Diseases*, 9(9), p.1155.

Carter, E. and Boudreaux, C., 2004. Fatal cerebral phaeohyphomycosis due to *Curvularia lunata* in an immunocompetent patient. *Journal of Clinical Microbiology*, 42(11), pp.5419-5423.

Carvalho, V.O., Vicente, V.A., Werner, B., Gomes, R.R., Fornari, G., Herkert, P.F., Rodrigues, C.O., Abagge, K.T., Robl, R. and Camiña, R.H., 2014. Onychomycosis by *Fusarium oxysporum* probably acquired in utero. *Medical mycology case reports*, 6, pp.58-61.

Castiglioni, B., Sutton, D.A., Rinaldi, M.G., Fung, J. and Kusne, S., 2002. *Pseudallescheria boydii* (anamorph *Scedosporium apiospermum*) infection in solid organ transplant recipients in a tertiary medical center and review of the literature. *Medicine*, 81(5), pp.333-348.

Castro, L.Á., Álvarez, M.I. and Martínez, E., 2010. Case report of *Schizophyllum commune* sinusitis in an immunocompetent patient. *Colombia Médica*, 41(1), pp.71-75.

Castro-Echeverry, E., Fiala, K. and Fernandez, M.P., 2017. Dermatophytic pseudomycetoma of the scalp. *The American Journal of dermatopathology*, 39(2), pp.e23-e25.

Cavanna, C., Seminari, E., Pusateri, A., Mangione, F., Lallitto, F., Esposto, M.C. and Pagella, F., 2014. Allergic fungal rhinosinusitis due to *Curvularia lunata*. *The new Microbiologica*, 37(2), pp.241-245.

Cavanna, C., Pagella, F., Esposto, M.C., Tamarozzi, F., Clemente, L., Marone, P., Matti, E. and Lallitto, F., 2019. Human infections due to *Schizophyllum commune*: case report and review of the literature. *Journal de Mycologie Médicale*, 29(4), pp.365-371.

Cetner, A., Krunic, A., Tesic, V. and Janda, W., 2009. Tinea capitis due to *Trichophyton soudanense* in Chicago, Illinois: report of a case. *Pediatric dermatology*, 26(2), pp.226-228.

Cawcutt, K., De Moraes, A.G., Lee, S.J., Park, J.G., Schears, G.J. and Nemergut, M.E., 2014. The use of ECMO in HIV/AIDS with *Pneumocystis jirovecii* Pneumonia: a case report and review of the literature. *Asaio Journal*, 60(5), pp.606-608.

Chander, J., Singla, N., Kaur, M., Punia, R.S., Attri, A., Alastruey-Izquierdo, A., Cano-Lira, J.F., Stchigel, A.M. and Guarro, J., 2017. *Saksenaea erythrospora*, an emerging mucoralean fungus causing severe necrotizing skin and soft tissue infections—a study from a tertiary care hospital in north India. *Infectious Diseases*, 49(3), pp.170-177.

Chakrabarti, A., Marak, R.S.K., Singhi, S., Gupta, S., Hurst, S.F. and Padhye, A.A., 2006. Brain abscess due to *Aspergillus nidulans*. *Journal de Mycologie Médicale*, 16(2), pp.100-104.

Chhabra, V., Rastogi, S., Barua, M. and Kumar, S., 2013. *Alternaria alternata* infection associated osteomyelitis of maxilla: A rare disease entity. *Indian Journal of Dental Research*, 24(5), p.639.

Chai, F.C., Auret, K., Christiansen, K., Yuen, P.W. and Gardam, D., 2000. Malignant otitis externa caused by *Malassezia sympodialis*. *Head & Neck: Journal for the Sciences and Specialties of the Head and Neck*, 22(1), pp.87-89.

Chakrabarti, A., Kumar, P., Padhye, A.A., Chatha, L., Singh, S.K., Das, A., Wig, J.D. and Kataria, R.N., 1997. Primary cutaneous zygomycosis due to *Saksenaea vasiformis* and *Apophysomyces elegans*. *Clinical infectious diseases*, 24(4), pp.580-582.

Chakrabarti, A., SHIVAPRAKASH, M.R., Singh, R., Tarai, B., George, V.K., Fomda, B.A. and Gupta, A., 2008. Fungal endophthalmitis: fourteen years' experience from a center in India. *Retina*, 28(10), pp.1400-1407.

Champa, H., Sreeshma, P., Prakash, P.Y. and Divya, M., 2013. Cutaneous infection with *Cylindrocarpon lichenicola*. *Medical mycology case reports*, 2, pp.55-58.

Chan, A.W., Cartwright, E.J., Reddy, S.C., Kraft, C.S. and Wang, Y.F., 2013. *Pichia anomala* (*Candida pelliculosa*) fungemia in a patient with sickle cell disease. *Mycopathologia*, 176(3), pp.273-277.

Chandra, S. and Woodgyer, A., 2002. Primary cutaneous zygomycosis due to *Mucor circinelloides*. *Australasian journal of dermatology*, 43(1), pp.39-42.

Chang, S.E., Lee, D.K., Choi, J.H., Moon, K.C. and Koh, J.K., 2005. Majocchi's granuloma of the vulva caused by *Trichophyton mentagrophytes*. *Mycoses*, 48(6), pp.382-384.

Chang, S.E., Kim, K.J., Lee, W.S., Choi, J.H., Sung, K.J., Moon, K.C. and Koh, J.K., 2003. A case of *Trichosporon cutaneum* folliculitis and septicaemia. *Clinical and experimental dermatology*, 28(1), pp.37-38.

Chauhan, A., Gruenberg, J., Arbefeville, S., Mettler, T., Brent, C.H. and Ferrieri, P., 2019. Disseminated *Hormographiella aspergillata* infection with lung and brain involvement after Allogenic hematopoietic stem-cell transplantation in a 54-year-old man. *Laboratory Medicine*, 50(4), pp.426-431.

Chaves, A.L.S., Trilles, L., Alves, G.M., Figueiredo-Carvalho, M.H.G., Brito-Santos, F., Coelho, R.A., Martins, I.S. and Almeida-Paes, R., 2021. A case-series of bloodstream infections caused by the *Meyerozyma guilliermondii* species complex at a reference center of oncology in Brazil. *Medical mycology*, 59(3), pp.235-243.

Chazan, B., Colodner, R., Polacheck, I., Shoufani, A., Rozenman, D. and Raz, R., 2004. Mycetoma of the foot caused by *Cylindrocarpon lichenicola* in an immunocompetent traveler. *Journal of travel medicine*, 11(5), pp.331-332.

Chen, Y.T., Yang, W.C., Chen, T.W. and Lin, C.C., 2013. *Trichosporon mucoides* peritonitis in a continuous ambulatory peritoneal dialysis patient. *Peritoneal Dialysis International*, 33(3), pp.341-342.

Chen, W., Seidl, H.P., Ring, J. and Schnopp, C., 2012. Two pediatric cases of *Microsporum persicolor* infection. *International Journal of Dermatology*, 51(2), pp.204-206.

Chen, J., He, T., Li, X., Wang, X., Peng, L. and Ma, L., 2020. Metagenomic next-generation sequencing in diagnosis of a case of *pneumocystis jirovecii* pneumonia in a kidney transplant recipient and literature review. *Infection and drug resistance*, pp.2829-2836.

Cheng, J., Zeng, D., Zhang, T., Zhang, L., Han, X., Zhou, P., Wang, L., He, J. and Han, Q., 2023. Microascus cirrosus SZ 2021: A potentially new genotype of Microascus cirrosus, which can cause fatal pulmonary infection in patients with acute leukemia following haplo-HSCT. *Experimental and Therapeutic Medicine*, 26(2), pp.1-12.

Chen, WT., Tu, ME. & Sun, PL. Superficial Phaeohyphomycosis Caused by *Aureobasidium melanogenum* Mimicking Tinea Nigra in an Immunocompetent Patient and Review of Published Reports. *Mycopathologia* **181**, 555–560 (2016). <https://doi.org/10.1007/s11046-016-9989-3>

Chew, K.L., Ng, D.H.L., Teo, J.W.P., Tan, K.B., Poon, L.M., Tambyah, P.A. and Ong, C.W.M., 2019. Disseminated *Volvarella volvacea* infections in patients with haematological malignancies: a case series. *Clinical Microbiology and Infection*, 25(1), pp.117-119.

Chi, C.C. and Wang, S.H., 2007. Disseminated cutaneous *Fusarium moniliforme* infections in a leukemic child. *International journal of dermatology*, 46(5), pp.487-489.

Chik, K.K. and To, W.K., 2020. Autochthonous *Emergomyces pasteurianus* pneumonia in an immunocompromised patient in Hong Kong: a case report. *Hong Kong Med J*, 26(5), pp.446-8.

Chim, C.S., Ho, P.L. and Yuen, K.Y., 1998. Simultaneous *Aspergillus fischeri* and Herpes simplex pneumonia in a patient with multiple myeloma. *Scandinavian journal of infectious diseases*, 30(2), pp.190-191.

Choe, Y.J., Blatt, D.B., Yalcindag, A., Geffert, S.F., Bobenchik, A.M. and Michelow, I.C., 2020. *Cryptococcus albidus* fungemia in an immunosuppressed child: case report and systematic literature review. *Journal of the Pediatric Infectious Diseases Society*, 9(1), pp.100-105.

Choi, H.I., An, J., Hwang, J.J., Moon, S.Y. and Son, J.S., 2017. Otomastoiditis caused by *Candida auris*: Case report and literature review. *Mycoses*, 60(8), pp.488-492.

Choudhury S and Marte RL. *Malassezia pachydermatis* fungaemia in an adult on posaconazole prophylaxis for acute myeloid leukaemia. *Pathology* 2014;46:466-7

Chowdhary, A., Randhawa, H.S., Singh, V., Khan, Z.U., Ahmad, S., Kathuria, S., Roy, P., Khanna, G. and Chandra, J., 2011. *Bipolaris hawaiiensis* as etiologic agent of allergic bronchopulmonary mycosis: first case in a paediatric patient. *Medical Mycology*, 49(7), pp.760-765.

Chowdhary, A., Randhawa, H.S., Khan, Z.U., Ahmad, S., Khanna, G., Gupta, R., Chakravarti, A. and Roy, P., 2010. Rhinoentomophthoromycosis due to *Conidiobolus coronatus*. A case report and an overview of the disease in India. *Sabouraudia*, 48(6), pp.870-879.

Chowdhary, A., Agarwal, K., Randhawa, H.S., Kathuria, S., Gaur, S.N., Najafzadeh, M.J., Roy, P., Arora, N., Khanna, G. and Meis, J.F., 2012. A rare case of allergic bronchopulmonary mycosis caused by *Alternaria alternata*. *Medical Mycology*, 50(8), pp.890-896.

Chowdhary, A., Randhawa, H.S., Gaur, S.N., Agarwal, K., Kathuria, S., Roy, P., Klaassen, C.H. and Meis, J.F., 2013. *Schizophyllum commune* as an emerging fungal pathogen: a review and report of two cases. *Mycoses*, 56(1), pp.1-10.

Chowdhary, A., Ahmad, S., Khan, Z.U., Doval, D.C. and Randhawa, H.S., 2004. *Trichosporon asahii* as an emerging etiologic agent of disseminated trichosporonosis: a case report and an update. *Indian Journal of Medical Microbiology*, 22(1), pp.16-22.

Chowfin, A., Tight, R. and Mitchell, S., 2000. Recurrent blastomycosis of the central nervous system: case report and review. *Clinical infectious diseases*, 30(6), pp.969-971.

Chow, J.K., Golan, Y., Ruthazer, R., Karchmer, A.W., Carmeli, Y., Lichtenberg, D., Chawla, V., Young, J. and Hadley, S., 2008. Factors associated with candidemia caused by non-albicans *Candida* species versus *Candida albicans* in the intensive care unit. *Clinical infectious diseases*, 46(8), pp.1206-1213.

Chu, C.M. and Lai, R.W., 2002. *Malassezia furfur* fungaemia in a ventilator-dependent patient without known risk factors. *Hong Kong Medical Journal*, 8(3), pp.212-215.

Civelek, R., Çakar, M.K., Yegin, Z.A., Erbaş, G., Tunçcan, Ö.G., Kalkancı, A. and Sucak, G.T., 2016. Acremonium Potronii Associated Pneumonia in an Allogeneic Stem Cell Transplantation Recipient. Gazi Medical Journal, 27(4).

Collado, C., Medina, L., Zorraquino, A., Baeza, T., Ferrer, C., Plazas, J. and Colom, M.F., 2013. Cutaneous fusariosis by a species of the Fusarium dimerum species complex in a patient with acute mieloblastic leukemia. Revista Iberoamericana de Micología, 30(2), pp.119-121.

Colombo, A., Maccari, G., Congiu, T., Basso, P., Baj, A. and Toniolo, A., 2013. Colonization of a central venous catheter by the hyaline fungus Fusarium solani species complex: a case report and SEM imaging. Case Reports in Medicine, 2013.

Coelho, D., Silva, S., Vale-Silva, L., Gomes, H., Pinto, E., Sarmiento, A. and Pinheiro, M.D., 2011. Aspergillus viridinutans: an agent of adult chronic invasive aspergillosis. Medical Mycology, 49(7), pp.755-759.

Coleman, H., Snell, L.B., Simons, R., Douthwaite, S.T. and Lee, M.J., 2020. COVID-19 and Pneumocystis jirovecii pneumonia: a diagnostic dilemma in HIV. AIDS (London, England).

Comacle, P., Le Govic, Y., Hoche-Delchet, C., Sandrini, J., Aguilar, C., Bouyer, B., Blanchi, S. and Penn, P., 2016. Spondylodiscitis due to Aspergillus terreus in an immunocompetent host: case report and literature review. Mycopathologia, 181(7), pp.575-581.

Concha, M., Nicklas, C., Balcells, E., Guzmán, A.M., Poggi, H., León, E. and Fich, F., 2012. The first case of tinea faciei caused by Trichophyton mentagrophytes var. erinacei isolated in Chile. International journal of dermatology, 51(3), pp.283-285.

Cooke, N.S., Feighery, C., Armstrong, D.K.B., Walsh, M. and Dempsey, S., 2009. Cutaneous Fusarium solani infection in childhood acute lymphoblastic leukaemia. Clinical and Experimental Dermatology: Clinical dermatology, 34(5), pp.e117-e119.

Correa-Martinez, C., Brentrup, A., Hess, K., Becker, K., Groll, A.H. and Schaumburg, F., 2018. First description of a local Coprinopsis cinerea skin and soft tissue infection. New Microbes and New Infections, 21, pp.102-104.

Crawford, S.J., Chen, S.A., Halliday, C., Rangan, G.K., Gottlieb, T. and Reid, A.B., 2015. Microsphaeropsis arundinis skin and soft tissue infection in renal transplant recipients: three case reports and a review of the literature. *Transplant Infectious Disease*, 17(6), pp.915-920.

Cunha, D., Amaro, C., Vieira, M.R., da Luz Martins, M., Maduro, A.P., Inácio, J., Afonso, A., Pinto, G.M. and Cardoso, J., 2012. Phaeohyphomycosis caused by Alternaria infectoria presenting as multiple vegetating lesions in a renal transplant patient. Revista Iberoamericana de Micología, 29(1), pp.44-46.

Da, Y., Vathsala, A. and Teo, R.Z.C., 2021. Invasive fungal infection by Volvariella volvacea: First reported case following solid organ transplantation and a unique therapeutic approach. Transplant Infectious Disease, 23(4), p.e13690.

Daboit, T.C., Magagnin, C.M., Heidrich, D., Castrillon, M.R., Mendes, S.D.C., Vettorato, G., Valente, P. and Scroferneker, M.L., 2013. A case of relapsed chromoblastomycosis due to Fonsecaea monophora: antifungal susceptibility and phylogenetic analysis. Mycopathologia, 176, pp.139-144.

Dalcin, D., Rothstein, A., Spinato, J., Escott, N. and Kus, J.V., 2016. Blastomyces gilchristii as cause of fatal acute respiratory distress syndrome. Emerging Infectious Diseases, 22(2), p.306.

Dananché, C., Cassier, P., Sautour, M., Gautheron, N., Wegrzyn, J., Perraud, M., Bienvenu, A.L., Nicolle, M.C., Boibieux, A. and Vanhems, P., 2015. Fungaemia caused by Fusarium proliferatum in a patient without definite immunodeficiency. Mycopathologia, 179(1), pp.135-140.

Davis, S.R., Ellis, D.H., Goldwater, P., Dimitriou, S. and Byard, R., 1994. First human culture-proven Australian case of entomophthoromycosis caused by *Basidiobolus ranarum*. *Journal of medical and veterinary mycology*, 32(3), pp.225-230.

Davis, C.M., Noroski, L.M., Dishop, M.K., Sutton, D.A., Braverman, R.M., Paul, M.E. and Rosenblatt, H.M., 2007. Basidiomycetous fungal *Inonotus tropicalis* sacral osteomyelitis in X-linked chronic granulomatous disease. *The Pediatric infectious disease journal*, 26(7), pp.655-656.

de Azevedo Bastos, V.R., de Castro Lima Santos, D.W., Padovan, A.C.B., Melo, A.S.A., de Abreu Mazzolin, M., Camargo, L.F.A. and Colombo, A.L., 2015. Early invasive pulmonary aspergillosis in a kidney transplant recipient caused by *Aspergillus lentulus*: first Brazilian report. *Mycopathologia*, 179, pp.299-305.

De Bernardis, F., Lorenzini, R., Verticchio, R., Agatensi, L. and Cassone, A., 1989. Isolation, acid proteinase secretion, and experimental pathogenicity of *Candida parapsilosis* from outpatients with vaginitis. *Journal of clinical microbiology*, 27(11), pp.2598-2603.

De Castro, N., Xu, F., Porcher, R., Pavie, J., Molina, J.M. and Peraldi, M.N., 2010. *Pneumocystis jirovecii* pneumonia in renal transplant recipients occurring after discontinuation of prophylaxis: a case-control study. *Clinical microbiology and infection*, 16(9), pp.1375-1377.

De Hoog, G.S., Mayser, P., Haase, G., Horré, R. and Horrevorts, A.M., 2000. A new species, *Phialophora europaea*, causing superficial infections in humans Eine neue Art, *Phialophora europaea*, als Erreger oberflächlicher Infektionen beim Menschen. *Mycoses*, 43(11-12), pp.409-416.

Degavre, B., Joujoux, J.M., Dandurand, M. and Guillot, B., 1997. First report of mycetoma caused by *Arthrographis kalrae*: successful treatment with itraconazole. *Journal of the American Academy of Dermatology*, 37(2), pp.318-320.

De Groote, M.A., Bjerke, R., Smith, H. and Rhodes III, L.V., 2000. Expanding epidemiology of blastomycosis: clinical features and investigation of 2 cases in Colorado. *Clinical infectious diseases*, 30(3), pp.582-584.

De Hoog, G.S., Buiting, A., Tan, C.S., Stroebel, A.B., Ketterings, C., De Boer, E.J., Naafs, B., Brimicombe, R., Nohlmans-Paulssen, M.K.E., Fabius, G.T.J. and Klokke, A.H., 1993.

De Macedo, P.M., Teixeira, M.D.M., Barker, B.M., Zancopé-Oliveira, R.M., Almeida-Paes, R. and Francesconi do Valle, A.C., 2019. Clinical features and genetic background of the sympatric species *Paracoccidioides brasiliensis* and *Paracoccidioides americana*. *PLoS neglected tropical diseases*, 13(4), p.e0007309.

De Miguel, D., Gómez, P., González, R., García-Suárez, J., Cuadros, J.A., Bañas, M.H., Romanyk, J. and Burgaleta, C., 2005. Nonfatal pulmonary *Trichoderma viride* infection in an adult patient with acute myeloid leukemia: report of one case and review of the literature. *Diagnostic microbiology and infectious disease*, 53(1), pp.33-37.

Desai, H.B., Perkins, P.L. and Procop, G.W., 2011. Granulomatous dermatitis due to *Malassezia sympodialis*. *Archives of Pathology & Laboratory Medicine*, 135(9), pp.1085-1087.

Diagnostic problems with imported cases of mycetoma in The Netherlands: Schwierigkeiten in der Diagnostik importierter Myzetome in den Niederlanden. *Mycoses*, 36(3-4), pp.81-87.

Didehdar, M., Gokanian, A., Sofian, M., Mohammadi, S., Mohammadi, R., Aslani, N., Haghani, I. and Badali, H., 2015. First fatal cerebral phaeohyphomycosis due to *Rhinocladiella mackenziei* in Iran, based on ITS rDNA. *Journal de mycologie medicale*, 25(1), pp.81-86.

de Andrade, T.S., de Almeida, A.M.Z., Basano, S.D.A., Takagi, E.H., Szeszs, M.W., Melhem, M.S., Albuquerque, M., Camargo, J.D.S.A.A., Gambale, W. and Camargo, L.M.A., 2020. Chromoblastomycosis in the Amazon region, Brazil, caused by *Fonsecaea pedrosoi*, *Fonsecaea nubica*, and *Rhinocladiella similis*: Clinicopathology, susceptibility, and molecular identification. *Medical mycology*, 58(2), pp.172-180.

Deak, L., Mudalagiriappa, S., Ballin, A., Saxton, D. and Chakrabarti, A., 2018. A rhinofacial *Conidiobolus coronatus* fungal infection presenting as an intranasal tumour. *Sultan Qaboos University Medical Journal*, 18(4), p.e549.



Demaria, R.G., Dürrleman, N., Rispail, P., Margueritte, G., Macia, J.C., Aymard, T., Frapier, J.M., Albat, B. and Chaptal, P.A., 2000. *Aspergillus flavus* mitral valve endocarditis after lung abscess. *The Journal of Heart Valve Disease*, 9(6), pp.786-790.

Deroche, L., Buyck, J., Cateau, E., Rammaert, B., Marchand, S. and Brunet, K., 2022. Draft Genome Sequence of *Kazachstania bovina* Yeast Isolated from Human Infection. *Mycopathologia*, 187(4), pp.413-415.

Desmet, S., Smets, L., Lagrou, K., Derdelinckx, I., Neyt, J., Maertens, J., Sciot, R., Demaerel, P. and Bammens, B., 2016. *Cladophialophora bantiana* osteomyelitis in a renal transplant patient. *Medical mycology case reports*, 12, pp.17-20.

de Azevedo, C.M., Gomes, R.R., Vicente, V.A., Santos, D.W., Marques, S.G., do Nascimento, M.M., Andrade, C.E., Silva, R.R., Queiroz-Telles, F. and de Hoog, G.S., 2015. *Fonsecaea pugnacius*, a novel agent of disseminated chromoblastomycosis. *Journal of clinical microbiology*, 53(8), pp.2674-2685.

de Freitas, R.S., de Freitas, T.H.P., Siqueira, L.P.M., Gimenes, V.M.F. and Benard, G., 2019. First report of tinea corporis caused by *Arthroderma benhamiae* in Brazil. *Brazilian Journal of Microbiology*, 50, pp.985-987.

de Macedo, P.M., Almeida-Paes, R., de Medeiros Muniz, M., Oliveira, M.M.E., Zancopé-Oliveira, R.M., Costa, R.L.B. and do Valle, A.C.F., 2016. *Paracoccidioides brasiliensis* PS2: first autochthonous paracoccidioidomycosis case report in Rio de Janeiro, Brazil, and literature review. *Mycopathologia*, 181, pp.701-708.

de Souza, M., Matsuzawa, T., Lyra, L., Busso-Lopes, A.F., Gonoï, T., Schreiber, A.Z., Kamei, K., Moretti, M.L. and Trabasso, P., 2014. *Fusarium napiforme* systemic infection: case report with molecular characterization and antifungal susceptibility tests. *Springerplus*, 3(1), pp.1-8.

Dhindsa, M.K., Naidu, J., Singh, S.M. and Jain, S.K., 1995. Chronic suppurative otitis media caused by *Paecilomyces variotii*. *Journal of medical and veterinary mycology*, 33(1), pp.59-61.

Ding, Y., Steed, L.L. and Batalis, N., 2020. First reported case of disseminated *Microascus gracilis* infection in a lung transplant patient. *IDCases*, 22, p.e00984.

Diongue, K., Diallo, M.A., Seck, M.C., Ndiaye, M., Badiane, A.S., Diop, A., Ndiaye, Y.D., Ndir, O. and Ndiaye, D., 2016. Tinea pedis due to *Cylindrocarpon lichenicola* beginning onycholysis. *Medical mycology case reports*, 11, pp.13-15.

Dizbay, M., Adisen, E., Kustimur, S., Sari, N., Cengiz, B., Yalcin, B., Kalkanci, A., Gonul, I.I. and Sugita, T., 2009. Fungemia and cutaneous zygomycosis due to *Mucor circinelloides* in an intensive care unit patient: case report and review of literature. *Jpn J Infect Dis*, 62(2), pp.146-148.

Do Carmo, A., Costa, E., Marques, M., Quadrado, M.J. and Tomé, R., 2016. *Fusarium dimerum* species complex (*Fusarium penzigii*) keratitis after corneal trauma. *Mycopathologia*, 181(11), pp.879-884.

Dogan, M., Pabuçcuoglu, U., Sarioglu, S. and Yücesoy, M., 2004. Isolated nasopharyngeal aspergillosis caused by *A. flavus* and associated with oxalosis. *Ear, nose & throat journal*, 83(5), pp.331-333.

Domniz, Y., Lawless, M., Sutton, G.L., Rogers, C.M. and Meagher, L.J., 2001. Successful treatment of *Paecilomyces lilacinus* endophthalmitis after foreign body trauma to the cornea. *Cornea*, 20(1), pp.109-111.

Dot, J.M., Debourgogne, A., Champigneulle, J., Salles, Y., Brizion, M., Puyhardy, J.M., Collomb, J., Plénat, F. and Machouart, M., 2009. Molecular diagnosis of disseminated adiaspiromycosis due to *Emmonsia crescens*. *Journal of clinical microbiology*, 47(4), pp.1269-1273.

Dotis, J., Panagopoulou, P., Filioti, J., Winn, R., Toptsis, C., Panteliadis, C. and Roilides, E., 2003. Femoral osteomyelitis due to *Aspergillus nidulans* in a patient with chronic granulomatous disease. *Infection*, 31(2), pp.121-124.

Doymaz, M.Z., Seyithanoglu, M.F., Hakyemez, İ., Gultepe, B.S., Cevik, S. and Aslan, T., 2015. A case of cerebral phaeohyphomycosis caused by *Fonsecaea monophora*, a neurotropic dematiaceous fungus, and a review of the literature. *Mycoses*, 58(3), pp.187-192.

Dubois, D., Pihet, M., Clec'h, C.L., Croué, A., Beguin, H., Bouchara, J.P. and Chabasse, D., 2005. Cutaneous phaeohyphomycosis due to *Alternaria infectoria*. *Mycopathologia*, 160, pp.117-123.

Dutra, V.R., Silva, L.F., Oliveira, A.N.M., Beirigo, E.F., Arthur, V.M., Bernardes da Silva, R., Ferreira, T.B., Andrade-Silva, L., Silva, M.V., Fonseca, F.M. and Silva-Vergara, M.L., 2020. Fatal case of fungemia by *Wickerhamomyces anomalus* in a pediatric patient diagnosed in a teaching hospital from Brazil. *Journal of Fungi*, 6(3), p.147.

Eaton, M.E., Padhye, A.A., Schwartz, D.A. and Steinberg, J.P., 1994. Osteomyelitis of the sternum caused by *Apophysomyces elegans*. *Journal of Clinical Microbiology*, 32(11), pp.2827-2828.

Ebeo, C.T., Olive, K., Byrd Jr, R.P., Mirle, G., Roy, T.M. and Mehta, J.B., 2002. Blastomycosis of the vocal folds with life-threatening upper airway obstruction: a case report. *Ear, nose & throat journal*, 81(12), pp.852-855.

Ebright, J.R., Chandrasekar, P.H., Marks, S., Fairfax, M.R., Aneziokoro, A. and McGinnis, M.R., 1999. Invasive sinusitis and cerebritis due to *Curvularia clavata* in an immunocompetent adult. *Clinical infectious diseases*, pp.687-689.

Echaiz, J.F., Burnham, C.A.D. and Bailey, T.C., 2013. A case of *Apophysomyces trapeziformis* necrotizing soft tissue infection. *International Journal of Infectious Diseases*, 17(12), pp.e1240-e1242.

Edupuganti, S., Roupheal, N., Mehta, A., Eaton, M., Heller, J.G., Bressler, A., Brandt, M. and O'Donnell, K., 2011. *Fusarium* *falciforme* vertebral abscess and osteomyelitis: case report and molecular classification. *Journal of clinical microbiology*, 49(6), pp.2350-2353.

Egli, A., Fuller, J., Humar, A., Lien, D., Weinkauff, J., Nador, R., Kapasi, A. and Kumar, D., 2012. Emergence of *Aspergillus calidoustus* infection in the era of posttransplantation azole prophylaxis. *Transplantation*, 94(4), pp.403-410.

Eickenberg, H.U., Amin, M. and Lich Jr, R., 1975. Blastomycosis of the genitourinary tract. *The Journal of Urology*, 113(5), pp.650-652.

Eisen, D.P., MacGinley, R., Christensson, B., Larsson, L. and Woods, M.L., 2000. *Candida tropicalis* vertebral osteomyelitis complicating epidural catheterisation with disease paralleled by elevated D-arabinitol/L-arabinitol ratios. *European Journal of Clinical Microbiology and Infectious Diseases*, 19(1), pp.61-63.

Ekhtiari, M., Farahyar, S., Falahati, M., Razmjou, E., Ashrafi-Khozani, M., Ghasemi, Z. and Abbasi-Nejat, Z., 2017. The first report of onychomycosis caused by *Cryptococcus friedmannii* (*Naganishia friedmannii*) a basidiomycetous yeast. *Medical mycology case reports*, 15, pp.25-27.

El-Ani, A.S., 1966. A new species of *Leptosphaeria*, an etiologic agent of mycetoma. *Mycologia*, 58(3), pp.406-411.

Elsawy, A., Faidah, H., Ahmed, A., Mostafa, A. and Mohamed, F., 2015. *Aspergillus terreus* meningitis in immunocompetent patient: a case report. *Frontiers in Microbiology*, 6, p.1353.

El-Sayed Ahmed, M.M., Almanfi, A., Aftab, M., Singh, S.K., Mallidi, H.R. and Frazier, O.H., 2015. *Aspergillus* mediastinitis after orthotopic heart transplantation: a case report. *Texas Heart Institute Journal*, 42(5), pp.468-470.

Emara, M., Ahmad, S., Khan, Z., Joseph, L., Al-Obaid, I.M., Purohit, P. and Bafna, R., 2015. *Candida auris* candidemia in Kuwait, 2014.

Enweani, I.B., Ozan, C.C., Agbonlahor, D.E. and Ndip, R.N., 1996. Dermatophytosis in schoolchildren in Ekpoma, Nigeria: Dermatophytosen bei Schulkindern in Ekpoma, Nigeria. *Mycoses*, 39(7-8), pp.303-305.

Eren, D., Eroglu, E., Ulu Kilic, A., Atalay, M.A., Mumcu, N., Sipahioglu, M.H., Canoz, O., Koc, A.N. and Oymak, O., 2018. Cutaneous ulcerations caused by *Paecilomyces variotii* in a renal transplant recipient. *Transplant Infectious Disease*, 20(3), p.e12871.

Ergene, U., Akcali, Z., Ozbalci, D., Nese, N. and Senol, S., 2013. Disseminated aspergillosis due to *Aspergillus niger* in immunocompetent patient: a case report. *Case reports in infectious diseases*, 2013.

Ersal, T., Al-Hatmi, A.S., Dalyan Cilo, B., Curfs-Breuker, I., Meis, J.F., Özkalemkaş, F., Ener, B. and van Diepeningen, A.D., 2015. Fatal disseminated infection with *Fusarium petroliphilum*. *Mycopathologia*, 179(1), pp.119-124.

Ertam, I., Aytimur, D. and Alper, S., 2007. *Malassezia furfur* onychomycosis in an immunosuppressed liver transplant recipient. *Indian Journal of Dermatology, Venereology and Leprology*, 73, p.425.

Esgin, H., Bulut, E. and Örü̇m, Ç., 2014. *Candida pelliculosa* endophthalmitis after cataract surgery: a case report. *BMC Research Notes*, 7(1), pp.1-3.

Esnakula, A.K., Summers, I. and Naab, T.J., 2013. Fatal disseminated *Fusarium* infection in a human immunodeficiency virus positive patient. *Case reports in infectious diseases*, 2013.

Fahal, A.H., Rahman, I.A., El-Hassan, A.M., Rahman, M.A.E. and Zijlstra, E.E., 2011. The safety and efficacy of itraconazole for the treatment of patients with eumycetoma due to *Madurella mycetomatis*. *Transactions of the Royal Society of Tropical Medicine and Hygiene*, 105(3), pp.127-132.

Fakih, M.G., Barden, G.E., Oakes, C.A. and Berenson, C.S., 1995. First reported case of *Aspergillus granulosis* infection in a cardiac transplant patient. *Journal of Clinical Microbiology*, 33(2), pp.471-473.

Fan, Y.M., Huang, W.M., Li, S.F., Wu, G.F., Li, W. and Chen, R.Y., 2009. Cutaneous phaeohyphomycosis of foot caused by *Curvularia clavata*. *Mycoses*, 52(6), pp.544-546.

Fanci, R., Pini, G., Bartolesi, A.M. and Pecile, P., 2013. Refractory disseminated fusariosis by *Fusarium verticillioides* in a patient with acute myeloid leukaemia relapsed after allogeneic hematopoietic stem cell transplantation: a case report and literature review. *Revista Iberoamericana de Micología*, 30(1), pp.51-53.

Farid, S., AbuSaleh, O., Liesman, R. and Sohail, M.R., 2017. Isolated cerebral mucormycosis caused by *Rhizomucor pusillus*. *Case Reports*, 2017, pp.bcr-2017.

Farina, C., Gotti, E., Parma, A., Naldi, L. and Goglio, A., 2007, June. Pheohyphomycotic soft tissue disease caused by *Alternaria alternata* in a kidney transplant patient: a case report and literature review. In *Transplantation proceedings* (Vol. 39, No. 5, pp. 1655-1659). Elsevier.

Fattahi, A., Sayyahfar, S., Lotfali, E., Ghasemi, R. and Mortezaeian, H., 2020. *Aspergillus flavus* endocarditis and meningitis in a child with marfan syndrome. *Current Medical Mycology*, 6(4), p.70.

Fattahi, A., Shirvani, F., Ayatollahi, A., Rezaei-Matehkolaei, A., Badali, H., Lotfali, E., Ghasemi, R., Pourpak, Z. and Firooz, A., 2021. Multidrug-resistant *Trichophyton mentagrophytes* genotype VIII in an Iranian family with generalized dermatophytosis: report of four cases and review of literature. *International Journal of Dermatology*, 60(6), pp.686-692.

Feldman, R., Cockerham, L., Buchan, B.W., Lu, Z. and Huang, A.M., 2016. Treatment of *Paecilomyces variotii* pneumonia with posaconazole: case report and literature review. *Mycoses*, 59(12), pp.746-750.

Feng, X., Ling, B., Yang, G., Yu, X., Ren, D. and Yao, Z., 2012. Prevalence and distribution profiles of *Candida parapsilosis*, *Candida orthopsilosis* and *Candida metapsilosis* responsible for superficial candidiasis in a Chinese university hospital. *Mycopathologia*, 173, pp.229-234.

Feng, P., Yin, S., Zhu, G., Li, M., Wu, B., Xie, Y., Ma, H., Zhang, J., Cheng, C., de Hoog, G.S. and Lu, C., 2015. Disseminated infection caused by *Emmonsia pasteuriana* in a renal transplant recipient. *The Journal of Dermatology*, 42(12), pp.1179-1182.

Fernández-García, O., Guerrero-Torres, L., Roman-Montes, C.M., Rangel-Cordero, A., Martínez-Gamboa, A., Ponce-de-Leon, A. and Gonzalez-Lara, M.F., 2021. Isolation of *Rhizopus microsporus* and *Lichtheimia corymbifera* from tracheal aspirates of two immunocompetent critically ill patients with COVID-19. *Medical Mycology Case Reports*, 33, pp.32-37.

Ferrer, C., Montero, J., Alió, J.L., Abad, J.L., Ruiz-Moreno, J.M. and Colom, F., 2003. Rapid molecular diagnosis of posttraumatic keratitis and endophthalmitis caused by *Alternaria infectoria*. *Journal of Clinical Microbiology*, 41(7), pp.3358-3360.

Fianchi, L., Picardi, M., Cudillo, L., Corvatta, L., Mele, L., Trape, G., Girmenia, C. and Pagano, L., 2004. Aspergillus niger infection in patients with haematological diseases: a report of eight cases. *Mycoses*, 47(3-4), pp.163-167.

Fike, J.M., Kollipara, R., Alkul, S. and Stetson, C.L., 2018. Case report of onychomycosis and tinea corporis due to *Microsporum gypseum*. *Journal of Cutaneous Medicine and Surgery*, 22(1), pp.94-96.

Fiona, L., Chew, M., Subrayan, V., Chong, P.P., Goh, M.C. and Ng, K.P., 2009. *Cladosporium cladosporioides* keratomycosis: a case report. *Japanese journal of ophthalmology*, 53(6), p.657.

Fisher, D.J., CHRISTY, C., SPAFFORD, P., MANISCALCO, W.M., HARDY, D.J. and GRAMAN, P.S., 1993. Neonatal *Trichosporon beigelii* infection: report of a cluster of cases in a neonatal intensive care unit. *The Pediatric infectious disease journal*, 12(2), pp.149-155.

Fischer, N., Ruef, C., Ebnöther, C. and Bächli, E.B., 2008. Rhinofacial *Conidiobolus coronatus* infection presenting with nasal enlargement. *Infection*, 36(6), pp.594-596.

Fletcher, C.L., Hay, R.J., Midgley, G. and Moore, M., 1998. Onychomycosis caused by infection with *Paecilomyces lilacinus*. *The British Journal of Dermatology*, 139(6), pp.1133-1135.

Fletcher, C.L., Moore, M.K. and Hay, R.J., 2001. Endonyx onychomycosis due to *Trichophyton soudanense* in two Somali siblings. *British Journal of Dermatology*, 145(4), pp.687-688.

Florescu, D.F., Iwen, P.C., Hill, L.A., Dumitru, I., Quader, M.A., Kalil, A.C. and Freifeld, A.G., 2009. Cerebral aspergillosis caused by *Aspergillus ustus* following orthotopic heart transplantation: case report and review of the literature. *Clinical transplantation*, 23(1), pp.116-120.

Ford, J.G., Agee, S. and Greenhaw, S.T., 2008. Successful medical treatment of a case of *Paecilomyces lilacinus* keratitis. *Cornea*, 27(9), pp.1077-1079.

Framil, V.M.D.S., Melhem, M.S., Szeszs, M.W., Corneta, E.C. and Zaitz, C., 2010. Pityriasis versicolor circinata: isolation of *Malassezia sympodialis*-Case report. *Anais Brasileiros de Dermatologia*, 85, pp.227-228.

Friedman, J.A., Wijdicks, E.F., Fulgham, J.R. and Wright, A.J., 2000, April. Meningoencephalitis due to *Blastomyces dermatitidis*: case report and literature review. In *Mayo Clinic Proceedings* (Vol. 75, No. 4, pp. 403-408). Elsevier.

Gabriel, F., Noel, T. and Accoceberry, I., 2012. *Lindnera* (*Pichia*) *fabianii* blood infection after mesenteric ischemia. *Medical Mycology*, 50(3), pp.310-314.

Gacser, A., Salomon, S., Schafer, W., 2005. Direct transformation of an clinical isolate of *Candida parapsilosis* using a dominant selection marker. *FEMS Microbiol. Lett.* 245, 117–121.

Gácsér, A., Schäfer, W., Nosanchuk, J.S., Salomon, S. and Nosanchuk, J.D., 2007. Virulence of *Candida parapsilosis*, *Candida orthopsilosis*, and *Candida metapsilosis* in reconstituted human tissue models. *Fungal Genetics and Biology*, 44(12), pp.1336-1341.

Gaisne, R., Jeddi, F., Morio, F., Le Clerc, Q.C., Hourmant, M., Blacho, G., Giral, M., Cantarovich, D., Dantal, J. and Ville, S., 2018. *Candida utilis* fungaemia following endoscopic intervention on ureteral stent in a kidney transplant recipient: Case report and a review of the literature. *Mycoses*, 61(8), pp.594-599.

Gaitán, A.C.R., Moret, A., Hontangas, J.L.L., Molina, J.M., López, A.I.A., Cabezas, A.H., Maseres, J.M., Arcas, R.C., Ruiz, M.D.G., Chiveli, M.Á. and Cantón, E., 2017. Nosocomial fungemia by *Candida auris*: first four reported cases in continental Europe. *Revista iberoamericana de micologia*, 34(1), pp.23-27.

Gallotti, A.C., Lombera, M., Pinto, K., Pinilla, I., Zaragoza, O. and Cuétara, M.S., 2023. *Kazachstania slooffiae*, an emerging pathogen to watch for in humans?. *Medical Mycology Case Reports*, 42, p.100604.

Galván Ledesma, A., Rodríguez Maqueda, M. and Talego Sancha, A., 2022. *Wickerhamomyces Anomalous* Postoperative Endophthalmitis. *Ocular Immunology and Inflammation*, pp.1-3.

Garbino, J., Ondrusova, A., Baligvo, E., Lew, D., Bouchuiguir-Wafa, K. and Rohner, P., 2002. Successful treatment of *Paecilomyces lilacinus* endophthalmitis with voriconazole. *Scandinavian journal of infectious diseases*, 34(9), pp.701-703.

Garey, K.W., Pendland, S.L., Van Huynh, T., Bunch, T.H., Jensen, G.M. and Pursell, K.J., 2001. Cunninghamella bertholletiae infection in a bone marrow transplant patient: amphotericin lung penetration, MIC determinations, and review of the literature. *Pharmacotherapy: The Journal of Human Pharmacology and Drug Therapy*, 21(7), pp.855-860.

Gautheret, A., Dromer, F., Bourhis, J.H. and Andremon, A., 1995. Trichoderma pseudokoningii as a cause of fatal infection in a bone marrow transplant recipient. *Clinical Infectious Diseases*, 20(4), pp.1063-1064.

Gavin, P.J., Sutton, D.A. and Katz, B.Z., 2002. Fatal endocarditis in a neonate caused by the dematiaceous fungus Phialemonium obovatum: case report and review of the literature. *Journal of clinical microbiology*, 40(6), pp.2207-2212.

Gene, J., Azon-Masoliver, A., Guarro, J., Ballester, F., Pujol, I., Llovera, M. and Ferrer, C., 1995. Cutaneous phaeohyphomycosis caused by Alternaria longipes in an immunosuppressed patient. *Journal of clinical microbiology*, 33(10), pp.2774-2776.

Geiger, A.M., Foxman, B. and Sobel, J.D., 1995. Chronic vulvovaginal candidiasis: characteristics of women with Candida albicans, C glabrata and no candida. *Sexually Transmitted Infections*, 71(5), pp.304-307.

Gené, J., Azón-Masoliver, A., Guarro, J., De Febrer, G., Martínez, A., Grau, C., Ortoneda, M. and Ballester, F., 2001. Cutaneous infection caused by Aspergillus ustus, an emerging opportunistic fungus in immunosuppressed patients. *Journal of Clinical Microbiology*, 39(3), pp.1134-1136.

Gharib<sup>1</sup>, S.J., IBRAHIM, D.R. and ABDULLAH, S.K., Molecular Identification of two Isolates of Nannizia Fulva Causing Tinea Capitis in Iraq. *Pakistan Journal of Medical & Health Sciences*, 16(1), 735-738

Gharehbolagh, S.A., Nasimi, M., Afshari, S.A.K., Ghasemi, Z. and Rezaie, S., 2017. First case of superficial infection due to Naganishia albida (formerly Cryptococcus albidus) in Iran: A review of the literature. *Current Medical Mycology*, 3(2), p.33.

Ghilardi, A., Massai, L., Gallo, A., Paccagnini, E. and Romano, C., 2007. Tinea capitis due to Trichophyton soudanense mimicking bacterial folliculitis. *Mycoses*, 50(2), pp.150-152.

Ghorpade, A., Anitha, V. and Ravindran, M., 2022. Colletotrichum asianum: A Novel Phytopathogen Causing Human Infection—A Case Report. *Cornea*, 41(11), pp.1458-1461.

Gip, L., 1994. Black piedra: the first case treated with terbinafine (Lamisil®). *British Journal of Dermatology*, 130(s43), pp.26-28.

Gits-Muselli, M., Benderdouche, M., Hamane, S., Mingui, A., Feuilhade de Chauvin, M., Guigue, N., Picat, M.Q., Bourrat, E., Petit, A., Bagot, M. and Alanio, A., 2017. Continuous increase of Trichophyton tonsurans as a cause of tinea capitis in the urban area of Paris, France: a 5-year-long study. *Medical mycology*, 55(5), pp.476-484.

Gkegkes, I.D., Kotrogiannis, I., Konstantara, F., Karetso, A., Tsiplakou, S., Fotiou, E., Stamopoulou, S., Papazacharias, C. and Paraskevopoulos, I.A., 2019. Cutaneous mucormycosis by Saksenaea vasiformis: an unusual case report and review of literature. *Mycopathologia*, 184, pp.159-167.

Gnat, S., Łagowski, D., Nowakiewicz, A. and Dyląg, M., 2020. Unusual dermatomycoses caused by Nannizzia nana: the geophilic origin of human infections. *Infection*, 48, pp.429-434.

Godet, C., Cateau, E., Rammaert, B., Grosset, M., Le Moal, G., Béraud, G., Martellosio, J.P., Iriart, X., Cadranel, J. and Roblot, F., 2017. Nebulized liposomal amphotericin B for treatment of pulmonary infection caused by Hormographiella aspergillata: case report and literature review. *Mycopathologia*, 182, pp.709-713.

Godoy, P., Nunes, F., Silva, V., Tomimori-Yamashita, J., Zaror, L. and Fischman, O., 2004. Onychomycosis caused by Fusarium solani and Fusarium oxysporum in São Paulo, Brazil. *Mycopathologia*, 157(3), pp.287-290.

Gompf, S.G., Paredes, A., Quilitz, R., Greene, J.N., Hiemenz, J.W. and Sandin, R.L., 1999. Paecilomyces lilacinus osteomyelitis in a bone marrow transplant patient. *INFECTIONS IN MEDICINE*, 16(11), pp.766-+.

Gong, J.Q., Liu, X.Q., Xu, H.B., Zeng, X.S., Chen, W. and Li, X.F., 2007. Deep dermatophytosis caused by Trichophyton rubrum: report of two cases. *Mycoses*, 50(2), pp.102-108.

González, G.M., Rojas, O.C., González, J.G., Kang, Y. and De Hoog, G.S., 2013. Chromoblastomycosis caused by *Rhinocladiella aquaspersa*. *Medical mycology case reports*, 2, pp.148-151.

Gorgievska-Sukarovska, B., Skerlev, M., Žele-Starčević, L., Husar, K. and Halasz, M., 2017. Kerion Celsi due to *Microsporum canis* with dermatophytide reaction. *Acta Dermatovenereologica Croatica*, 25(2), pp.151-151.

Gorman, S.R., Magiorakos, A.P., Zimmerman, S.K. and Craven, D.E., 2006. *Fusarium oxysporum* pneumonia in an immunocompetent host. *Southern medical journal*, 99(6), pp.613-617.

Govender, N.P., Magobo, R.E., Mpembe, R., Mhlanga, M., Matlapeng, P., Corcoran, C., Govind, C., Lowman, W., Senekal, M. and Thomas, J., 2018. *Candida auris* in South Africa, 2012–2016. *Emerging infectious diseases*, 24(11), p.2036.

Gompertz, O.F., Rodrigues, A.M., Fernandes, G.F., Bentubo, H.D., de Camargo, Z.P. and Petri, V., 2016. Case report: atypical clinical presentation of sporotrichosis caused by *Sporothrix globosa* resistant to itraconazole. *The American journal of tropical medicine and hygiene*, 94(6), p.1218.

Govender, N.P. and Grayson, W., 2019. Emergomycosis (*Emergomyces africanus*) in advanced HIV disease. *Dermatopathology*, 6(2), pp.63-69.

Garcia-Covarrubias, L., Bartlett, R., Barratt, D.M. and Wassermann, R.J., 2001. Rhino-orbitocerebral mucormycosis attributable to *Apophysomyces elegans* in an immunocompetent individual: case report and review of the literature. *Journal of Trauma and Acute Care Surgery*, 50(2), pp.353-357.

Gast, K.B., van der Hoeven, A., de Boer, M.G., van Esser, J.W., Kuijper, E.J., Verweij, J.J., van Keulen, P.H. and van der Beek, M.T., 2019. Two cases of *Emergomyces pasteurianus* infection in immunocompromised patients in the Netherlands. *Medical mycology case reports*, 24, pp.5-8.

Grava, S., Lopes, F.A.D., Cavallazzi, R.S., Grassi, M.F.N.N. and Svidzinski, T.I.E., 2016. A rare case of hemorrhagic pneumonia due to *Cladosporium cladosporioides*. *Jornal Brasileiro De Pneumologia*, 42, pp.392-394.

Grigoryan, K.V., Tollefson, M.M., Olson, M.A. and Newman, C.C., 2019. Pediatric tinea capitis caused by *Trichophyton violaceum* and *Trichophyton soudanense* in Rochester, Minnesota, United States. *International journal of dermatology*, 58(8), pp.912-915.

Gřler, N.C., Tosun, İ.L.K.N.U.R. and Aydin, F.A.R.U.K., 2017. The identification of *Meyerozyma guilliermondii* from blood cultures and surveillance samples in a university hospital in Northeast Turkey: A ten-year survey. *Journal de Mycologie MÚdicale*, 27(4), pp.506-513.

Grossi, O., Pineau, S., Sadot-Lebouvier, S., Hay, B., Delaunay, J., Mialhe, A.F., Bretonniere, C., Jeddi, F., Lavergne, R.A. and Le Pape, P., 2019. Disseminated mucormycosis due to *Lichtheimia corymbifera* during ibrutinib treatment for relapsed chronic lymphocytic leukaemia: a case report. *Clinical Microbiology and Infection*, 25(2), pp.261-263.

Guppy, K.H., Thomas, C., Thomas, K. and Anderson, D., 1998. Cerebral fungal infections in the immunocompromised host: a literature review and a new pathogen-*Chaetomium atrobrunneum*: case report. *Neurosurgery*, 43(6), pp.1463-1468.

Gupta, P., Kaur, H., Dwivedi, S., Agnihotri, S. and Rudramurthy, S.M., 2022. First case of *Tropicoporus tropicalis* keratitis in an immunocompetent host from India and review of the literature. *Journal of Medical Mycology*, 32(1), p.101205.

Guarro, J., Antolín-Ayala, M.I., Gené, J., Gutiérrez-Calzada, J., Nieves-Díez, C. and Ortoneda, M., 1999. Fatal case of *Trichoderma harzianum* infection in a renal transplant recipient. *Journal of clinical microbiology*, 37(11), pp.3751-3755.

Guarro, J., Nucci, M., Akiti, T., Gené, J., Barreiro, M.D.G.C. and Gonçalves, R.T., 2000. Fungemia due to *Fusarium sacchari* in an immunosuppressed patient. *Journal of clinical microbiology*, 38(1), pp.419-421.

Guarro, J., Svidzinski, T.E., Zaror, L., Forjaz, M.H., Gené, J. and Fischman, O., 1998. Subcutaneous hyalohyphomycosis caused by *Colletotrichum gloeosporioides*. *Journal of Clinical Microbiology*, 36(10), pp.3060-3065.

Guarro, J., Akiti, T., Horta, R.A., Morizot Leite-Filho, L.A., Gené, J., Ferreira-Gomes, S., Aguilar, C. and Ortoneda, M., 1999. Mycotic keratitis due to *Curvularia senegalensis* and in vitro antifungal susceptibilities of *Curvularia* spp. *Journal of clinical microbiology*, 37(12), pp.4170-4173.

Guarro, J., Mayayo, E., Tapiol, J., Aguilar, C. and Cano, J., 1999. *Microsphaeropsis olivacea* as an etiological agent of human skin infection. *Medical Mycology*, 37(2), pp.133-137.

Guccion, J.G., Rohatgi, P.K., Saini, N.B., French, A., Tavaloki, S. and Barr, S., 1996. Disseminated blastomycosis and acquired immunodeficiency syndrome: a case report and ultrastructural study. *Ultrastructural pathology*, 20(5), pp.429-435.

H. C. Gughani, V. Ramesh, N. Sood, J. Guarro, Moin-Ul-Haq, A. Paliwal-Joshi, B. Singh & R. Makkar (2006) Cutaneous phaeohyphomycosis caused by *Cladosporium oxysporum* and its treatment with potassium iodide, *Medical Mycology*, 44:3, 285-288, DOI: 10.1080/13693780500294824

Guo, J., Zhang, M., Qiao, D., Shen, H., Wang, L., Wang, D., Li, L., Liu, Y., Lu, H., Wang, C. and Ding, H., 2021. Prevalence and Antifungal Susceptibility of *Candida parapsilosis* Species Complex in Eastern China: A 15-Year Retrospective Study by ECIFIG. *Frontiers in microbiology*, 12, p.644000.

Gupta, N., Kumar, A., Singh, G., Ratnakar, G., Vinod, K.S. and Wig, N., 2017. Breakthrough mucormycosis after voriconazole use in a case of invasive fungal rhinosinusitis due to *Curvularia lunata*. *Drug Discoveries & Therapeutics*, 11(6), pp.349-352.

Gürcan, Ş., Tikveşli, M., Üstündağ, S. and Beyza, E.N.E.R., 2013. A case report on *Aspergillus lentulus* pneumonia. *Balkan medical journal*, 2013(4), pp.429-431.

Gyotoku, H., Izumikawa, K., Ikeda, H., Takazono, T., Morinaga, Y., Nakamura, S., Imamura, Y., Nishino, T., Miyazaki, T., Takeya, H. and Yamamoto, Y., 2012. A case of bronchial aspergillosis caused by *Aspergillus udagawae* and its mycological features. *Medical Mycology*, 50(6), pp.631-636.

Hadaschik, E., Koschny, R., Willinger, B., Hallscheidt, P., Enk, A. and Hartschuh, W., 2012. Pulmonary, rhino-orbital and cutaneous mucormycosis caused by *Rhizomucor pusillus* in an immunocompromised patient. *Clinical and experimental dermatology*, 37(4), pp.355-357.

Hahn, R.C., Rodrigues, A.M., Fontes, C.J.F., Nery, A.F., Tadano, T., Júnior, L.D.P.Q. and de Camargo, Z.P., 2014. Case report: Fatal fungemia due to *Paracoccidioides lutzii*. *The American journal of tropical medicine and hygiene*, 91(2), p.394.

Hajjeh, R.A. and Blumberg, H.M., 1995. Bloodstream infection due to *Trichosporon beigelii* in a burn patient: case report and review of therapy. *Clinical infectious diseases*, 20(4), pp.913-916.

Halim, I., Singh, P., Sarfraz, A., Kokkayil, P., Pati, B.K., Thakuria, B. and Raj, A., 2021. Fungal Keratitis Due to *Fusarium lichenicola*: A Case Report and Global Review of *Fusarium lichenicola* Keratitis. *Journal of Fungi*, 7(11), p.889.

Hamal, P., Ostransky, J., Dendis, M., Horváth, R., Ruzicka, F., Buchta, V., Vejsova, M., Sauer, P., Hejnar, P. and Raclavsky, V., 2008. A case of endocarditis caused by the yeast *Pichia fabianii* with biofilm production and developed in vitro resistance to azoles in the course of antifungal treatment. *Sabouraudia*, 46(6), pp.601-605.

Hardjasudarma, M., Willis, B., Black-Payne, C. and Edwards, R., 1995. Pediatric spinal blastomycosis: case report. *Neurosurgery*, 37(3), pp.534-536.

Harris, J.E., Sutton, D.A., Rubin, A., Wickes, B., De Hoog, G.S. and Kovarik, C., 2009. *Exophiala spinifera* as a cause of cutaneous phaeohyphomycosis: case study and review of the literature. *Medical mycology*, 47(1), pp.87-93.



Hazen, K.C., Theisz, G.W. and Howell, S.A., 1999. Chronic urinary tract infection due to *Candida utilis*. *Journal of clinical microbiology*, 37(3), pp.824-827.

Heslop, O.D., De Ceulaer, K., Rainford, L. and Nicholson, A.M., 2015. A case of *Candida orthopsilosis* associated septic arthritis in a patient with Systemic Lupus Erythematosus (SLE). *Medical mycology case reports*, 7, pp.1-3.

Hecker, M.S., Weinberg, J.M., Bagheri, B., Tangoren, I.A. and Rudikoff, D., 1997. Cutaneous *Paecilomyces lilacinus* infection: report of two novel cases. *Journal of the American Academy of Dermatology*, 37(2), pp.270-271.

Heiblig, M., Bozzoli, V., Saison, J., Thomas, X., De Croze, D., Traverse-Glehen, A., Cosmidis, A., Chidiac, C., Ferry, T., Alanio, A. and Bienvenu, A.L., 2015. Combined medico-surgical strategy for invasive sino-orbito-cerebral breakthrough fungal infection with *Hormoglyphiella aspergillata* in an acute leukaemia patient. *Mycoses*, 58(5), pp.308-312.

Heidrich, D., González, G.M., Pagani, D.M., Ramírez-Castrillón, M. and Scroferneker, M.L., 2017. Chromoblastomycosis caused by *Rhinocladiella similis*: Case report. *Medical mycology case reports*, 16, pp.25-27.

Hall, V.C., Goyal, S., Davis, M.D. and Walsh, J.S., 2004. Cutaneous hyalohyphomycosis caused by *Paecilomyces lilacinus*: report of three cases and review of the literature. *International journal of dermatology*, 43(9), pp.648-653.

Hallur, V., Prakash, H., Sable, M., Preetam, C., Purushotham, P., Senapati, R., Shankarnarayan, S.A., Bag, N.D. and Rudramurthy, S.M., 2021. *Cunninghamella arunalokei* a new species of *Cunninghamella* from India causing disease in an immunocompetent individual. *Journal of Fungi*, 7(8), p.670.

Hawkes, M., Rennie, R., Sand, C. and Vaudry, W., 2005. *Aureobasidium pullulans* infection: fungemia in an infant and a review of human cases. *Diagnostic microbiology and infectious disease*, 51(3), pp.209-213.

He, D., Quan, M., Zhong, H., Chen, Z., Wang, X., He, F., Qu, J., Zhou, T., Lv, X. and Zong, Z., 2021. *Emergomyces orientalis* emergomycosis diagnosed by metagenomic next-generation sequencing. *Emerging Infectious Diseases*, 27(10), p.2740.

Hemashettar, B.M., Patil, R.N., O'Donnell, K., Chaturvedi, V., Ren, P. and Padhye, A.A., 2011. Chronic rhinofacial mucormycosis caused by *Mucor irregularis* (*Rhizomucor variabilis*) in India. *Journal of Clinical Microbiology*, 49(6), pp.2372-2375.

Hemo, I., Pe, J. and Polacheck, I., 1989. *Fusarium oxysporum* keratitis. *Ophthalmologica*, 198(1), pp.3-7.

Hennequin, C., Bouree, P., Hiesse, C., Dupont, B. and Charpentier, B., 1996. Spondylodiskitis due to *Candida albicans*: report of two patients who were successfully treated with fluconazole and review of the literature. *Clinical infectious diseases*, 23(1), pp.176-178.

Hennequin, C., Chouaki, T., Pichon, J.C., Strunski, V. and Raccurt, C., 2000. Otitis externa due to *Trichoderma longibrachiatum*. *European Journal of Clinical Microbiology and Infectious Diseases*, 19(8), p.641.

Herbrecht, R., Kessler, R., Kravanja, C., Meyer, M.H., Waller, J. and Letscher-Bru, V., 2004. Successful treatment of *Fusarium proliferatum* pneumonia with posaconazole in a lung transplant recipient. *The Journal of heart and lung transplantation*, 23(12), pp.1451-1454.

Hernández-Hernández, F., Vargas-Arzola, J., Ríos-Cruz, O.P., Córdova-Martínez, E., Manzano-Gayosso, P. and Segura-Salvador, A., 2018. First case of chromoblastomycosis due to *Phoma insulana*. *Enfermedades infecciosas y microbiología clinica (English ed.)*, 36(2), pp.95-99.

Heslop, O.D., De Ceulaer, K., Rainford, L. and Nicholson, A.M., 2015. A case of *Candida orthopsilosis* associated septic arthritis in a patient with Systemic Lupus Erythematosus (SLE). *Medical mycology case reports*, 7, pp.1-3.

Hilmioglu, S., Metin, D.Y., Tasbakan, M., Pullukcu, H., Akalin, T. and Tumbay, E., 2015. Skin infection on both legs caused by *Acremonium strictum* (case report). *Annals of Saudi Medicine*, 35(5), pp.406-408.

Hipolito, E., Faria, E., Alves, A.F., De Hoog, G.S., Anjos, J., Gonçalves, T., Morais, P.V. and Estevão, H., 2009. *Alternaria* infectoria brain abscess in a child with chronic granulomatous disease. *European journal of clinical microbiology & infectious diseases*, 28, pp.377-380.

Hitoto, H., Pihet, M., Weil, B., Chabasse, D., Bouchara, J.P. and Rachieru-Sourisseau, P., 2010. *Acremonium strictum* fungaemia in a paediatric immunocompromised patient: diagnosis and treatment difficulties. *Mycopathologia*, 170(3), pp.161-164.

Holley, K., Muldoon, M. and Tasker, S., 2002. *Coccidioides immitis* osteomyelitis: a case series review. *Orthopedics*, 25(8), pp.827-832.

Hood, S.V., Moore, C.B., Cheesbrough, J.S., Mene, A. and Denning, D.W., 1997. Atypical eumycetoma caused by *Phialophora parasitica* successfully treated with itraconazole and flucytosine. *British Journal of Dermatology*, 136(6), pp.953-956.

Hoenigl, M., Aspeck, E., Valentin, T., Heiling, B., Seeber, K., Krause, R., Stammberger, H., Beham, A. and Buzina, W., 2013. Sinusitis and frontal brain abscess in a diabetic patient caused by the basidiomycete *Schizophyllum commune*: case report and review of the literature. *Mycoses*, 56(3), pp.389-393.

Höfling-Lima, A.L., Guarro, J., Freitas, D.D., Godoy, P., Gené, J., Souza, L.B.D., Zaror, L. and Romano, A.C., 2005. Clinical treatment of corneal infection due to *Fonsecaea pedrosoi*: case report. *Arquivos brasileiros de oftalmologia*, 68, pp.270-272.

Homa, M., Manikandan, P., Saravanan, V., Revathi, R., Anita, R., Narendran, V., Panneerselvam, K., Shobana, C.S., Aidarous, M.A., Galgóczy, L. and Vágvölgyi, C., 2018. *Exophiala dermatitidis* endophthalmitis: case report and literature review. *Mycopathologia*, 183, pp.603-609.

Hospenthal, D.R., Chung, K.K., Lairet, K., Thompson, E.H., Guarro, J., Renz, E.M. and Sutton, D.A., 2011. *Saksenaea erythrospora* infection following combat trauma. *Journal of clinical microbiology*, 49(10), pp.3707-3709.

Houaida, T., Sourour, N., Ines, H., Imen, F., Moez, M., Nahed, K., Hayet, S., Fattouma, M., Moez, E. and Ali, A., 2022. A case report of a mucormycosis caused by *Lichtheimia ramosa* in a patient with acute myeloid leukemia. *Reviews in Medical Microbiology*, 33(1), pp.e4-e9.

Houchonou, F.H., Runge, J., Ganser, A., Hartmann, C., Raab, P. and Krauss, J.K., 2022. Stereotactic biopsy of a brain lesion caused by *hormographiella aspergillata*. *Surgical Neurology International*, 13(596), p.1.

Howard, S.J., Walker, S.L., Andrew, S.M., Borman, A.M., Johnson, E.M. and Denning, D.W., 2006. Sub-cutaneous phaeohyphomycosis caused by *Cladophialophora devriesii* in a United Kingdom resident. *Medical Mycology*, 44(6), pp.553-556.

Hsieh, T.T., Tseng, H.K., Sun, P.L., Wu, Y.H. and Chen, G.S., 2013. Disseminated zygomycosis caused by *Cunninghamella bertholletiae* in patient with hematological malignancy and review of published case reports. *Mycopathologia*, 175, pp.99-106.

Hu, L., Wang, S., Sun, D., Chu, J., Lai, B. and Liu, Y., 2021. First case of bloodstream infection of *Trichosporon loubieri* in a patient with B-cell lymphocytic leukemia in China. *Journal of Infection and Chemotherapy*, 27(1), pp.86-89.

Huang, W.M., Fan, Y.M., Li, W. and Yang, W.W., 2011. Brain abscess caused by *Cladophialophora bantiana* in China. *Journal of medical microbiology*, 60(12), pp.1872-1874.

Huang, C., Peng, Y., Zhang, Y., Li, R., Wan, Z. and Wang, X., 2019. Deep dermatophytosis caused by *Trichophyton rubrum*. *The Lancet Infectious Diseases*, 19(12), p.1380.

Huang, C., Zhang, Y., Song, Y., Wan, Z., Wang, X. and Li, R., 2019. Phaeohyphomycosis caused by *Phialophora americana* with CARD9 mutation and 20-year literature review in China. *Mycoses*, 62(10), pp.908-919.

Huang, C.Y., Peng, C.C., Hsu, C.H., Chang, J.H., Chiu, N.C. and Chi, H., 2020. Systemic infection caused by *Malassezia pachydermatis* in infants: Case series and review of the literature. *The Pediatric infectious disease journal*, 39(5), pp.444-448.

Huang, Y.T., Liaw, S.J., Liao, C.H., Yang, J.L., Lai, D.M., Lee, Y.C. and Hsueh, P.R., 2008. Catheter-related septicemia due to *Aureobasidium pullulans*. *International Journal of Infectious Diseases*, 12(6), pp.e137-e139.

Hubka, V., Dobiášová, S., Dobiáš, R. and Kolařík, M., 2014. *Microsporum aenigmaticum* sp. nov. from *M. gypseum* complex, isolated as a cause of tinea corporis. *Sabouraudia*, 52(4), pp.387-396.

Hubka, V., Mencl, K., Skorepova, M., Lyskova, P. and Zalabska, E., 2011. Phaeohyphomycosis and onychomycosis due to *Chaetomium* spp., including the first report of *Chaetomium brasiliense* infection. *Medical Mycology*, 49(7), pp.724-733.

Husain, S., Muñoz, P., Forrest, G., Alexander, B.D., Somani, J., Brennan, K., Wagener, M.M. and Singh, N., 2005. Infections due to *Scedosporium apiospermum* and *Scedosporium prolificans* in transplant recipients: clinical characteristics and impact of antifungal agent therapy on outcome. *Clinical Infectious Diseases*, 40(1), pp.89-99.

Iwasawa, M., Yorifuji, K., Sano, A., Takahashi, Y. and Nishimura, K., 2009. A case of kerion celsi caused by *Microsporum gypseum* (*Arthroderma gypseum*) in a child. *Nippon Ishinkin Gakkai Zasshi*, 50(3), pp.155-160.

Iwasawa, M.T., Togawa, Y., Akita, F., Kambe, N., Matsue, H., Yaguchi, T. and Nishimura, K., 2012. Kerion celsi due to *Arthroderma incurvatum* infection in a Sri Lankan child: species identification and analysis of area-dependent genetic polymorphism. *Medical Mycology*, 50(7), pp.690-698.

Izumi, K., Hisata, Y. and Hazama, S., 2009. A rare case of infective endocarditis complicated by *Trichosporon asahii* fungemia treated by surgery. *Annals of thoracic and cardiovascular surgery: official journal of the Association of Thoracic and Cardiovascular Surgeons of Asia*, 15(5), pp.350-353.

Irek, E.O., Obadare, T.O., Udonwa, P.A., Laoye, O., Abiri, O.V., Adeoye, A.O. and Aboderin, A.O., 2017. *Cylindrocarpon lichenicola* keratomycosis in Nigeria: the challenge of limited access to effective antimicrobials. *African Journal of Laboratory Medicine*, 6(1), pp.1-3.

Isabel Cristina, R.S., Diana, A. and Karen, A., 2020. Breakthrough *Hormoglyphiella aspergillata* infection in a patient with acute myeloid leukemia receiving posaconazole prophylaxis: a case report and review. *Mycopathologia*, 185, pp.1069-1076.

Irles, D., Bonadona, A., Pofelski, J., Laramas, M., Molina, L., Lantuejoul, S., Brenier-Pinchart, M.P., Bagueta, J.P. and Barnoud, D., 2004. *Aspergillus flavus* endocarditis on a native valve. *Archives des Maladies du Cœur et des Vaisseaux*, 97(2), pp.172-175.

Istorico, L.J., Sanders, M., Jacobs, R.F., Gilleon, S., Glasier, C. and Bradsher, R.W., 1992. Otitis media due to blastomycosis: report of two cases. *Clinical infectious diseases*, 14(1), pp.355-358.

Iwen, P.C., Rupp, M.E., Langnas, A.N., Reed, E.C. and Hinrichs, S.H., 1998. Invasive pulmonary aspergillosis due to *Aspergillus terreus*: 12-year experience and review of the literature. *Reviews of Infectious Diseases*, 26(5), pp.1092-1097.

Iwen, P.C., Tarantolo, S.R., Sutton, D.A., Rinaldi, M.G. and Hinrichs, S.H., 2000. Cutaneous infection caused by *Cylindrocarpon lichenicola* in a patient with acute myelogenous leukemia. *Journal of clinical microbiology*, 38(9), pp.3375-3378.

Iwen, P.C., Freifeld, A.G., Sigler, L. and Tarantolo, S.R., 2005. Molecular identification of *Rhizomucor pusillus* as a cause of sinus-orbital zygomycosis in a patient with acute myelogenous leukemia. *Journal of clinical microbiology*, 43(11), pp.5819-5821.

Iwen, P.C., Sigler, L., Noel, R.K. and Freifeld, A.G., 2007. *Mucor circinelloides* was identified by molecular methods as a cause of primary cutaneous zygomycosis. *Journal of Clinical Microbiology*, 45(2), pp.636-640.

Jacobs, F., Byl, B., Bourgeois, N., Coremans-Pelseneer, J., Florquin, S., Depre, G., Van De Stadt, J., Adler, M., Gelin, M. and Thys, J.P., 1992. Trichoderma viride infection in a liver transplant recipient: Infektion eines Lebertransplantierten durch Trichoderma viride. *Mycoses*, 35(11-12), pp.301-303.

Jain, N., Jinagal, J., Kaur, H., Ghosh, A., Gupta, S., Ram, J. and Rudramurthy, S.M., 2019. Ocular infection caused by *Hormographiella aspergillata*: a case report and review of literature. *Journal de Mycologie Médicale*, 29(1), pp.71-74.

James, E.A., Orchard, K., McWhinney, P.H.W., Warnock, D.W., Johnson, E.M., Mehta, A.B. and Kibbler, C.C., 1997. Disseminated infection due to *Cylindrocarpon lichenicola* in a patient with acute myeloid leukemia. *Journal of Infection*, 34(1), pp.65-67.

James, M.J., Lasker, B.A., McNeil, M.M., Shelton, M., Warnock, D.W. and Reiss, E., 2000. Use of a repetitive DNA probe to type clinical and environmental isolates of *Aspergillus flavus* from a cluster of cutaneous infections in a neonatal intensive care unit. *Journal of Clinical Microbiology*, 38(10), pp.3612-3618.

JANG, B.S., JO, J.H., OH, C.K., JANG, H.S. and KWON, K.S., 2002. A case of kerion celsi caused by Trichophyton mentagrophytes. *Korean Journal of Medical Mycology*, pp.86-91.

Jaramillo, S. and Varon, C.L., 2013. *Curvularia lunata* endophthalmitis after penetrating ocular trauma. *Retinal Cases and Brief Reports*, 7(4), pp.315-318.

Jaspers, G.J., Werrij, B.G., Jagtman, B.A. and Loza, B., 2011. Severe kerion celsi due to Trichophyton mentagrophytes: a case report. *Acta Paediatrica*, 100(10), pp.e181-e183.

Jayasinghe R. D., W. A. M. U. L. Abeysinghe, P. I. Jayasekara, Y. S. Mohomed, B. S. M. S. Siriwardena, "Unilateral Cervical Lymphadenopathy due to *Cladosporium oxysporum*: A Case Report and Review of the Literature", *Case Reports in Pathology*, vol. 2017, Article ID 5036514, 4 pages, 2017. <https://doi.org/10.1155/2017/5036514>

Jiang, Z., Wang, Y., Jiang, Y., Xu, Y. and Meng, B., 2013. Vertebral osteomyelitis and epidural abscess due to *Aspergillus nidulans* resulting in spinal cord compression: Case report and literature review. *Journal of international medical research*, 41(2), pp.502-510.

Joly, V., Belmatoug, N., Leperre, A., Robert, J., Jault, F., Carbon, C. and Yeni, P., 1997. Pacemaker endocarditis due to *Candida albicans*: case report and review. *Clinical infectious diseases*, 25(6), pp.1359-1362.

Jossi, M., Ambrosioni, J., Macedo-Vinas, M. and Garbino, J., 2010. Invasive fusariosis with prolonged fungemia in a patient with acute lymphoblastic leukemia: case report and review of the literature. *International Journal of Infectious Diseases*, 14(4), pp.e354-e356.

Jumaa, P.A., Lightowler, C., Baker, L.R. and Das, S.S., 1995. Cutaneous infection caused by *Phialophora richardsiae* treated successfully by surgical excision in an immunocompromised patient. *The Journal of infection*, 30(3), pp.261-262.

Jun, J.H., Ryoo, N.H. and Chang, S.D., 2014. A Case of Phoma glomerata Keratitis Occurred in Recurrent Herpes Simplex Keratitis Cicatrix. *Journal of the Korean Ophthalmological Society*, 55(8), pp.1229-1232.

Jung, J., Moon, Y.S., Yoo, J.A., Lim, J.H., Jeong, J. and Jun, J.B., 2018. Investigation of a nosocomial outbreak of fungemia caused by *Candida pelliculosa* (*Pichia anomala*) in a Korean tertiary care center. *Journal of Microbiology, Immunology and Infection*, 51(6), pp.794-801.

Júnior, M.C., de Moraes Arantes, A., Silva, H.M., Costa, C.R. and Silva, M.D.R.R., 2013. *Acremonium kiliense*: case report and review of published studies. *Mycopathologia*, 176, pp.417-421.

Kabtani, J., Militello, M. and Ranque, S., 2022. *Coniochaeta massiliensis* sp. nov. Isolated from a Clinical Sampl28. *Journal of Fungi*, 8(10), p.999.

Kamalam, A., Ajithadass, K., Sentamilselvi, G. and Thambiah, A.S., 1992. Paronychia and black discoloration of a thumb nail caused by *Curvularia lunata*. *Mycopathologia*, 118, pp.83-84.

Kamei, K., Unno, H., Nagao, K., Kuriyama, T., Nishimura, K. and Miyaji, M., 1994. Allergic bronchopulmonary mycosis caused by the basidiomycetous fungus *Schizophyllum commune*. *Clinical Infectious Diseases*, 18(3), pp.305-309.

Kamoshita, M., Matsumoto, Y., Nishimura, K., Katono, Y., Murata, M., Ozawa, Y., Shimmura, S. and Tsubota, K., 2015. *Wickerhamomyces anomalus* fungal keratitis responds to topical treatment with antifungal micafungin. *Journal of Infection and Chemotherapy*, 21(2), pp.141-143.

Kaneko, Y., Oinuma, K.I., Terachi, T., Arimura, Y., Niki, M., Yamada, K., Takeya, H. and Mizutani, T., 2018. Successful treatment of intestinal mycosis caused by a simultaneous infection with *Lichtheimia ramosa* and *Aspergillus calidoustus*. *Internal Medicine*, 57(16), pp.2421-2424.

Kang, D., Ran, Y., Li, C., Dai, Y. and Lama, J., 2013. Impetigo-Like Tinea Faciei Around the Nostrils Caused by *Arthroderma vanbreuseghemii* Identified Using Polymerase Chain Reaction–Based Sequencing of Crusts. *Pediatric Dermatology*, 30(6), pp.e136-e137.

Kang, Y., Li, L., Zhu, J., Zhao, Y. and Zhang, Q., 2013. Identification of *Fusarium* from a patient with fungemia after multiple organ injury. *Mycopathologia*, 176(1), pp.151-155.

Kang, D., Jiang, X., Wan, H., Ran, Y., Hao, D. and Zhang, C., 2014. *Mucor irregularis* infection around the inner canthus cured by amphotericin B: a case report and review of published literatures. *Mycopathologia*, 178, pp.129-133.

Kantarcioğlu, A.S., Celkan, T., Yücel, A., Mikami, Y., Kurugoglu, S., Mitani, H. and Altas, K., 2009. Fatal *Trichoderma harzianum* infection in a leukemic pediatric patient. *Medical Mycology*, 47(2), pp.207-215.

Kantarcioğlu, A.S., Guarro, J., de Hoog, G.S., Apaydin, H., Kiraz, N., Balkan, I.I. and Ozaras, R., 2016. A case of central nervous system infection due to *Cladophialophora bantiana*. *Revista Iberoamericana de Micología*, 33(4), pp.237-241.

Kataoka-Nishimura, S., Akiyama, H., Saku, K., Kashiwa, M., Mori, S., Tanikawa, S., Sakamaki, H. and Onozawa, Y., 1998. Invasive infection due to *Trichosporon cutaneum* in patients with hematologic malignancies. *Cancer: Interdisciplinary International Journal of the American Cancer Society*, 82(3), pp.484-487.

Katkar, V.J., Tankhiwale, S.S. and Kurhade, A., 2011. *Fusarium soloni* mycetoma. *Indian Journal of Dermatology*, 56(3), p.315.

Kaufmann, C., Arnold, M., Schipf, A., Bruderer, V.L. and Iselin, K.C., 2021. *Tintelnolia destructans* keratitis: A clinicopathological report and review of the literature. *Cornea*, 40(3), pp.380-382.

Kaur, R., Bala, K., Ahuja, R.B., Srivastav, P. and Bansal, U., 2014. Primary cutaneous mucormycosis in a patient with burn wounds due to *Lichtheimia ramosa*. *Mycopathologia*, 178(3), pp.291-295.

Kaur, H., Shankarnarayana, S.A., Hallur, V., Muralidharan, J., Biswal, M., Ghosh, A.K., Ray, P., Chakrabarti, A. and Rudramurthy, S.M., 2020. Prolonged outbreak of *Candida krusei* candidemia in paediatric ward of tertiary care hospital. *Mycopathologia*, 185(2), pp.257-268.

Kaushik, S., Ram, J., Chakrabarty, A., Dogra, M.R., Brar, G.S. and Gupta, A., 2001. *Curvularia lunata* endophthalmitis with secondary keratitis. *American journal of ophthalmology*, 131(1), pp.140-142.

Kaushik, R., Chander, J., Gupta, S., Sharma, R. and Punia, R.S., 2012. Fatal primary cutaneous zygomycosis caused by *Saksenaea vasiformis*: case report and review of literature. *Surgical Infections*, 13(2), pp.125-129.

Kebbe, J. and Mador, M.J., 2016. *Exophiala pisciphila*: a novel cause of allergic bronchopulmonary mycosis. *Journal of thoracic disease*, 8(7), p.E538.

Kennedy, H.F., Simpson, E.M., Wilson, N., Richardson, M.D. and Michie, J.R., 1998. *Aspergillus flavus* endocarditis in a child with neuroblastoma. *Journal of Infection*, 36(1), pp.126-127.

Kessler, A.T., Kourtis, A.P. and Simon, N., 2002. Peripheral thromboembolism associated with *Malassezia furfur* sepsis. *The Pediatric infectious disease journal*, 21(4), pp.356-357.

Keyser, A., Schmid, F.X., Linde, H.J., Merk, J. and Birnbaum, D.E., 2002. Disseminated *Cladophialophora bantiana* infection in a heart transplant recipient. *The Journal of heart and lung transplantation*, 21(4), pp.503-505.

Khalid, S.N., Rizwan, N., Khan, Z.A., Najam, A., Khan, A.M., Almas, T., Khedro, T., Nagarajan, V.R., Alshamlan, A., Gronfula, A. and Alshehri, R., 2021. Fungal burn wound infection caused by *Fusarium dimerum*: A case series on a rare etiology. *Annals of Medicine and Surgery*, 70, p.102848.

Khan, Z.U., Ahmad, S., Brazda, A. and Chandy, R., 2009. *Mucor circinelloides* as a cause of invasive maxillofacial zygomycosis: an emerging dimorphic pathogen with reduced susceptibility to posaconazole. *Journal of clinical microbiology*, 47(4), pp.1244-1248.

Khan, S., Pillai, G.S., Vivek, V., Dinesh, K. and Karim, P.M., 2012. Post-operative endophthalmitis due to *Fusarium dimerum*. *Southeast Asian J Trop Med Public Health*, 43, pp.1484-1488.

Khan, S., Kumar, A., Bhaskaran, V., Chandran, S. and Dinesh, K., 2019. Chronic fungal osteomyelitis of the tibia due to *Acremonium curvulum*: A rare case. *Pan African Medical Journal*, 34(1).

Khazim, R.M., Debnath, U.K. and Fares, Y., 2006. *Candida albicans* osteomyelitis of the spine: progressive clinical and radiological features and surgical management in three cases. *European Spine Journal*, 15(9), pp.1404-1410.

Kieselová, K., Gomes, T., Santiago, F. and Martinha, H., 2021. Emerging cutaneous phaeohyphomycosis caused by *Alternaria infectoria*. *Acta Médica Portuguesa*, 34(11), pp.774-778.

Kim, D.M., Suh, M.K., Ha, G.Y. and Sohng, S.H., 2012. Fingernail onychomycosis due to *Aspergillus niger*. *Annals of dermatology*, 24(4), pp.459-463.

Kim, H., Yi, Y., Cho, S.Y., Lee, D.G., Chun, H.S., Park, C., Kim, Y.J. and Park, Y.J., 2022. Pneumonia due to *Schizophyllum commune* in a patient with acute myeloid leukemia: Case report and literature review. *Infection & Chemotherapy*, 54(1), p.195.

Kim, D.M., Lee, M.H., Suh, M.K., Ha, G.Y., Kim, H. and Choi, J.S., 2013. Onychomycosis caused by *Chaetomium globosum*. *Annals of dermatology*, 25(2), pp.232-236.

Kimura, M., Yaguchi, T., Sutton, D.A., Fothergill, A.W., Thompson, E.H. and Wickes, B.L., 2011. Disseminated human conidiobolomycosis due to *Conidiobolus lamprauges*. *Journal of Clinical Microbiology*, 49(2), pp.752-756.

Kimura, U., Yokoyama, K., Hiruma, M., Kano, R., Takamori, K. and Suga, Y., 2015. Tinea faciei caused by *Trichophyton mentagrophytes* (molecular type *Arthroderma benhamiae*) mimics impetigo: a case report and literature review of cases in Japan. *Medical mycology journal*, 56(1), pp.E1-E5.

Kiryu, H., 1985. A case of cutaneous *Curvularia* infection caused by *Curvularia trifolii*. In *Typical cutaneous fungus disease-rare case*, Proceedings of the 37th meeting of Japanese Society of Medical Mycology, Yokohama, 1985 (pp. 63-66).

Kitaura, T., Chikumi, H., Murota, H., Fujiwara, H., Touge, H., Okada, K., Nakamoto, M., Igishi, T., Burioka, N., Yaguchi, T. and Shimizu, E., 2014. A case of lung abscess due to *Aspergillus viridinutans* in a patient with aplastic anemia. *Kansenshogaku zasshi. The Journal of the Japanese Association for Infectious Diseases*, 88(6), pp.855-860.

Kleinotiene, G., Posiunas, G., Raistenskis, J., Zurauskas, E., Stankeviciene, S., Daugelaviciene, V. and Machaczka, M., 2013. Liposomal amphotericin B and surgery as successful therapy for pulmonary *Lichtheimia corymbifera* zygomycosis in a pediatric patient with acute promyelocytic leukemia on antifungal prophylaxis with posaconazole. *Medical Oncology*, 30(1), pp.1-7.

Kobayashi, H., Sano, A., Aragane, N., Fukuoka, M., Tanaka, M., Kawaura, F., Fukuno, Y., Matsuishi, E. and Hayashi, S., 2008. Disseminated infection by *Bipolaris spicifera* in an immunocompetent subject. *Medical mycology*, 46(4), pp.361-365.

Kobayashi, M., Kitahara, H., Yaguchi, T. and Sato, T., 2018. A case of tinea corporis on the arm caused by *Nannizzia gypsea* with dermatoscopic images. *JDDG-Journal der Deutschen Dermatologischen Gesellschaft*, 16(6), pp.784-786.

Koç, A.N., Utaş, C., Oymak, O. and Sehmen, E., 1998. Peritonitis due to *Acremonium strictum* in a patient on continuous ambulatory peritoneal dialysis. *Nephron*, 79(3), pp.357-358.

Kocsube, S., Toth, M., Vagvolgyi, C., Doczi, I., Pesti, M., Pocsi, I., Szabo, J., Varga, J., 2007. Occurrence and genetic variability of *Candida parapsilosis* sensu lato in Hungary. *J. Med. Microbiol.* 56, 190–195.

Kocyigit, I., Unal, A., Sipahioglu, M.H., Tokgoz, B., Oymak, O. and Utas, C., 2010. Peritonitis due to *Candida rugosa*: the first case report. *Peritoneal Dialysis International*, 30(5), pp.576-577.

Koç, A.N., Ukşal, Ü. and Oymak, O.K.T.A.Y., 2001. Case report. Successfully treated subcutaneous infection with *Sporothrix schenckii* in Turkey. *Mycoses*, 44(7-8), pp.330-333.

Kondo, M., Hiruma, M., Nishioka, Y., Mayuzumi, N., Mochida, K., Ikeda, S. and Ogawa, H., 2005. A case of chromomycosis caused by *Fonsecaea pedrosoi* and a review of reported cases of dematiaceous fungal infection in Japan. *Mycoses*, 48(3), pp.221-225.

Konidaris, V., Mersinoglou, A., Vyzantiadis, T.A., Papadopoulou, D., Boboridis, K.G. and Ekonomidis, P., 2013. Corneal transplant infection due to *Alternaria alternata*: a case report. *Case Reports in Ophthalmological Medicine*, 2013.

Koo, S., Klompas, M. and Marty, F.M., 2010. *Fonsecaea monophora* cerebral phaeohyphomycosis: case report of successful surgical excision and voriconazole treatment and review. *Medical mycology*, 48(5), pp.769-774.

Kordossis, T., Avlami, A., Velegraki, A., Stefanou, I., Georgakopoulos, G., Papalambrou, C. and Legakis, N.J., 1998. First report of *Cryptococcus laurentii* meningitis and a fatal case of *Cryptococcus albidus* cryptococcaemia in AIDS patients. *Medical mycology*, 36(5), pp.335-339.

Kordy, F.N., Al-Mohsen, I.Z., Hashem, F., Almodovar, E., Al Hajjar, S. and Walsh, T.J., 2004. Successful treatment of a child with posttraumatic necrotizing fasciitis caused by *Apophysomyces elegans*: case report and review of literature. *The Pediatric infectious disease journal*, 23(9), pp.877-879.

Korres, G., Meletiadis, J., Delides, A., Antoniadou, A., Petrikkos, G., Zerva, L., Yiotakis, I., Siopi, M., Kalogeropoulou, E., Georgantis, I. and Nikolopoulos, T.P., 2015. Fungal malignant otitis externa caused by *Alternaria chlamydospora*: first case report. *JMM Case Reports*, 2(1), p.e000021.

Kosa, P., Valach, M., Tomaska, L., Wolfe, K.H. and Nosek, J., 2006. Complete DNA sequences of the mitochondrial genomes of the pathogenic yeasts *Candida orthopsilosis* and *Candida metapsilosis*: insight into the evolution of linear DNA genomes from mitochondrial telomere mutants. *Nucleic acids research*, 34(8), pp.2472-2481.

Krcmery Jr, V., Jesenska, Z., Spanik, S., Gyarfas, J., Nogova, J., Botek, R., Mardiak, J., Sufliarsky, J., Sisolakova, J., Vanickova, M. and Kunova, A., 1997. Fungaemia due to *Fusarium* spp. in cancer patients. *Journal of hospital infection*, 36(3), pp.223-228.

Krisher, K.K., Holdridge, N.B., Mustafa, M.M., Rinaldi, M.G. and McGough, D.A., 1995. Disseminated *Microascus cirrosus* infection in pediatric bone marrow transplant recipient. *Journal of clinical microbiology*, 33(3), pp.735-737.

Krizsan, K., Toth, E., Nagy, L.G., Galgoczy, L., Manikandan, P., Chandrasekaran, M., Kadaikunnan, S., Alharbi, N.S., Vágvolgyi, C. and Papp, T., 2015. Molecular identification and antifungal susceptibility of *Curvularia australiensis*, *C. hawaiiensis* and *C. spicifera* isolated from human eye infections. *Mycoses*, 58(10), pp.603-609.

Kucukkaya, I.C., Gulsever, C.I., Dolas, I., Genc, G.E., Kuskucu, M.A., Sabanci, P.A. and Erturan, Z., 2023. First case of *Rhinocladiella mackenziei* brain abscess in Turkey: Case report and review of the literature. *Mycoses*, 66(9), pp.755-766.



Kutlu, M., Ergin, Ç., Bir, F., Hilmioğlu-Polat, S., Gümral, R., Necan, C., Koçyiğit, A. and Sayın-Kutlu, S., 2014. Pulmonary mucormycosis due to *Lichtheimia ramosa* in a patient with HIV infection. *Mycopathologia*, 178(1), pp.111-115.

Kutleša, M., Mlinarić-Missoni, E., Hatvani, L., Voncina, D., Simon, S., Lepur, D. and Baršić, B., 2012. Chronic fungal meningitis caused by *Aureobasidium proteae*. *Diagnostic microbiology and infectious disease*, 73(3), pp.271-272.

Kviliute, R., Paskevicius, A., Gulbinovic, J., Stulpinas, R. and Griskevicius, L., 2008. Nonfatal *Trichoderma citrinoviride* pneumonia in an acute myeloid leukemia patient. *Annals of Hematology*, 87(6), p.501.

Kwok, H.K., Chan, J.W., Li, I.W., Chu, S.Y. and Lam, C.W., 2009. Coccidioidomycosis as a rare cause of pneumonia in non-endemic areas: a short exposure history should not be ignored. *Respirology*, 14(4), pp.617-620.

Kudur, M.H., Prakash, P.Y. and Savitha, M., 2013. *Fusarium solani* causing quasi-invasive infection of the foot in an immunocompetent middle-aged man from South India. *Indian Journal of Dermatology*, 58(3), p.241.

Kueter, J.C., MacDiarmid, S.A. and Redman, J.F., 2002. Anuria due to bilateral ureteral obstruction by *Aspergillus flavus* in an adult male. *Urology*, 59(4), p.601.

Kulkarni, V.L., Kinikar, A.G., Bhalerao, D.S. and Roushani, S., 2017. A case of keratomycosis caused by *Fusarium solani* at rural tertiary care center. *Journal of clinical and diagnostic research: JCDR*, 11(9), p.DD01.

Kusenbach, G., Skopnik, H., Haase, G., Friedrichs, F. and Döhmen, H., 1992. *Exophiala dermatitidis* pneumonia in cystic fibrosis. *European journal of pediatrics*, 151, pp.344-346.

Lagrou, K., Massonet, C., Theunissen, K., Meersseman, W., Lontie, M., Verbeken, E., Van Eldere, J. and Maertens, J., 2005. Fatal pulmonary infection in a leukaemic patient caused by *Hormographiella aspergillata*. *Journal of medical microbiology*, 54(7), pp.685-688.

Lai, C.C., Lin, W.R., Chen, C.Y., Chang, K., Lu, P.L., Chen, Y.H., Lee, K.M., Chang, T.C. and Lin, C.Y., 2013. Acute meningitis caused by *Cladosporium sphaerospermum*. *The American Journal of the Medical Sciences*, 346(6), pp.523-525.

Lamas-Francis, D., Llovo-Taboada, J., Navarro, D., Touriño, R. and Rodríguez-Ares, T., 2022. Necrotizing scleritis due to *Hormographiella aspergillata*. *European Journal of Ophthalmology*, p.11206721221118209.

Lampert, R.P., Hutto, J.H., Donnelly, W.H. and Shulman, S.T., 1977. Pulmonary and cerebral mycetoma caused by *Curvularia pallescens*. *Journal of Pediatrics*, 91(4), pp.603-605.

Lang, R., Stokes, W., Lemaire, J., Johnson, A. and Conly, J., 2019. A case report of *Coccidioides posadasii* meningoencephalitis in an immunocompetent host. *BMC Infectious Diseases*, 19(1), pp.1-5.

Lastoria, C., Cascina, A., Bini, F., Di Matteo, A., Cavanna, C., Farina, C., Carretto, E. and Meloni, F., 2009. Pulmonary *Cladophialophora boppii* infection in a lung transplant recipient: case report and literature review. *The Journal of heart and lung transplantation*, 28(6), pp.635-637.

Lacasse, A. and Cleveland, K.O., 2009. *Trichosporon mucoides* fungemia in a liver transplant recipient: case report and review. *Transplant Infectious Disease*, 11(2), pp.155-159.

Latha, R., Sasikala, R., Muruganandam, N. and Prakash, M.S., 2010. Onychomycosis due to ascomycete *Chaetomium globosum*: a case report. *Indian Journal of Pathology and Microbiology*, 53(3), p.566.

Lazar, S.P., Lukaszewicz, J.M., Persad, K.A. and Reinhardt, J.F., 2014. Rhinocerebral *Mucor circinelloides* infection in immunocompromised patient following yogurt ingestion. *Delaware medical journal*, 86(8), pp.245-248.

Lee, J., Yew, W.W., Chiu, C.S.W., Wong, P.C., Wong, C.F. and Wang, E.P., 2002. Delayed sternotomy wound infection due to *Paecilomyces variotii* in a lung transplant recipient. *The Journal of heart and lung transplantation*, 21(10), pp.1131-1134.

Lee, W.G., Shin, J.H., Uh, Y., Kang, M.G., Kim, S.H., Park, K.H. and Jang, H.C., 2011. First three reported cases of nosocomial fungemia caused by *Candida auris*. *Journal of clinical microbiology*, 49(9), pp.3139-3142.

Lee, J., Cho, Y.G., Kim, D.S., Choi, S.I. and Lee, H.S., 2019. First case of catheter-related *Malassezia pachydermatis* fungemia in an adult. *Annals of laboratory medicine*, 39(1), pp.99-101.

Lee, J.M., Han, E., Kim, J., Park, J.H., Sung, G.H., Shin, J.H. and Park, Y.J., 2020. Five Korean cases of respiratory tract infection by filamentous basidiomycetes. *Annals of Laboratory Medicine*, 40(1), pp.84-87.

Letscher-Bru, V., Campos, F., Waller, J., Randriamahazaka, R., Candolfi, E. and Herbrecht, R., 2002. Successful outcome of treatment of a disseminated infection due to *Fusarium dimerum* in a leukemia patient. *Journal of clinical microbiology*, 40(3), pp.1100-1102.

Levenstadt, J.S., Poutanen, S.M., Mohan, S., Zhang, S. and Silverman, M., 2012. *Pleurostomophora richardsiae*—an insidious fungus presenting in a man 44 years after initial inoculation: a case report and review of the literature. *Canadian Journal of Infectious Diseases and Medical Microbiology*, 23, pp.110-113.

Levin, T.P., Baty, D.E., Fekete, T., Truant, A.L. and Suh, B., 2004. *Cladophialophora bantiana* brain abscess in a solid-organ transplant recipient: case report and review of the literature. *Journal of clinical microbiology*, 42(9), pp.4374-4378.

Li DM, Lun LD, Ge J, Zhang GJ, Li XL and de Hoog GS (2021) Case Report: *Rhizopus arrhizus* Rhino-Orbital-Cerebral Mycosis and Lethal Midline Granuloma: Another Fungal Etiological Agent. *Front. Med.* 8:578684. doi: 10.3389/fmed.2021.578684

Li, S., Perlman, J.I., Edward, D.P. and Weiss, R., 1998. Unilateral *Blastomyces dermatitidis* endophthalmitis and orbital cellulitis: a case report and literature review. *Ophthalmology*, 105(8), pp.1466-1470.

Li, D.M., Li, R.Y., De Hoog, G.S., Sudhadham, M. and Wang, D.L., 2011. Fatal *Exophiala* infections in China, with a report of seven cases. *Mycoses*, 54(4), pp.e136-e142.

Li, D.M., Li, R.Y., De Hoog, G.S., Wang, Y.X. and Wang, D.L., 2009. *Exophiala asiatica*, a new species from a fatal case in China. *Medical Mycology*, 47(1), pp.101-109.

Li, D.M., De Hoog, G.S., Saunte, D.L., van den Ende, A.G. and Chen, X.R., 2008. *Coniosporium epidermidis* sp. nov., a new species from human skin. *Studies in Mycology*, 61, pp.131-136.

Li, D.M. and Lun, L.D., 2012. *Mucor irregularis* infection and lethal midline granuloma: a case report and review of published literature. *Mycopathologia*, 174, pp.429-439.

Li Pomi, F., Di Bartolomeo, L., Vaccaro, M., Lentini, M., Cristadoro, S., Lucanto, M.C., Lombardo, M., Costa, S. and Borgia, F., 2022. *Malassezia* Folliculitis following Triple Therapy for Cystic Fibrosis. *Medicina*, 58(9), p.1204.

Liang, K.P., Tleyjeh, I.M., Wilson, W.R., Roberts, G.D. and Temesgen, Z., 2006. Rhino-orbitocerebral mucormycosis caused by *Apophysomyces elegans*. *Journal of clinical microbiology*, 44(3), pp.892-898.

Liang, G.Z., Xu, W.Q., Zheng, X.L., Mei, H., Lv, G.X., Shen, Y.N., Li, D.M. and Liu, W.D., 2018. Successful treatment by surgery of a primary cutaneous mucormycosis caused by *mucor irregularis*. *Mycopathologia*, 183, pp.445-449.

Lief, M.H., Caplivski, D., Bottone, E.J., Lerner, S., Vidal, C. and Huprikar, S., 2011. *Exophiala jeanselmei* infection in solid organ transplant recipients: report of two cases and review of the literature. *Transplant Infectious Disease*, 13(1), pp.73-79.

Lin, M.Y., Carmeli, Y., Zumsteg, J., Flores, E.L., Tolentino, J., Sreeramoju, P. and Weber, S.G., 2005. Prior antimicrobial therapy and risk for hospital-acquired *Candida glabrata* and *Candida krusei* fungemia: a case-case-control study. *Antimicrobial agents and chemotherapy*, 49(11), pp.4555-4560.

Liu, M., Xin, X., Li, J. and Chen, S., 2015. The first case of endophthalmitis due to *Rhinocladiella basitona* in an immunocompetent patient. *Diagnostic Microbiology and Infectious Disease*, 83(1), pp.49-52.

- Liu, Q., Kong, L., Hua, L. and Xu, S., 2021. Pulmonary Microascus cirrosus infection in an immunocompetent patient with bronchiectasis: A case report. *Respiratory Medicine Case Reports*, 34, p.101484.
- Lu, H., Marengo, M.F., Mihiu, C.N., Garcia-Manero, G. and Suarez-Almazor, M.E., 2012. Rare case of septic arthritis caused by *Candida krusei*: case report and literature review. *The Journal of Rheumatology*, 39(6), pp.1308-1309.
- Ioakimidou, A., Vyzantiadis, T.A., Sakellari, I., Arabatzis, M., Smias, C., Douka, V., Velegraki, A., Anagnostopoulos, A. and Malissiovas, N., 2013. An unusual cluster of *Acremonium kiliense* fungaemias in a haematopoietic cell transplantation unit. *Diagnostic Microbiology and Infectious Disease*, 75(3), pp.313-316.
- Lodato, F., Tamé, M.R., Montagnani, M., Sambri, V., Liguori, G., Azzaroli, F., Costigliola, P., Grazi, G., Roda, E. and Mazzella, G., 2006. Systemic fungemia and hepatic localizations of *Fusarium solani* in a liver transplanted patient: an emerging fungal agent. *Liver transplantation*, 12(11), pp.1711-1714.
- Lipový, B., Raška, F., Kocmanová, I., Hanslianová, M., Hladík, M., Holoubek, J., Bezdiček, M. and Macháček, C., 2021. *Trichoderma longibrachiatum* and *Aspergillus fischeri* infection as a cause of skin graft failure in a patient with critical burns after liver transplantation. *Journal of Fungi*, 7(6), p.487.
- Liang, G., Shen, Y., Lv, G., Zheng, H., Mei, H., Zheng, X., Kong, X., Blechert, O., Li, D. and Liu, W., 2018. Coccidioidomycosis: Imported and possible domestic cases in China: A case report and review, 1958-2017. *Mycoses*, 61(7), pp.506-513.
- Lin, H.C., Lin, H.Y., Su, B.H., Ho, M.W., Ho, C.M., Lee, C.Y., Lin, M.H., Hsieh, H.Y., Lin, H.C., Li, T.C. and Hwang, K.P., 2013. Reporting an outbreak of *Candida pelliculosa* fungemia in a neonatal intensive care unit. *Journal of Microbiology, Immunology and Infection*, 46(6), pp.456-462.
- Linsangan, L.C. and Ross, L.A., 1999. Coccidioides immitis infection of the neonate: two routes of infection. *The Pediatric infectious disease journal*, 18(2), pp.171-173.
- Liu, P.Y.F., 1998. Cryptococcal osteomyelitis: case report and review. *Diagnostic microbiology and infectious disease*, 30(1), pp.33-35.
- Liu, K., Howell, D.N., Perfect, J.R. and Schell, W.A., 1998. Morphologic criteria for the preliminary identification of *Fusarium*, *Paecilomyces*, and *Acremonium* species by histopathology. *American Journal of Clinical Pathology*, 109(1), pp.45-54.
- Liu, H., Lei, X., Chen, L., Hu, S., Li, G. and Deng, Z., 2021. Keratomycosis caused by a rare pathogen, *myrothecium verrucaria*. *Mycopathologia*, 186(6), pp.893-895.
- Liu, F., Liu, Y., Yuan, N., Zhang, X., Cao, M., Dong, J. and Zhang, J., 2021. Fixed cutaneous sporotrichosis due to *Sporothrix globosa*. *Clinical, Cosmetic and Investigational Dermatology*, pp.91-96.
- Lizano-Calvo, M., Brenes-Angulo, A. and Gómez-Alpízar, L., 2013. First case of onychomycosis caused by *Cylindrocarpon lichenicola* in an immunosuppressed patient in Costa Rica. *Acta Médica Costarricense*, 55(4), pp.199-204.
- Lo Cascio, G., Ligozzi, M., Maccacaro, L. and Fontana, R., 2004. Utility of molecular identification in opportunistic mycotic infections: a case of cutaneous *Alternaria infectoria* infection in a cardiac transplant recipient. *Journal of clinical microbiology*, 42(11), pp.5334-5336.
- Lonial, S., Williams, L., Carrum, G. and Ostrowski, M., 1997. *Neosartorya fischeri*: an invasive fungal pathogen in an allogeneic bone marrow transplant patient. *Bone marrow transplantation*, 19(7), pp.753-755.
- Lopes, J.O., Alves, S.H., Benevenga, J.P., Brauner, F.B., Castro, M.S. and Melchiors, E., 1994. *Curvularia lunata* peritonitis complicating peritoneal dialysis. *Mycopathologia*, 127(2), pp.65-67.
- Lopes, J.O., Alves, S.H., Rosa, A.C., Silva, C.B., Sarturi, J.C. and Souza, C.A.R., 1995. *Acremonium kiliense* peritonitis complicating continuous ambulatory peritoneal dialysis: report of two cases. *Mycopathologia*, 131(2), pp.83-85.

Lopes, L., Borges-Costa, J., Soares-Almeida, L., Filipe, P., Neves, F., Santana, A., Guerra, J. and Kutzner, H., 2013, October. Cutaneous alternariosis caused by *Alternaria infectoria*: three cases in kidney transplant patients. In *Healthcare* (Vol. 1, No. 1, pp. 100-106). MDPI.

Lu, H., Marengo, M.F., Mihu, C.N., Garcia-Manero, G. and Suarez-Almazor, M.E., 2012. Rare case of septic arthritis caused by *Candida krusei*: case report and literature review. *The Journal of Rheumatology*, 39(6), pp.1308-1309.

Lukić-Grlić, A., Mlinarić-Missoni, E., Škarić, I., Važić-Babić, V. and Svetec, I.K., 2011. *Candida utilis* candidaemia in neonatal patients. *Journal of medical microbiology*, 60(6), pp.838-841.

Ma, B., Seymour, J.F., Januszewicz, H. and Slavin, M.A., 2001. Cure of pulmonary *Rhizomucor pusillus* infection in a patient with hairy-cell leukemia: role of liposomal amphotericin B and GM-CSF. *Leukemia & lymphoma*, 42(6), pp.1393-1399.

Magobo, R.E., Corcoran, C., Seetharam, S. and Govender, N.P., 2014. *Candida auris*–associated candidemia, South Africa. *Emerging infectious diseases*, 20(7), p.1250.

MacDonald, H.J., Fong, I.W., Gardiner, G.W. and Soutter, D.I., 1992. Splenic abscess caused by *Blastomyces dermatitidis* in association with peritoneal involvement: case report and review. *Clinical infectious diseases*, 14(1), pp.348-349.

Madigan, T., Fatemi, Y., Theel, E.S., Moodley, A. and Boyce, T.G., 2017. Central nervous system blastomycosis in children: a case report and review of the literature. *The Pediatric Infectious Disease Journal*, 36(7), pp.679-684.

Madariaga, M.G., Tenorio, A. and Proia, L., 2003. *Trichosporon inkin* peritonitis treated with caspofungin. *Journal of clinical microbiology*, 41(12), pp.5827-5829.

Maduri A, Patnayak R, Verma A, Mudgeti N, Kalawat U, Asha T. Subcutaneous infection by *Cladosporium sphaerospermum*-A rare case report. *Indian J Pathol Microbiol* [serial online] 2015 [cited 2023 Nov 30];58:406-7. Available from: <https://www.ijpmonline.org/text.asp?2015/58/3/406/162936>

Mai, H., Champion, L., Ouali, N., Hertig, A., Peraldi, M.N., Glotz, D., Rondeau, E., Costa, M.A., Snanoudj, R., Benoit, G. and Charpentier, B., 2006. *Candida albicans* arteritis transmitted by conservative liquid after renal transplantation: a report of four cases and review of the literature. *Transplantation*, 82(9), pp.1163-1167.

Malik, S., Bajpai, V., Betai, S., Pal, L. and Marak, R.S., 2020. An unusual case of *Microascus* brain abscess in an immunocompetent child and a review of the literature. *Journal of Family Medicine and Primary Care*, 9(2), p.1244.

Malik, R., Capoor, M.R., Vanidassane, I., Gogna, A., Singh, A., Sen, B., Rudramurthy, S.M., Honnavar, P., Gupta, S. and Chakrabarti, A., 2016. Disseminated *Emmonsia pasteuriana* infection in India: a case report and a review. *Mycoses*, 59(2), pp.127-132.

Malin, A.S., Gwanzura, L.K., Robertson, V.J., Musvaire, P., Mason, P.R. and Klein, S., 1995. *Pneumocystis carinii* pneumonia in Zimbabwe. *The Lancet*, 346(8985), pp.1258-1261.

Mangaraj, S., Sethy, G., Patro, M.K. and Padhi, S., 2014. A rare case of subcutaneous mucormycosis due to *Syncephalastrum racemosum*: Case report and review of literature. *Indian J Med Microbiol*, 32(4), p.448.

Mangiaterra, M., Giusiano, G., Smilasky, G., Zamar, L., Amado, G. and Vicentán, C., 2001. Keratomycosis caused by *Cylindrocarpon lichenicola*. *Sabouraudia*, 39(1), pp.143-145.

Mansour, A. and Jordan, K., 2014. Disseminated *Cladophialophora bantiana* disease in a patient with prediabetes. *Case Reports*, 2014, p.bcr2014206426.

Mao, Y., Li, X., Lou, H., Shang, X., Mai, Y., Yang, L., Peng, F. and Fu, X., 2021. Detection of *Coccidioides posadasii* in a patient with meningitis using metagenomic next-generation sequencing: a case report. *BMC Infectious Diseases*, 21(1), pp.1-5.

Maphanga, T.G., Birkhead, M., Muñoz, J.F., Allam, M., Zulu, T.G., Cuomo, C.A., Schwartz, I.S., Ismail, A., Naicker, S.D., Mpembe, R.S. and Corcoran, C., 2020. Human blastomycosis in South Africa caused by *Blastomyces percursus* and *Blastomyces emzantsi* sp. nov., 1967 to 2014. *Journal of clinical microbiology*, 58(3), pp.10-1128.

Marcio, N., Tiyyomi, A., Gloria, B., Fernanda, S., Revankar, S.G., Brian, L.W., Sutton, D.A. and Patterson, T.F., 2002. Nosocomial outbreak of *Exophiala jeanselmei* fungemia associated with contamination of hospital water. *Clinical infectious diseases*, 34(11), pp.1475-1480.

Marques-da-Silva, S.H., Rodrigues, A.M., de Hoog, G.S., Silveira-Gomes, F. and de Camargo, Z.P., 2012. Case report: occurrence of *Paracoccidioides lutzii* in the Amazon region: description of two cases. *The American journal of tropical medicine and hygiene*, 87(4), p.710.

Marques, A.R., Kwon-Chung, K.J., Holland, S.M., Turner, M.L. and Gallin, J.I., 1995. Suppurative cutaneous granulomata caused by *Microascus cinereus* in a patient with chronic granulomatous disease. *Clinical infectious diseases*, 20(1), pp.110-114.

Martins Castro, L.G., da Silva Lacaz, C., Guarro, J., Gené, J., Heins-Vaccari, E.M., de Freitas Leite, R.S., Hernández Arriagada, G.L., Ozaki Reguera, M.M., Ito, E.M., Valente, N.Y.S. and Spina Nunes, R., 2001. Phaeohyphomycotic cyst caused by *Colletotrichum crassipes*. *Journal of Clinical Microbiology*, 39(6), pp.2321-2324.

Maslen, M.M., 2000. Human cases of cattle ringworm due to *Trichophyton verrucosum* in Victoria, Australia. *Australasian journal of dermatology*, 41(2), pp.90-94.

Mathur, P., Hasan, F., Singh, P.K., Malhotra, R., Walia, K. and Chowdhary, A., 2018. Five-year profile of candidaemia at an Indian trauma centre: high rates of *Candida auris* blood stream infections. *Mycoses*, 61(9), pp.674-680.

Matsuzaki, T., Kasai, H., Ikeda, H., Tajiri, Y., Suzuki, K., Watanabe, A., Kamei, K. and Urushibara, T., 2021. Voriconazole treatment of pulmonary mycosis caused by *Chrysosporium zonatum* after treatment for pulmonary tuberculosis. *Respirology Case Reports*, 9(6), p.e00763.

Marcus, L., Vismer, H.F., Van der Hoven, H.J., Gove, E. and Meewes, P., 1992. Mycotic keratitis caused by *Curvularia brachyspora* (Boedjin). *Mycopathologia*, 119(1), pp.29-33.

Markey, R.J., Staat, M.A., Gerrety, M.J.T. and Lucky, A.W., 2003. Tinea capitis due to *Trichophyton soudanense* in Cincinnati, Ohio, in internationally adopted children from Liberia. *Pediatric dermatology*, 20(5), pp.408-410.

Marques, D.P., Carvalho, J., Rocha, S. and Domingos, R., 2019. A case of pulmonary mycetoma caused by *Paecilomyces variotii*. *European Journal of Case Reports in Internal Medicine*, 6(2).

Marques de Macedo, P., Sztajn bok, D.C.N., Camargo, Z.P., Rodrigues, A.M., Lopes-Bezerra, L.M., Bernardes-Engemann, A.R. and Orofino-Costa, R., 2015. Dacryocystitis due to *Sporothrix brasiliensis*: a case report of a successful clinical and serological outcome with low-dose potassium iodide treatment and oculoplastic surgery. *British Journal of Dermatology*, 172(4), pp.1116-1119.

Martínez-Herrera, E., Frías-De-León, M.G., Julián-Castrejón, A., Cruz-Benítez, L., Xicohtencatl-Cortes, J. and Hernández-Castro, R., 2020. Rhino-orbital mucormycosis due to *Apophysomyces ossiformis* in a patient with diabetes mellitus: a case report. *BMC Infectious Diseases*, 20(1), pp.1-4.

Marty, F.M., Barouch, D.H., Coakley, E.P. and Baden, L.R., 2003. Disseminated trichosporonosis caused by *Trichosporon loubieri*. *Journal of clinical microbiology*, 41(11), pp.5317-5320.

Maruyama, R., Katoh, T. and Nishioka, K., 1999. A Case of Unna-Thost Disease Accompanied by *Epidermophyton floccosum* Infection. *The Journal of Dermatology*, 26(1), pp.63-66.

Mayser, P., Nilles, M. and De Hoog, G.S., 2002. Case report. Cutaneous phaeohyphomycosis due to *Alternaria alternata*. *Mycoses*, 45(7-8), pp.338-340.

Medrano, D. J., R. S. Brilhante, A. Cordeiro Rde, M. F. Rocha, S. H. Rabenhorst, and J. J. Sidrim. 2006. Candidemia in a Brazilian hospital: the importance of *Candida parapsilosis*. *Rev. Inst. Med. Trop. Sao Paulo* 48:17-20.

Mei, J.I., Xue-hua, S.H.E.N., Jing-wen, T.A.N., Zhi-qin, G.A.O. and Lian-juan, Y.A.N.G., 2020. The first case of *Tinea Nigra* on wrist caused by *Hortaea werneckii* in Chinese mainland and literature review. *Chinese Journal of Mycology*, 15(4), p.193.

Meis, J.F., Kullberg, B.J., Pruszczyński, M. and Veth, R.P., 1994. Severe osteomyelitis due to the zygomycete *Apophysomyces elegans*. *Journal of Clinical Microbiology*, 32(12), pp.3078-3081.

Mehta, V., Mohanty, A., Meena, S., Rahul, J.S., Uttam Kumar, N., Chattopadhyay, D., Bakliwal, A., Choudhary, R. and Gupta, P., 2020. *Wickerhamomyces anomalous*: a rare cause of fungemia causing febrile neutropenia in acute lymphoblastic leukemia. *Case reports in infectious diseases*, 2020.

Menon, A.A., Berg, D.D., Brea, E.J., Deutsch, A.J., Kidia, K.K., Thurber, E.G., Polsky, S.B., Yeh, T., Duskin, J.A., Holliday, A.M. and Gay, E.B., 2020. A case of COVID-19 and *Pneumocystis jirovecii* coinfection. *American journal of respiratory and critical care medicine*, 202(1), pp.136-138.

Mendiratta, V., Karmakar, S., Jain, A. and Jabeen, M., 2012. Severe cutaneous zygomycosis due to *Basidiobolus ranarum* in a young infant. *Pediatric Dermatology*, 29(1), pp.121-123.

Mendoza, M.A., Anderson, A., Morris, M.I., Lekakis, L., Simkins, J., Prado, C.E., Martinez, O.V., Komanduri, K.V. and Camargo, J.F., 2020. Successful treatment of invasive fungal infection due to highly resistant *Aspergillus calidoustus* in an allogeneic hematopoietic cell transplant recipient. *Mycopathologia*, 185(2), pp.399-403.

Mercier, V., Desnos-Ollivier, M., Lamy, A., Mahul, M. and Sasso, M., 2021. *Kazachstania slooffiae*: an unexpected journey to a human pleural sample. *Journal of Medical Mycology*, 31(2), p.101109.

Milan, E.P., Silva-Rocha, W.P., de Almeida, J.J.S., Fernandes, T.U.G., de Araújo Prudente, A.L., de Azevedo, M.F., Francisco, E.C., de Azevedo Melo, A.S., Colombo, A.L. and Chaves, G.M., 2018. *Trichosporon inkin* meningitis in Northeast Brazil: first case report and review of the literature. *BMC infectious diseases*, 18(1), pp.1-8.

Miller, D.J. and Mejicano, G.C., 2001. Vertebral osteomyelitis due to *Candida* species: case report and literature review. *Clinical infectious diseases*, 33(4), pp.523-530.

Minces, L.R., Ho, K.S., Veldkamp, P.J. and Clancy, C.J., 2009. *Candida rugosa*: a distinctive emerging cause of candidaemia. A case report and review of the literature. *Scandinavian journal of infectious diseases*, 41(11-12), pp.892-897.

Minta, D.K., Dembélé, M., Lorre, G., Diallo, D.A., Traoré, H.A. and Chabasse, D., 2005. African histoplasmosis (*Histoplasma capsulatum* var. *duboisii*): a case report from Mali. *Cahiers d'études et de recherches francophones/Santé*, 15(3), pp.195-199.

Miossec, C., Morio, F., Lepoivre, T., Le Pape, P., Garcia-Hermoso, D., Gay-Andrieu, F., Haloun, A., Treilhaud, M., Leclair, F. and Miegerville, M., 2011. Fatal invasive infection with fungemia due to *Microascus cirrosus* after heart and lung transplantation in a patient with cystic fibrosis. *Journal of clinical microbiology*, 49(7), pp.2743-2747.

Mise, N., Ono, Y., Kurita, N., Sai, K., Nishi, T., Tagawa, H. and Sugimoto, T., 2008. *Aureobasidium pullulans* peritonitis: case report and review of the literature. *Peritoneal Dialysis International*, 28(6), pp.679-681.

Mitra, A., Savant, V., Aralikatti, A., Dean, S. and Shah, S., 2009. The use of voriconazole in the treatment of cylindrocarpon keratomycosis. *Cornea*, 28(2), pp.217-218.

Miyakis, S., Velegraki, A., Delikou, S., Parcharidou, A., Papadakis, V., Kitra, V., Papadatos, I. and Polychronopoulou, S., 2006. Invasive *Acremonium strictum* infection in a bone marrow transplant recipient. *The Pediatric infectious disease journal*, 25(3), pp.273-275.

Mlinarić-Missoni, E., Hatvani, L., Kocsube, S., Vágvölgyi, C., Škarić, I. and Lukić-Grlić, A., 2015. *Cyberlindnera fabianii* in the neonatal and paediatric intensive care unit. *JMM Case Reports*, 2(3), p.e000032.

Mohsin, J., Hagen, F., Al-Balushi, Z.A., de Hoog, G.S., Chowdhary, A., Meis, J.F. and Al-Hatmi, A.M., 2017. The first cases of *Candida auris* candidaemia in Oman. *Mycoses*, 60(9), pp.569-575.

Moin, S., Farooqi, J., Rattani, S., Nasir, N., Zaka, S. and Jabeen, K., 2021. *C. auris* and non-*C. auris* candidemia in hospitalized adult and pediatric COVID-19 patients; single center data from Pakistan. *Medical Mycology*, 59(12), pp.1238-1242.

Moniot, M., Lavergne, R.A., Morel, T., Guieze, R., Morio, F., Poirier, P. and Nourrisson, C., 2020. *Hormographiella aspergillata*: an emerging basidiomycete in the clinical setting? A case report and literature review. *BMC Infectious Diseases*, 20, pp.1-7.

Montejo, M., Muniz, M.L., Zarraga, S., Aguirrebengoa, K., Amenabar, J.J., López-Soria, L. and Gonzalez, R., 2002. Infection due to *Scedosporium apiospermum* in renal transplant recipients: a report of two cases and literature review of central nervous system and cutaneous infections by *Pseudallescheria boydii*/Sc. *apiospermum*. *Mycoses*, 45(9-10), pp.418-427.

Mohammadi, R., Mohammadi, A., Ashtari, F., Khorvash, F., Hakamifard, A., Vaezi, A., Javidnia, J., Meis, J.F. and Badali, H., 2018. Cerebral phaeohyphomycosis due to *Rhinocladiella mackenziei* in Persian Gulf region: a case and review. *Mycoses*, 61(4), pp.261-265.

Motswaledi, H.M., Monyemangene, F.M., Maloba, B.R. and Nemutavhanani, D.L., 2012. Blastomycosis: a case report and review of the literature. *International Journal of Dermatology*, 51(9), pp.1090-1093.

Mouronte-Roibás, C., Leiro-Fernández, V., Botana-Rial, M., Ramos-Hernández, C., Lago-Preciado, G., Fiaño-Valverde, C. and Fernández-Villar, A., 2016. *Lichtheimia ramosa*: a fatal case of mucormycosis. *Canadian respiratory journal*, 2016.

Mhmoud NA, Santona A, Fiamma M, Siddig EE, Deligios M, Bakhiet SM, et al. (2019) *Chaetomium atrobrunneum* causing human eumycetoma: The first report. *PLoS Negl Trop Dis* 13(5): e0007276. <https://doi.org/10.1371/journal.pntd.0007276>

Mukherjee, B. and Kundu, D., 2018. Necrotizing fungal infection due to *Saksenaea erythrospora*: A case report and review of literature. *Indian Journal of Ophthalmology*, 66(10), p.1513.

Mulè, A., Rossini, F., Sollima, A., Lenzi, A., Fumarola, B., Amadasi, S., Chiari, E., Lorenzotti, S., Saccani, B., Van Hauwermeiren, E. and Lanza, P., 2023. *Trichosporon asahii* infective endocarditis of prosthetic valve: A case report and literature review. *Antibiotics*, 12(7), p.1181.

Murray, C.K., Beckius, M.L. and McAllister, C.K., 2003. *Fusarium proliferatum* superficial suppurative thrombophlebitis. *Military medicine*, 168(5), pp.426-427.

Myoken, Y., Sugata, T., Fujita, Y., Asaoku, H., Fujihara, M. and Mikami, Y., 2002. Fatal necrotizing stomatitis due to *Trichoderma longibrachiatum* in a neutropenic patient with malignant lymphoma: a case report. *International journal of oral and maxillofacial surgery*, 31(6), pp.688-691.

Myoken, Y., Sugata, T., Fujita, Y., Kyo, T.I., Fujihara, M., Kohara, T., Katsu, M. and Mikami, Y., 2003. Molecular epidemiology of invasive stomatitis due to *Aspergillus flavus* in patients with acute leukemia. *Journal of oral pathology & medicine*, 32(4), pp.215-218.

Naidu, J., Singh, S.M. and Pouranik, M., 1991. Onychomycosis caused by *Scopulariopsis brumptii*. *Mycopathologia*, 113(3), pp.159-164.

Najafzadeh, M.J., Sun, J., Vicente, V., Xi, L., van Den Ende, A.G. and De Hoog, G.S., 2010. *Fonsecaea nubica* sp. nov, a new agent of human chromoblastomycosis revealed using molecular data. *Sabouraudia*, 48(6), pp.800-806.

Nakagawa, T., Nakashima, K., Takaiwa, T. and Negayama, K., 2000. *Trichosporon cutaneum* (*Trichosporon asahii*) infection mimicking hand eczema in a patient with leukemia. *Journal of the American Academy of Dermatology*, 42(5), pp.929-931.

Nakai, K., Kanda, Y., Mineishi, S., Hori, A., Chizuka, A., Niiya, H., Tanimoto, T., Ohnishi, M., Kami, M., Makimoto, A. and Tanosaki, R., 2002. Primary cutaneous aspergillosis caused by *Aspergillus ustus* following reduced-intensity stem cell transplantation. *Annals of hematology*, 81(10), pp.593-596.

Nakamura, T. and Takahashi, H., 2006. Epidemiological study of *Candida* infections in blood: susceptibilities of *Candida* spp. to antifungal agents, and clinical features associated with the candidemia. *Journal of infection and chemotherapy*, 12(3), pp.132-138.

Nakamura, Y., Kano, R., Nakamura, E., Saito, K., Watanabe, S. and Hasegawa, A., 2002. Case report. First report on human ringworm caused by *Arthroderma benhamiae* in Japan transmitted from a rabbit. *Mycoses*, 45(3-4), pp.129-131.

Narula, H., Meena, S., Jha, S., Kaistha, N., Pathania, M. and Gupta, P., 2020. *Curvularia lunata* causing orbital cellulitis in a diabetic patient: An old fungus in a new territory. *Current Medical Mycology*, 6(1), p.51.

Nayak DR, Balakrishnan R, Nainani S, Siddique S. *Paecilomyces* fungus infection of the paranasal sinuses. *Int J Pediatr Otorhinolaryngol* 2000; 52: 183–187.

Nascimento, E., Bonifácio da Silva, M.E.N., Martinez, R. and von Zeska Kress, M.R., 2014. Primary cutaneous cryptococcosis in an immunocompetent patient due to *Cryptococcus gattii* molecular type VGI in Brazil: a case report and review of literature. *Mycoses*, 57(7), pp.442-447.

Naseri, A., Fata, A. and Khosravi, A.R., 2012. The first case of *Microsporum persicolor* infection in Iran.

Navaratnam, J., Bærland TP, Solberg EL, Hermansen NO, Andersen CT, Eide N. 2022. A Case Report of *Phialemonium Curvatum* Endophthalmitis. *J Ophthalmol Adv Res*, 3(1), pp.1-6.

Nazir, Z., Hasan, R., Pervaiz, S., Alam, M. and Moazam, F., 1997. Invasive retroperitoneal infection due to *Basidiobolus ranarum* with response to potassium iodide—case report and review of the literature. *Annals of tropical paediatrics*, 17(2), pp.161-164.

Neblett Fanfair, R., Benedict, K., Bos, J., Bennett, S.D., Lo, Y.C., Adebajo, T., Etienne, K., Deak, E., Derado, G., Shieh, W.J. and Drew, C., 2012. Necrotizing cutaneous mucormycosis after a tornado in Joplin, Missouri, in 2011. *New England journal of medicine*, 367(23), pp.2214-2225.

Neelaveni, V., Tupaki-Sreepurna, A., Thanneru, V. and Kindo, A.J., 2017. *Lichtheimia ramosa* isolated from a young patient from an infected wound after a road traffic accident. *Journal of The Academy of Clinical Microbiologists*, 19(1), p.59.

Negrón, R., Helou, S.H., Petri, N., Robles, A.M., Arechavala, A. and Bianchi, M.H., 2004. Case study: posaconazole treatment of disseminated phaeohyphomycosis due to *Exophiala spinifera*. *Clinical Infectious Diseases*, 38(3), pp.e15-e20.

Neji, S., Makni, F., Sellami, H., Cheikhrouhou, F., Sellami, A. and Ayadi, A., 2009. First case of *Microsporum ferrugineum* from Tunisia. *Mycopathologia*, 167(6), pp.351-353.

Nenoff, P., Verma, S.B., Vasani, R., Burmester, A., Hipler, U.C., Wittig, F., Krüger, C., Nenoff, K., Wiegand, C., Saraswat, A. and Madhu, R., 2019. The current Indian epidemic of superficial dermatophytosis due to *Trichophyton mentagrophytes*—A molecular study. *Mycoses*, 62(4), pp.336-356.

Ng, T.T., Campbell, C.K., Rothera, M., Houghton, J.B., Hughes, D. and Denning, D.W., 1994. Successful treatment of sinusitis caused by *Cunninghamella bertholletiae*. *Clinical infectious diseases*, 19(2), pp.313-316.

Nguyen, V.Q. and Penn, R.L., 1987. *Candida krusei* infectious arthritis: a rare complication of neutropenia. *The American journal of medicine*, 83(5), pp.963-965.

Nguyen, D.K., Davis, C.M., Chinen, J., Vallejo, J.G. and Noroski, L.M., 2009. Basidiomycetous *Inonotus* (*Phellinus*) *tropicalis* osteomyelitis in pediatric and adult X-linked chronic granulomatous disease. *Journal of Allergy and Clinical Immunology*, 123(2), p.S13.



Nir-Paz, R., Elinav, H., Pierard, G.E., Walker, D., Maly, A., Shapiro, M., Barton, R.C. and Polacheck, I., 2003. Deep infection by *Trichophyton rubrum* in an immunocompromised patient. *Journal of clinical microbiology*, 41(11), pp.5298-5301.

Noguchi, H., Sakae, H., Hattori, M. and Hiruma, M., 2010. Review of Two Japanese Cases with *Tinea Faciei* Identified by Molecular Biological Techniques as *Arthroderma vanbreuseghemii*. *Japanese Journal of Medical Mycology*, 51(4).

Nogueira, S.A., Guedes, A.L., Wanke, B., Capella, S., Rodrigues, K., Abreu, T.F., Morais, J.C. and Lambert, J.S., 2001. Osteomyelitis caused by *Paracoccidioides brasiliensis* in a child from the metropolitan area of Rio de Janeiro. *Journal of tropical pediatrics*, 47(5), pp.311-315.

Nulens, E., De Laere, E., Vandeveld, H., Hilbrands, L.B., Rijs, A.J., Melchers, W.J. and Verweij, P.E., 2006. *Alternaria* infectoria phaeohyphomycosis in a renal transplant patient. *Sabouraudia*, 44(4), pp.379-382.

Ogawa, H., Fujimura, M., Amaike, S., Matsumoto, Y., Kitagawa, M. and Matsuda, T., 1997. Eosinophilic pneumonia caused by *Alternaria alternata*. *Allergy*, 52(10), pp.1005-1008.

Ogawa, H., Fujimura, M., Takeuchi, Y., Makimura, K. and Satoh, K., 2012. The definitive diagnostic process and successful treatment for ABPM caused by *Schizophyllum commune*: a report of two cases. *Allergology International*, 61(1), pp.163-169.

O'Gorman, S.M., Britton, D. and Collins, P., 2015. An uncommon dermatophyte infection: two cases of cutaneous infection with *Trichophyton verrucosum*. *Clinical and Experimental Dermatology*, 40(4), pp.395-398.

Oh, T.H., Shin, S.U., Kim, S.S., Kim, S.E., Kim, U.J., Kang, S.J., Jang, H.C., Jung, S.I., Shin, J.H. and Park, K.H., 2020. Prosthetic valve endocarditis by *Trichosporon mucoides*: A case report and review of literature. *Medicine*, 99(41).

Ohira, S., Isoda, K., Hamanaka, H., Takahashi, K., Nishimoto, K. and Mizutani, H., 2002. Case report. Phaeohyphomycosis caused by *Phialophora verrucosa* developed in a patient with non-HIV acquired immunodeficiency syndrome. *Mycoses*, 45(1-2), pp.50-54.

Okhuysen, P.C., Rex, J.H., Kapusta, M. and Fife, C., 1994. Successful treatment of extensive posttraumatic soft-tissue and renal infections due to *Apophysomyces elegans*. *Clinical infectious diseases*, 19(2), pp.329-331.

Olenski, M., Halliday, C., Gullifer, J., Martinez, E., Crowe, A., Sheorey, H. and Darby, J., 2021. A Case of Trauma-Induced *Falciformispora lignatilis* Eumycetoma in a Renal Transplant Recipient. *Tropical Medicine and Infectious Disease*, 6(3), p.144.

Oliveri, S., Cammarata, E., Augello, G. *et al.* *Rhizopus arrhizus* in Italy as the causative agent of primary cerebral zygomycosis in a drug addict. *Eur J Epidemiol* 4, 284–288 (1988). <https://doi.org/10.1007/BF00148911>

Olorunnipa, O., Zhang, A.Y. and Curtin, C.M., 2010. Invasive aspergillosis of the hand caused by *Aspergillus ustus*: a case report. *Hand*, 5(1), pp.102-105.

O'Quinn, R.P., Hoffmann, J.L. and Boyd, A.S., 2001. *Colletotrichum* species as emerging opportunistic fungal pathogens: a report of 3 cases of phaeohyphomycosis and review. *Journal of the American Academy of Dermatology*, 45(1), pp.56-61.

Oremosu, J., Ung, L., Chodosh, J., Cañete-Gibas, C., Wiederhold, N.P., Davies, E.C. and Bispo, P.J., 2023. Fungal keratitis caused by *Coniochaeta mutabilis*—A case report. *Journal of Medical Mycology*, 33(2), p.101384.

Orth, B., Frei, R., Itin, P.H., Rinaldi, M.G., Speck, B., Gratwohl, A. and Widmer, A.F., 1996. Outbreak of invasive mycoses caused by *Paecilomyces lilacinus* from a contaminated skin lotion. *Annals of internal medicine*, 125(10), pp.799-806.

- Otag, F., Yarpuzlu, M., Gulbudak, H., ARSLANKÖYLÜ, A., Fouad, A. and Emekdaş, G., 2015. Candida Pelliculosa Fungemia cases in pediatric intensive care unit. *Journal of Pediatric Infection*, 9(2).
- Ozer, B., Kalaci, A., Duran, N., Dogramaci, Y. and Yanat, A.N., 2009. Cutaneous infection caused by *Aspergillus terreus*. *Journal of medical microbiology*, 58(7), pp.968-970.
- Paccoud, O., Vignier, N., Boui, M., Migaud, M., Vironneau, P., Kania, R., Méchaï, F., Brun, S., Alanio, A., Tauziède-Espariat, A. and Adle-Biasette, H., 2022. Invasive Rhinosinusitis Caused by *Alternaria infectoria* in a Patient with Autosomal Recessive CARD9 Deficiency and a Review of the Literature. *Journal of Fungi*, 8(5), p.446.
- Padhi, S., Dash, M., Pattanaik, S. and Sahu, S., 2014. Fungemia due to *Trichosporon mucoides* in a diabetes mellitus patient: a rare case report. *Indian J Med Microbiol*, 32(1), pp.72-4.
- Padhye, A.A., Detweiler, J.G., Frumkin, A., Bulmer, G.S., Ajello, L. and McGinnis, M.R., 1989. Tinea capitis caused by *Microsporum praecox* in a patient with sickle cell anaemia. *Journal of Medical and Veterinary Mycology*, 27(5), pp.313-317.
- Padhye, A.A., Davis, M.S., Baer, D., Reddick, A., Sinha, K.K. and Ott, J., 1998. Phaeohyphomycosis caused by *Phaeoacremonium inflatipes*. *Journal of Clinical Microbiology*, 36(9), pp.2763-2765.
- Padhye, A.A., Verghese, S., Ravichandran, P., Balamurugan, G., Hall, L., Padmaja, P. and Fernandez, M.C., 2003. *Trichosporon loubieri* infection in a patient with adult polycystic kidney disease. *Journal of clinical microbiology*, 41(1), pp.479-482.
- Padmaja, I.J., Ramani, T.V. and Kalyani, S., 2006. Case Report-Cutaneous zygomycosis-Necrotising fascitis due to *Saksenaea vasiformis*. *Indian Journal of Medical Microbiology*, 24(1), pp.58-60.
- Pakshir, K. and Hashemi, J., 2006. Dermatophytosis in Karaj, Iran. *Indian journal of dermatology*, 51(4), p.262.
- Palmore, T.N., Shea, Y.R., Childs, R.W., Sherry, R.M. and Walsh, T.J., 2010. *Fusarium proliferatum* soft tissue infection at the site of a puncture by a plant: recovery, isolation, and direct molecular identification. *Journal of clinical microbiology*, 48(1), pp.338-342.
- Pariseau, B., Lucarelli, M.J. and Appen, R.E., 2007. Unilateral blastomyces dermatitidis optic neuropathy: Case report and systematic literature review. *Ophthalmology*, 114(11), pp.2090-2094.
- Parra-Giraldo, C.M., Valderrama, S.L., Cortes-Fraile, G., Garzón, J.R., Ariza, B.E., Morio, F., Linares-Linares, M.Y., Ceballos-Garzón, A., de la Hoz, A., Hernandez, C. and Alvarez-Moreno, C., 2018. First report of sporadic cases of *Candida auris* in Colombia. *International Journal of Infectious Diseases*, 69, pp.63-67.
- Paccoud, O., Guery, R., Poirée, S., Jouvion, G., Bougnoux, M.E., Catherinot, E., Hermine, O., Lortholary, O. and Lanternier, F., 2019. *Aspergillus felis* in patient with chronic granulomatous disease. *Emerging Infectious Diseases*, 25(12), p.2319.
- Padhye, A.A., Helwig, W.B., Warren, N.G., Ajello, L., Chandler, F.W. and McGinnis, M.R., 1988. Subcutaneous phaeohyphomycosis caused by *Xylohypha emmonsii*. *Journal of clinical microbiology*, 26(4), pp.709-712.
- Pan, J., Tsui, C., Li, M., Xiao, K., de Hoog, G.S., Verweij, P.E., Cao, Y., Lu, H. and Jiang, Y., 2020. First case of rhinocerebral mucormycosis caused by *Lichtheimia ornata*, with a review of *Lichtheimia* infections. *Mycopathologia*, 185(3), pp.555-567.
- Paniz-Mondolfi, A.E., Agemy, S., Cañete-Gibas, C., Gitman, M.R., Iacob, C.E., Necula, I., Wang, C.Y., Noguera, L.A.D., Sanders, C., Wiederhold, N.P. and Sordillo, E.M., 2021. First report of human infection caused by *Colletotrichum chlorophyti* occurring in a post-corneal transplant patient with endophthalmitis. *Medical Mycology Case Reports*, 32, pp.73-76.
- Pan, W., Liao, W., Hagen, F., Theelen, B., Shi, W., Meis, J.F. and Boekhout, T., 2012. Meningitis caused by *Filobasidium uniguttulatum*: case report and overview of the literature. *Mycoses*, 55(2), pp.105-109.

Pan, M., Huang, J., Qiu, Y., Zeng, W., Li, Z., Tang, S., Wei, X. and Zhang, J., 2020, June. Assessment of *Talaromyces marneffe*i infection of the intestine in three patients and a systematic review of case reports. In *Open Forum Infectious Diseases* (Vol. 7, No. 6, p. ofaa128). US: Oxford University Press.

Pelaez, T., Alvarez-Perez, S., Mellado, E., Serrano, D., Valerio, M., Blanco, J.L., Garcia, M.E., Munoz, P., Cuenca-Estrella, M. and Bouza, E., 2013. Invasive aspergillosis caused by cryptic *Aspergillus* species: a report of two consecutive episodes in a patient with leukaemia. *Journal of medical microbiology*, 62(3), pp.474-478.

Parente, J.N.T., Talhari, C., Ginter-Hanselmayer, G., Schettini, A.P.M., da Costa Eiras, J., de Souza, J.V.B., Tavares, R., Buzina, W., Brunasso, A.M.G. and Massone, C., 2011. Subcutaneous phaeohyphomycosis in immunocompetent patients: two new cases caused by *Exophiala jeanselmei* and *Cladophialophora carrionii*. *Mycoses*, 54(3), pp.265-269.

Park, S.G., Oh, S.H., Suh, S.B., Lee, K.H. and Chung, K.Y., 2005. A case of chromoblastomycosis with an unusual clinical manifestation caused by *Phialophora verrucosa* on an unexposed area: treatment with a combination of amphotericin B and 5-flucytosine. *British Journal of Dermatology*, 152(3), pp.560-564.

PARK, Y.W., CHOI, B.R., SHIN, J.P. and CHO, H.T., 2006. A Case of *Chrysosporium Parvum* Endophthalmitis. *Journal of the Korean Ophthalmological Society*, pp.858-862.

Parsi, K., Itgampalli, R.K., Vittal, R. and Kumar, A., 2013. Perineural spread of rhino-orbitocerebral mucormycosis caused by *Apophysomyces elegans*. *Annals of Indian Academy of Neurology*, 16(3), p.414.

Parkes-Smith, J., Bauer, M.J., Bergh, H., Eidan, A., Forde, B.M., Hilton, J., Kidd, T.J., Schmidt, C., Stewart, A.G. and Harris, P.N., 2022. Case report: a fatal case of *Aspergillus felis* infection in an immunocompetent host. *Access Microbiology*, 4(11), p.000453.

Parry, M.F., Grant, B., Yukna, M., Adler-Klein, D., McLeod, G.X., Taddonio, R. and Rosenstein, C., 2001. *Candida* osteomyelitis and diskitis after spinal surgery: an outbreak that implicates artificial nail use. *Clinical Infectious Diseases*, 32(3), pp.352-357.

Pasquetti, M., Min, A.R.M., Scacchetti, S., Dogliero, A. and Peano, A., 2017. Infection by *Microsporum canis* in paediatric patients: A veterinary perspective. *Veterinary sciences*, 4(3), p.46.

Passos, X.S., Sales, W.S., Maciel, P.J., Costa, C.R., Ferreira, D.M. and do Silva, M.R.R., 2006. Nosocomial invasive infection caused by *Cunninghamella bertholletiae*: case report. *Mycopathologia*, 161, pp.33-35.

Pastor, F.J. and Guarro, J., 2006. Clinical manifestations, treatment and outcome of *Paecilomyces lilacinus* infections. *Clinical Microbiology and Infection*, 12(10), pp.948-960.

Pastorino, A.C., Menezes, U.P.D., Marques, H.H.D.S., Vallada, M.G., Cappellozi, V.L., Carnide, E.M.G. and Jacob, C.M.A., 2005. *Acremonium kiliense* infection in a child with chronic granulomatous disease. *Brazilian Journal of Infectious Diseases*, 9, pp.529-534.

Pavlovic, M.D. and Bulajic, N., 2006. Great toenail onychomycosis caused by *Syncephalastrum racemosum*. *Dermatology online journal*, 12(1).

Peçanha, P.M., Bahiense, I.C., Kruschewsky, W.L.L., Biasutti, C., Júnior, C.U.G.F., Pinheiro, B.G., Maifrede, S.B., de Camargo, Z.P., Rodrigues, A.M., Grão-Velloso, T.R. and Falqueto, A., 2021. Paracoccidioidomycosis due to *Paracoccidioides brasiliensis* S1 associated with acquired immunodeficiency syndrome: A case report. *Revista Iberoamericana de Micología*, 38(1), pp.5-8.

Peltroche-Llacsahuanga, H., Manegold, E., Kroll, G. and Haase, G., 2000. Case report. Pathohistological findings in a clinical case of disseminated infection with *Fusarium oxysporum*. *Mycoses*, 43(9-10), pp.367-372.

Pemán, J., Jarque, I., Bosch, M., Cantón, E., Salavert, M., de Llanos, R. and Molina, A., 2006. Spondylodiscitis caused by *Candida krusei*: case report and susceptibility patterns. *Journal of clinical microbiology*, 44(5), pp.1912-1914.

Pendones-Ulerio, J., Martins-Lopes, M., García-Garrote, F., Hernández-Calvo, P., Yuste-Chaves, M. and Gutiérrez-Zufiaurre, M.N., 2023. Ringworm by *Nannizzia nana*: Clinical case and literature review. *Enfermedades infecciosas y microbiología clínica (English ed.)*.

Perdomo, H., Sutton, D.A., García, D., Fothergill, A.W., Cano, J., Gené, J., Summerbell, R.C., Rinaldi, M.G. and Guarro, J., 2011. Spectrum of clinically relevant *Acremonium* species in the United States. *Journal of Clinical Microbiology*, 49(1), pp.243-256.

Pereiro Jr, M., Abalde, M.T., Zulaica, A., Caeiro, J.L., Flórez, A., Peteiro, C. and Toribio, J., 2001. Chronic infection due to *Fusarium oxysporum* mimicking lupus vulgaris: case report and review of cutaneous involvement in fusariosis. *Acta dermato-venereologica*, 81(1).

Person, A.K., Chudgar, S.M., Norton, B.L., Tong, B.C. and Stout, J.E., 2010. *Aspergillus niger*: an unusual cause of invasive pulmonary aspergillosis. *Journal of medical microbiology*, 59(7), pp.834-838.

Perz M. *Fusarium nivale* as a cause of corneal mycosis. *Klin Oczna* 1966; 36: 609–612.

Petrikkos, G., Skiada, A., Sabatakou, H., Antoniadou, A., Dosios, T. and Giamarellou, H., 2001. Case Report. Successful treatment of two cases of post-surgical sternal osteomyelitis, due to *Candida krusei* and *Candida albicans*, respectively, with high doses of triazoles (fluconazole, itraconazole). *Mycoses*, 44(9-10), pp.422-425.

Piepenbring, M., Cáceres Mendez, O.A., Espino Espinoza, A.A., Kirschner, R. and Schöfer, H., 2007. Chromoblastomycosis caused by *Chaetomium funicola*: a case report from Western Panama. *British Journal of Dermatology*, 157(5), pp.1025-1029.

Piepenbring, M., Cáceres Mendez, O.A., Espino Espinoza, A.A., Kirschner, R. and Schöfer, H., 2007. Chromoblastomycosis caused by *Chaetomium funicola*: a case report from Western Panama. *British Journal of Dermatology*, 157(5), pp.1025-1029.

Pierce, P.F., Wood, M.B., Roberts, G.D., Fitzgerald Jr, R.H., Robertson, C. and Edson, R.S., 1987. *Saksenaia vasiformis* osteomyelitis. *Journal of Clinical Microbiology*, 25(5), pp.933-935.

Pillay, T., Pillay, D.G. and Bramdev, A., 1997. Disseminated histoplasmosis in a human immunodeficiency virus-infected African child. *The Pediatric infectious disease journal*, 16(4), pp.417-418.

Pimentel, J.D., Mahadevan, K., Woodgyer, A., Sigler, L., Gibas, C., Harris, O.C., Lupino, M. and Athan, E., 2005. Peritonitis due to *Curvularia inaequalis* in an elderly patient undergoing peritoneal dialysis and a review of six cases of peritonitis associated with other *Curvularia* spp. *Journal of clinical microbiology*, 43(8), pp.4288-4292.

Pimentel, J.D., Dreyer, G. and Lum, G.D., 2006. Peritonitis due to *Cunninghamella bertholletiae* in a patient undergoing continuous ambulatory peritoneal dialysis. *Journal of medical microbiology*, 55(1), pp.115-118.

Pinel, C., Fricker-Hidalgo, H., Lebeau, B., Garban, F., Hamidfar, R., Ambroise-Thomas, P. and Grillot, R., 2003. Detection of circulating *Aspergillus fumigatus* galactomannan: value and limits of the Platelia test for diagnosing invasive aspergillosis. *Journal of clinical microbiology*, 41(5), pp.2184-2186.

Pintor, E., Martin, M., Garcia, P. and Gonzalez, M., 2001. Endophthalmitis due to *Paecilomyces lilacinus* after non-surgical penetrating trauma. *Enfermedades infecciosas y microbiologia clinica*, 19(7), pp.347-348.

Piquero-Casals, J., Sesto-Casals, D., Savino-Asprino, J.S., Rozas-Muñoz, E., Mir-Bonafé, J.F. and Morgado-Carrasco, D., 2023. Black Piedra in an Amerindian Girl with Oculocutaneous Albinism Type 2. *Dermatology Practical & Conceptual*, pp.e2023165-e2023165.

Pelaez, T., Alvarez-Perez, S., Mellado, E., Serrano, D., Valerio, M., Blanco, J.L., Garcia, M.E., Munoz, P., Cuenca-Estrella, M. and Bouza, E., 2013. Invasive aspergillosis caused by cryptic *Aspergillus* species: a report of two consecutive episodes in a patient with leukaemia. *Journal of medical microbiology*, 62(3), pp.474-478.

Ploysangam, T. and Lucky, A.W., 1997. Childhood white superficial onychomycosis caused by *Trichophyton rubrum*: report of seven cases and review of the literature. *Journal of the American Academy of Dermatology*, 36(1), pp.29-32.

Ply, B., Cañete-Gibas, C.F., Sanders, C., Wiederhold, N.P., Dandar, R.A., Sheppard, J.D. and Cheung, A.Y., 2023. Phialophora chinensis fungal keratitis: An initial case report and species identification. American Journal of Ophthalmology Case Reports, 29, p.101800.

Polat, M., Kara, S.S., Tapısız, A., Demirtaş, Z., Sarı, S., Kalkancı, A., Tezer, H. and Dalgıç, B., 2015. Successful treatment of Paecilomyces variotii peritonitis in a liver transplant patient. Mycopathologia, 179(3), pp.317-320.

Polilli, E., Fazii, P., Ursini, T., Fantini, F., Di Masi, F., Tontodonati, M., Sozio, F. and Parruti, G., 2011. Tinea incognito caused by Microsporum gypseum in a patient with advanced HIV infection: a case report. Case Reports in Dermatology, 3(1), pp.55-59.

Porras-López, C., Frías-De-León, M.G., Arenas, R. and Martínez-Herrera, E., 2019. Chromoblastomycosis caused by Rhinocladiella aquaspersa: first case report in Guatemala. Anais Brasileiros de Dermatologia, 94, pp.574-577.

Posteraro, B., Scarano, E., La Sorda, M., Torelli, R., De Corso, E., Mulé, A., Paludetti, G., Fadda, G. and Sanguinetti, M., 2010. Eosinophilic fungal rhinosinusitis due to the unusual pathogen Curvularia inaequalis. Mycoses, 53(1), pp.84-88.

Pote, S.T., Chakraborty, A., Lahiri, K.K., Patole, M.S., Deshmukh, R.A. and Shah, S.R., 2017. Keratitis by a rare pathogen Colletotrichum gloeosporioides: a case report. Journal de Mycologie Médicale, 27(3), pp.407-411.

Pradeepkumar, N.S. and Joseph, N.M., 2011. Chromoblastomycosis caused by Cladophialophora carrionii in a child from India. The Journal of Infection in Developing Countries, 5(07), pp.556-560.

Prasanna, S., Grover, N., Bhatt, P. and Sahni, A.K., 2016. A case of Aspergillus nidulans causing white granule mycetoma. Medical Journal, Armed Forces India, 72(1), p.88.

Premamalini, T., Anitha, S., Rajyoganandh, S.V., Veena, H. and Kindo, A.J., 2019. Complicated urinary tract infection by Trichosporon loubieri. Medical mycology case reports, 24, pp.86-89.

Purohit, G., Sable, M., Rudramurthy, S.M., Sarkar, S., Parida, P., Deshmukh, V. and Hallur, V., 2021. A rare case of conidiobolomycosis due to Conidiobolus coronatus presenting with dysphagia. Indian Journal of Medical Microbiology, 39(4), pp.558-560.

Putthirangsiwong, B., Mahaisavariya, P., Chokthaweesak, W. and Selva, D., 2019. Periocular cutaneous mucormycosis caused by saksenaea erythrospora. Journal of Pediatric Infectious Diseases, 14(04), pp.209-212.

Qiangqiang, Z., Limo, Q. and Qixian, Q., 2001. Case report. Disseminated tinea of the verrucous type due to epidermophyton floccosum. Mycoses, 44(7-8), pp.326-329.

Qiu, F., Zhang, C.H., Wang, J.D. and Fan, Y.M., 2022. Scrotal tinea caused by Nannizzia incurvata in two men using molecular identification. Journal of the European Academy of Dermatology and Venereology, 36(11), pp.e957-e959.

Quinio, D., Karam, A., Leroy, J.P., Moal, M.C., Bourbigot, B., Masure, O., Sassolas, B. and Le Flohic, A.M., 2004. Zygomycosis caused by Cunninghamella bertholletiae in a kidney transplant recipient. Medical mycology, 42(2), pp.177-180.

Raad, I. and Hachem, R., 1995. Treatment of central venous catheter-related fungemia due to Fusarium oxysporum. Clinical infectious diseases, 20(3), pp.709-711.

Ragnaud JM, Marcesu C, Roche-Bezian MC, Wone C (1984) Infection péritonéale à Trichoderma koningii sur dialyse continue ambulatoire. Med Mal Infect 14:402 – 405.

Rajendran, C., Khaitan, B.K., Mittal, R., Ramam, M., Bhardwaj, M. and Datta, K.K., 2003. Phaeohyphomycosis caused by Exophiala spinifera in India. Medical mycology, 41(5), pp.437-441.

- Raju, B., Santhanakumar, K.S. and Kesavachandran, U., 2020. Gastrointestinal involvement of unusual Mucormycete *Syncephalastrum racemosum* in a diabetic patient with adenocarcinoma: Rare case presentation with review of literature. *Infection*, 48, pp.791-797.
- Ramakrishnan, S., Mandlik, K., Sathe, T.S., Gubert, J., Krishnan, T. and Baskaran, P., 2018. Ocular infections caused by *Scedosporium apiospermum*: a case series. *Indian Journal of Ophthalmology*, 66(1), p.137.
- Ramakrishnan, S., Mandlik, K., Sathe, T.S., Gubert, J., Krishnan, T. and Baskaran, P., 2018. Ocular infections caused by *Scedosporium apiospermum*: a case series. *Indian Journal of Ophthalmology*, 66(1), p.137.
- Rameshkumar, G., Sikha, M., Ponlakshmi, M. and Lalitha, P., 2019. A rare case of *Myrothecium* species causing mycotic keratitis: Diagnosis and management. *Medical mycology case reports*, 25, pp.53-55.
- Ranawaka, R.R., Nagahawatte, A. and Gunasekara, T.A., 2015. *Fusarium* onychomycosis: prevalence, clinical presentations, response to itraconazole and terbinafine pulse therapy, and 1-year follow-up in nine cases. *International Journal of Dermatology*, 54(11), pp.1275-1282.
- Randhawa, H.S., Khan, Z.U. and Gaur, S.N., 1983. *Blastomyces dermatitidis* in India: first report of its isolation from clinical material. *Sabouraudia: Journal of Medical and Veterinary Mycology*, 21(3), pp.215-221.
- Ranque, S., Garcia-Hermoso, D., Michel-Nguyen, A. and Dumon, H., 2008. Isolation of *Trichoderma atroviride* from a liver transplant. *Journal de Mycologie Médicale*, 18(4), pp.234-236.
- Rao, K. and Saha, V., 2000. Medical management of *Aspergillus flavus* endocarditis. *Pediatric hematology and oncology*, 17(5), pp.425-427.
- Rao, S.S., Panda, N.K., Pragache, G., Chakrabarti, A. and Saravanan, K., 2006. Sinoorbital mucormycosis due to *Apophysomyces elegans* in immunocompetent individuals—an increasing trend. *American journal of otolaryngology*, 27(5), pp.366-369.
- Rao, A. and Datta, N., 2013. *Tinea corporis* due to *Trichophyton mentagrophytes* and *Trichophyton tonsurans* mimicking *tinea imbricata*. *Indian Journal of Dermatology, Venereology and Leprology*, 79(4), p.554.
- Rapelanoro, R., Mortureux, P., Couprie, B., Maleville, J. and Taïeb, A., 1996. Neonatal *Malassezia furfur* pustulosis. *Archives of Dermatology*, 132(2), pp.190-193.
- Rasamoelina, T., Maubon, D., Andrianarison, M., Ranaivo, I., Sendrasoa, F., Rakotozandrindrainy, N., Rakotomalala, F.A., Bailly, S., Rakotonirina, B., Andriantsimahavandy, A. and Rabenja, F.R., 2020. Endemic chromoblastomycosis caused predominantly by *Fonsecaea nubica*, Madagascar. *Emerging Infectious Diseases*, 26(6), p.1201.
- Rasheeduddin, M. and Visalakshi, P., 2017. Cutaneous phaeohyphomycosis of foot web by *Curvularia lunata*. *Glob. J. Med. Clin. Case Rep*, 4, pp.074-075.
- Ratcliffe, L., Davies, J., Anson, J., Hales, S., Beeching, N.J. and Beadsworth, M.B.J., 2011. *Candida pelliculosa* meningitis as an opportunistic infection in HIV: the first reported case. *International journal of STD & AIDS*, 22(1), pp.54-56.
- Ray, R., Ghosh, M., Chatterjee, M., Chatterjee, N. and Banerjee, M., 2016. Case report: onychomycosis caused by *Fusarium dimerum*. *J Clin Sci Res*, 5, pp.44-48.
- Razouk, S., Sebbani, S., Agoumi, A., Benouchen, T., Malihi, A., Nacir, A., Abouhafsse, A., Al Hamany, Z. and Tligui, H., 2012. The subcutaneous mucormycosis due to *Lichtheimia corymbifera*: A case report in an immunocompetent child. *Journal De Mycologie Medicale*, 22(2), pp.185-188.
- Read, R.W., Chuck, R.S., Rao, N.A. and Smith, R.E., 2000. Traumatic *Acremonium atrogriseum* keratitis following laser-assisted in situ keratomileusis. *Archives of Ophthalmology*, 118(3), pp.418-421.
- Reddy, M., Venugopal, R., Prakash, P.Y. and Kamath, Y.S., 2017. Corneal ulcer due to a rare coelomycetes fungus *Chaetomium strumarium*: Case report and global review of *Chaetomium* keratomycosis. *Indian journal of ophthalmology*, 65(9), p.871.
- Rezusta, A., Betrán, A., Querol, I., Palacián, M.P. and Revillo, M.J., 2011. *Tinea capitis* caused by *Trichophyton soudanense* and *Microsporum audouinii* in an adult: a case report. *Mycoses*, 54(1), pp.89-90.

Rhee, D.Y., Kim, M.S., Chang, S.E., Lee, M.W., Choi, J.H., Moon, K.C., Koh, J.K. and Choi, J.S., 2009. A case of tinea manuum caused by *Trichophyton mentagrophytes* var. *erinacei*: the first isolation in Korea. *Mycoses*, 52(3), pp.287-290.

Riat, A., Neofytos, D., Coste, A., Harbarth, S., Bizzini, A., Grandbastien, B., Pugin, J. and Lamothe, F., 2018. First case of *Candida auris* in Switzerland: discussion about preventive strategies. *Swiss medical weekly*, 148.

Rickerts, V., Böhme, A., Viertel, A., Behrendt, G., Jacobi, V., Tintelnot, K. and Just-Nübling, G., 2000. Cluster of pulmonary infections caused by *Cunninghamella bertholletiae* in immunocompromised patients. *Clinical Infectious Diseases*, 31(4), pp.910-913.

Rimawi, B.H., Rimawi, R.H., Mirdamadi, M., Steed, L.L., Marchell, R., Sutton, D.A., Thompson, E.H., Wiederhold, N.P., Lindner, J.R. and Boger, M.S., 2013. A case of *Exophiala oligosperma* successfully treated with voriconazole. *Medical mycology case reports*, 2, pp.144-147.

Rinaldi, S., Fiscarelli, E. and Rizzoni, G., 2000. *Paecilomyces variotii* peritonitis in an infant on automated peritoneal dialysis. *Pediatric nephrology*, 14(5), pp.365-366.

Rippon, J.W., Larson, R.A., Rosenthal, D.M. and Clayman, J., 1988. Disseminated cutaneous and peritoneal hyalohyphomycosis caused by *Fusarium* species: three cases and review of the literature. *Mycopathologia*, 101(2), pp.105-111.

Ritterband, D.C., Shah, M. and Seedor, J.A., 1997. *Colletotrichum graminicola*: a new corneal pathogen. *Cornea*, 16(3), pp.362-364.

Rivero, M., Hidalgo, A., Alastruey-Izquierdo, A., Cía, M., Torroba, L. and Rodríguez-Tudela, J.L., 2009. Infections due to *Phialemonium* species: case report and review. *Sabouraudia*, 47(7), pp.766-774.

Rizzitelli, G., Guanziroli, E., Moschin, A., Sangalli, R. and Veraldi, S., 2016. Onychomycosis caused by *Trichosporon mucoides*. *International Journal of Infectious Diseases*, 42, pp.61-63.

Robert, T., Talarmin, J.P., Leterrier, M., Cassagnau, E., Pape, P.L., Danner-Boucher, I., Malard, O., Brocard, A., Gay-Andrieu, F., Miegerville, M. and Morio, F., 2012. Phaeohyphomycosis due to *Alternaria infectoria*: a single-center experience with utility of PCR for diagnosis and species identification. *Medical Mycology*, 50(6), pp.594-600.

Robertshaw, H. and Higgins, E., 2005. Cutaneous infection with *Alternaria tenuissima* in an immunocompromised patient. *British Journal of Dermatology*, 153(5), pp.1047-1049.

Rodríguez-Ares, T., De Rojas Silva, V., Ferreiros, M.P., Becerra, E.P., Tome, C.C. and Sanchez-Salorio, M., 2000. *Acremonium* keratitis in a patient with herpetic neurotrophic corneal disease. *Acta Ophthalmologica Scandinavica*, 78(1), pp.107-109.

Rodríguez-Villalobos, H., Georgala, A., Beguin, H., Heymans, C., Pye, G., Crokaert, F. and Aoun, M., 2003. Disseminated infection due to *Cylindrocarpon* (*Fusarium*) *lichenicola* in a neutropenic patient with acute leukaemia: report of a case and review of the literature. *European Journal of Clinical Microbiology and Infectious Diseases*, 22(1), pp.62-65.

Rodríguez-Gutiérrez, G., Carrillo-Casas, E.M., Arenas, R., García-Méndez, J.O., Toussaint, S., Moreno-Morales, M.E., Schcolnik-Cabrera, A.A., Xicohtencatl-Cortes, J. and Hernández-Castro, R., 2015. Mucormycosis in a non-hodgkin lymphoma patient caused by *Syncephalastrum racemosum*: case report and review of literature. *Mycopathologia*, 180, pp.89-93.

Rodríguez, J.Y., Rodríguez, G.J., Morales-López, S.E., Cantillo, C.E., Le Pape, P. and Álvarez-Moreno, C.A., 2016. *Saksenaia erythrospora* infection after medical tourism for esthetic breast augmentation surgery. *International Journal of Infectious Diseases*, 49, pp.107-110.

Rodríguez, J.Y., Morales-López, S.E., Rodríguez, G.J., Álvarez-Moreno, C.A., Ocampo, W., Cepeda, M.L. and Mora-Valderrama, M.A., 2018. Necrotizing fasciitis caused by *Apophysomyces variabilis* in an immunocompetent patient. *Medical mycology case reports*, 20, pp.4-6.

Roels, D., Coorevits, L. and Lagrou, K., 2020. Tintelnotia destructans as an emerging opportunistic pathogen: First case of T. destructans superinfection in herpetic keratitis. American Journal of Ophthalmology Case Reports, 19, p.100791.

Roilides, E., Sigler, L., Bibashi, E., Katsifa, H., Flaris, N. and Panteliadis, C., 1999. Disseminated infection due to Chrysosporium zonatum in a patient with chronic granulomatous disease and review of non-Aspergillus fungal infections in patients with this disease. Journal of Clinical Microbiology, 37(1), pp.18-25.

Rojas, O.C., González, G.M., Moreno-Treviño, M. and Salas-Alanis, J., 2015. Chromoblastomycosis by Cladophialophora carrionii associated with squamous cell carcinoma and review of published reports. Mycopathologia, 179, pp.153-157.

Roger, P.M., Boissy, C., Gari-Toussaint, M., Foucher, R., Mondain, V., Vandenbos, F., Le Fichoux, Y., Michiels, J. and Dellamonica, P., 2000. Medical treatment of a pacemaker endocarditis due to Candida albicans and to Candida glabrata. Journal of Infection, 41(2), pp.176-178.

Romano, C., Fimiani, M., Pellegrino, M., Valenti, L., Casini, L., Miracco, C. and Faggi, E., 1996. Cutaneous phaeohyphomycosis due to Alternaria tenuissima: Alternaria tenuissima-bedingte kutane Phaeohyphomykose. Mycoses, 39(5-6), pp.211-215.

Romano, C., Valenti, L., Miracco, C., Alessandrini, C., Paccagnini, E., Faggi, E. and Difonzo, E.M., 1997. Two cases of cutaneous phaeohyphomycosis by Alternaria alternata and Alternaria tenuissima. Mycopathologia, 137, pp.65-74.

Romano, C., Miracco, C. and Difonzo, E.M., 1998. Skin and nail infections due to Fusarium oxysporum in Tuscany, Italy: Fusarium oxysporum als Erreger von Haut-und Nagelinfektionen in der Toskana, Italien. Mycoses, 41(9-10), pp.433-437.

Romano, C., De Aloe, G., Calcaterra, R. and Gianni, C., 2002. Tinea capitis due to Trichophyton soudanense and Trichophyton schoenleinii. Mycoses, 45(11-12), pp.518-521.

Romano, C., Rubegni, P., Ghilardi, A. and Fimiani, M., 2006. A case of bullous tinea pedis with dermatophytid reaction caused by Trichophyton violaceum. Mycoses, 49(3), pp.249-250.

Romano, C., Caposciutti, P., Ghilardi, A., Miracco, C. and Fimiani, M., 2010. A case of primary localized cutaneous infection due to Fusarium oxysporum. Mycopathologia, 170(1), pp.39-46.

Romano, C., Bilenchi, R., Alessandrini, C. and Miracco, C., 1999. Case report. Cutaneous phaeohyphomycosis caused by Cladosporium oxysporum. Mycoses, 42(1-2), pp.111-115.

Ross, J.J. and Keeling, D.N., 2000. Cutaneous blastomycosis in New Brunswick: case report. CMAJ, 163(10), pp.1303-1305.

Rota, S., Marchesi, D., Farina, C. and De Bièvre, C., 2000. Trichoderma pseudokoningii peritonitis in automated peritoneal dialysis patient successfully treated by early catheter removal. Peritoneal Dialysis International, 20(1), pp.91-93.

Ruan, Q., Zhu, Y., Chen, S., Zhu, L., Zhang, S. and Zhang, W., 2017. Disseminated cryptococcosis with recurrent multiple abscesses in an immunocompetent patient: a case report and literature review. BMC Infectious Diseases, 17(1), pp.1-6.

Rudramurthy, S.M., Chakrabarti, A., Paul, R.A., Sood, P., Kaur, H., Capoor, M.R., Kindo, A.J., Marak, R.S., Arora, A., Sardana, R. and Das, S., 2017. Candida auris candidaemia in Indian ICUs: analysis of risk factors. Journal of Antimicrobial Chemotherapy, 72(6), pp.1794-1801.

Ruiz, G.B. and Lorenz, A., 2021. What do we know about the biology of the emerging fungal pathogen of humans Candida auris?. Microbiological Research, 242, p.126621.

Ruiz, L.R.B., Zaitz, C., Lellis, R.F. and Veasey, J.V., 2020. Pseudomycetoma of the scalp caused by Microsporum canis. Anais Brasileiros de Dermatologia, 95, pp.372-375.



Ryan, M.E., Kirchner, J.P., Sell, T. and Swanson, M., 1989. Cholangitis due to *Blastomyces dermatitidis*. *Gastroenterology*, 96(5), pp.1346-1349.

Ryan, K., Cañete-Gibas, C., Sanders, C. *et al.* *Pseudocanariomyces americanus*, gen. nov., sp. nov., A New Thielavia-Like Species in the Chaetomiaceae: Identification and Management of a Prosthetic Hip Infection. *Mycopathologia* **186**, 441–447 (2021). <https://doi.org/10.1007/s11046-021-00555-z>

Sadahiro, A., Moraes, J.R.F., Moraes, M.E.H., Romero, M., Gouvea, N.A.D.L., Gouvea, C.J., Ogusku, M.M., Campbell, I. and Zaitz, C., 2004. HLA in Brazilian Ashkenazic Jews with chronic dermatophytosis caused by *Trichophyton rubrum*. *Brazilian journal of microbiology*, 35, pp.69-73.

Saeedi, O.J., Iyer, S.A., Mohiuddin, A.Z. and Hogan, R.N., 2013. *Exophiala jeanselmei* keratitis: case report and review of literature. *Eye & Contact Lens*, 39(6), pp.410-412.

Saenz, R.E., Brown, W.D. and Sanders, C.V., 2001. Allergic bronchopulmonary disease caused by *Bipolaris hawaiiensis* presenting as a necrotizing pneumonia: case report and review of literature. *The American journal of the medical sciences*, 321(3), pp.209-212.

Safneck, J.R., Hogg, G.R. and Napier, L.B., 1990. Endophthalmitis due to *Blastomyces dermatitidis*: case report and review of the literature. *Ophthalmology*, 97(2), pp.212-216.

Sageerabanoo, A.M., Oudeacoumar, P. and Udayashankar, C., 2011. Onychomycosis due to *Trichosporon mucoides*. *Indian Journal of Dermatology, Venereology and Leprology*, 77, p.76.

Saha, S., Sengupta, J., Banerjee, D., Khetan, A. and Mandal, S.M., 2013. *Schizophyllum commune*: a new organism in eye infection. *Mycopathologia*, 175, pp.357-360.

Saiz, P., Gitelis, S., Virkus, W., Piasecki, P., Bengana, C. and Templeton, A., 2004. Blastomycosis of long bones. *Clinical Orthopaedics and Related Research®*, 421, pp.255-259.

Salem, M.B., Hamouda, M., Mohamed, M., Aloui, S., Letaief, A., Moussa, A., Skhiri, H., Zakahama, A. and Dhia, N.B., 2017, September. *Blastomyces dermatitidis* in a renal transplant recipient: a case report. In *Transplantation Proceedings* (Vol. 49, No. 7, pp. 1583-1586). Elsevier.

Salit, R.B., Shea, Y.R., Gea-Banacloche, J., Fahle, G.A., Abu-Asab, M., Sugui, J.A., Carpenter, A.E., Quezado, M.M., Bishop, M.R. and Kwon-Chung, K.J., 2010. Death by edible mushroom: first report of *Volvariella volvacea* as an etiologic agent of invasive disease in a patient following double umbilical cord blood transplantation. *Journal of clinical microbiology*, 48(11), pp.4329-4332.

Salle, V., Lecuyer, E., Chouaki, T., Lescure, F.X., Smail, A., Vaidie, A., Dayen, C., Schmit, J.L., Ducroix, J.P. and Douadi, Y., 2005. *Paecilomyces variotii* fungemia in a patient with multiple myeloma: case report and literature review. *Journal of Infection*, 51(3), pp.e93-e95.

Samaddar, A., Sharma, A., Maurya, V.K. and Tak, V., 2019. Necrotizing fasciitis caused by *Apophysomyces variabilis* in a burn patient. *IDCases*, 18, p.e00660.

Samaddar, A., Shrimali, T., Tiwari, S. and Sharma, A., 2023a. First report of human infection caused by *Curvularia warraberensis*, manifesting as invasive sinusitis with intracranial involvement. *Journal of Medical Mycology*, 33(1), p.101337.

Samaddar, A., Shrimali, T. and Sharma, A., 2023b. Subcutaneous mycosis caused by filamentous basidiomycete *Megasporoporia setulosa*-first report of human infection. *Medical Mycology Case Reports*, 41, pp.27-32.

Samaddar, A. and Sharma, A., 2023. First case of neonatal fungemia caused by *Aureobasidium melanogenum*. *Journal of Medical Mycology*, 33(1), p.101334.

Sandhu, J., Kohli, J.K., Gupta, S.K. and Gupta, V., 2022. Case Report: Plantar Cyst Caused by *Phaeoacremonium inflatipes* in an Immunocompetent Male, Resolving with Combination Potassium Iodide and Itraconazole Therapy. *The American Journal of Tropical Medicine and Hygiene*, 107(1), p.113.

Satoh, K., Makimura, K., Hasumi, Y., Nishiyama, Y., Uchida, K. and Yamaguchi, H., 2009. *Candida auris* sp. nov., a novel ascomycetous yeast isolated from the external ear canal of an inpatient in a Japanese hospital. *Microbiology and immunology*, 53(1), pp.41-44.

Sautour, M., Chrétien, M.L., Valot, S., Lafon, I., Basmaciyan, L., Legouge, C., Verrier, T., Gonssaud, B., Abou-Hanna, H., Dalle, F. and Caillot, D., 2018. First case of proven invasive pulmonary infection due to *Trichoderma longibrachiatum* in a neutropenic patient with acute leukemia. *Journal de mycologie medicale*, 28(4), pp.659-662.

Schlebusch, S. and Looke, D.F., 2005. Intraabdominal zygomycosis caused by *Syncephalastrum racemosum* infection successfully treated with partial surgical debridement and high-dose amphotericin B lipid complex. *Journal of clinical microbiology*, 43(11), pp.5825-5827.

Schelenz, S., Hagen, F., Rhodes, J.L., Abdolrasouli, A., Chowdhary, A., Hall, A., Ryan, L., Shackleton, J., Trimlett, R., Meis, J.F. and Armstrong-James, D., 2016. First hospital outbreak of the globally emerging *Candida auris* in a European hospital. *Antimicrobial Resistance & Infection Control*, 5(1), pp.1-7.

Schwartz, I.S., Muñoz, J.F., Kenyon, C.R., Govender, N.P., McTaggart, L., Maphanga, T.G., Richardson, S., Becker, P., Cuomo, C.A., McEwen, J.G. and Sigler, L., 2021. Blastomycosis in Africa and the Middle East: a comprehensive review of reported cases and reanalysis of historical isolates based on molecular data. *Clinical Infectious Diseases*, 73(7), pp.e1560-e1569.

Schwartz, I.S., Wiederhold, N.P., Hanson, K.E., Patterson, T.F. and Sigler, L., 2019. *Blastomyces helicus*, a new dimorphic fungus causing fatal pulmonary and systemic disease in humans and animals in Western Canada and the United States. *Clinical Infectious Diseases*, 68(2), pp.188-195.

Schwartz, I.S., Sanche, S., Wiederhold, N.P., Patterson, T.F. and Sigler, L., 2018. *Emergomyces canadensis*, a dimorphic fungus causing fatal systemic human disease in North America. *Emerging Infectious Diseases*, 24(4), p.758.

Shigemura, T., Agematsu, K., Yamazaki, T., Eriko, K., Yasuda, G., Nishimura, K. and Koike, K., 2009. Femoral osteomyelitis due to *Cladophialophora arxii* in a patient with chronic granulomatous disease. *Infection*, 37(5), pp.469-473.

Schleman, K.A., Tullis, G. and Blum, R., 2000. Intracardiac mass complicating *Malassezia furfur* fungemia. *Chest*, 118(6), pp.1828-1829.

Schell, W.A. and Perfect, J.R., 1996. Fatal, disseminated *Acremonium strictum* infection in a neutropenic host. *Journal of clinical microbiology*, 34(5), pp.1333-1336.

Schoeppler, K.E., Zamora, M.R., Northcutt, N.M., Barber, G.R., O'Malley-Schroeder, G. and Lyu, D.M., 2015. Invasive *Microascus trigonosporus* species complex pulmonary infection in a lung transplant recipient. *Case Reports in Transplantation*, 2015.

Schober, S., Stanchi, K.M.C., Riecker, A., Pfeiffer, M., Tsiflikas, I., Wiegand, G., Quintanilla-Martinez, L., Haen, S., Ebinger, M., Lang, P. and Handgretinger, R., 2021. Fulminant *Rhizomucor pusillus* mucormycosis during anti-leukemic treatment with blinatumomab in a child: A case report and review of the literature. *Medical mycology case reports*, 32, pp.4-9.

Scott, R.S., Sutton, D.A. and Jagirdar, J., 2005. Lung infection due to opportunistic fungus, *Phialemonium obovatum*, in a bone marrow transplant recipient: an emerging infection with fungemia and Crohn disease–like involvement of the gastrointestinal tract. *Annals of Diagnostic Pathology*, 9(4), pp.227-230.

Scott, I.U., Flynn, H.W., Miller, D., Speights, J.W., Snip, R.C. and Brod, R.D., 2001. Exogenous endophthalmitis caused by amphotericin B-resistant *Paecilomyces lilacinus*: treatment options and visual outcomes. *Archives of Ophthalmology*, 119(6), pp.916-919.

Sebbane, I., Lahlimi, F., Tazi, I., Lahrougui, A. and Amal, S., 2022. Cutaneous Fusariosis by a Species of the *Fusarium Dimerum* in Acute Myeloblastic Leukemia Patient: A Case Report. *American Journal of Laboratory Medicine*, 7(2), pp.28-31.

Segrelles-Calvo, G., Glauber, R.D.S., Llopis-Pastor, E. and Frasés, S., 2021. Trichosporon asahii as cause of nosocomial pneumonia in patient with COVID-19: a triple co-infection. Archivos de bronconeumologia, 57, p.46.

Seki, A., Yoshida, A., Matsuda, Y., Kawata, M., Nishimura, T., Tanaka, J., Misawa, Y., Nakano, Y., Asami, R., Chida, K. and Kikuchi, K., 2017. Fatal fungal endocarditis by Aspergillus udagawae: an emerging cause of invasive aspergillosis. Cardiovascular Pathology, 28, pp.14-17.

Siddiqui, A.S. and Zimmerman, J.L., 2016. Pulmonary infection secondary to Chrysosporium zonatum in an immunocompetent man. Annals of the American Thoracic Society, 13(5), pp.757-758.

Gamze Sener, A., Yucesoy, M., Senturkun, S., Afsar, I., Gul Yurtsever, S. and Turk, M., 2008. A case of Acremonium strictum peritonitis. Sabouraudia, 46(5), pp.495-497.

Shah, A.V., McColley, S.A., Weil, D. and Zheng, X., 2014. Trichosporon mycotoxinivorans infection in patients with cystic fibrosis. Journal of clinical microbiology, 52(6), pp.2242-2244.

Shah, C.V., Jones, D.B. and Holz, E.R., 2001. Microspaeopsis olivacea keratitis and consecutive endophthalmitis. *American journal of ophthalmology*, 131(1), pp.142-143.

Shang, S.T., Yang, Y.S. and Peng, M.Y., 2010. Nosocomial Trichosporon asahii fungemia in a patient with secondary hemochromatosis: a rare case report. Journal of Microbiology, Immunology and Infection, 43(1), pp.77-80.

Sharma, R., Farmer, C.K., Gransden, W.R. and Ogg, C.S., 1998. Peritonitis in continuous ambulatory peritoneal dialysis due to Cylindrocarpon lichenicola infection. Nephrology, dialysis, transplantation: official publication of the European Dialysis and Transplant Association-European Renal Association, 13(10), pp.2662-2664.

Sharma, B. and Nonzom, S., 2021. Novel cases of cutaneous phaeohyphomycosis by Alternaria alstromeriae, Epicoccum tritici and Phialemonium obovatum from North India. *Mycoses*, 64(12), pp.1489-1497.

Sharmin, S., Ohori, A., Sano, A., Kamei, K., Yamaguchi, M., Takeo, K., Uno, J., Nishimura, K. and Miyaji, M., 2003. Histoplasma capsulatum variety duboisii isolated in Japan from an HIV-infected Ugandan patient. Nippon Ishinkin Gakkai Zasshi, 44(4), pp.299-306.

Sharma, N., Batra, H., Mehta, M. and Chander, J., 2014. Maxillary Osteomyelitis Caused by Apophysomyces Variabilis-Emerging Trends. Open Access Macedonian Journal of Medical Sciences, 2(2), pp.303-308.

Sharma, A., Hazarika, N.K., Barua, P., Shivaprakash, M.R. and Chakrabarti, A., 2013. Acremonium strictum: report of a rare emerging agent of cutaneous hyalohyphomycosis with review of literatures. Mycopathologia, 176, pp.435-441.

Sharma, B. and Nonzom, S., 2021. Novel cases of cutaneous phaeohyphomycosis by Alternaria alstromeriae, Epicoccum tritici and Phialemonium obovatum from North India. *Mycoses*, 64(12), pp.1489-1497.

Shaukat, A., Al Ansari, N., Al Wali, W., Karic, E., El Madhoun, I., Mitwally, H., Hamed, M. and Alutra-Visan, F., 2021. Experience of treating Candida auris cases at a general hospital in the state of Qatar. IDCases, 23, p.e01007.

Shigemura, T., Nakazawa, Y., Amano, Y., Sudo, A., Watanabe, M., Kobayashi, M., Kobayashi, N., Koike, K., Agematsu, K. and Nishimura, K., 2015. Subcutaneous abscess due to the basidiomycete Phellinus mori in a patient with chronic granulomatous disease. Infection, 43, pp.371-375.

Shigeyasu, C., Yamada, M., Nakamura, N., Mizuno, Y., Sato, T. and Yaguchi, T., 2012. Keratomycosis caused by Aspergillus viridinutans: an Aspergillus fumigatus-resembling mold presenting distinct clinical and antifungal susceptibility patterns. Medical Mycology, 50(5), pp.525-528.

Shih, M.H., Sheu, M.M., Chen, H.Y. and Lin, S.R., 1999. Fungal keratitis caused by Candida utilis--case report. The Kaohsiung journal of medical sciences, 15(3), pp.171-174.

Shiraishi, A., Araki-Sasaki, K., Mitani, A., Miyamoto, H., Sunada, A., Ueda, A., Asari, S., Zheng, X., Yamamoto, Y., Hara, Y. and Ohashi, Y., 2011. Clinical characteristics of keratitis due to *Colletotrichum gloeosporioides*. *Journal of Ocular Pharmacology and Therapeutics*, 27(5), pp.487-491.

Shivadasan, J., Raksha, K. and Urs, P.S., 2016. *Candida utilis* causing neonatal Candidemia—A case report and literature review. *Apollo Medicine*, 13(1), pp.55-58.

Shivaprakash, M.R., Singh, G., Gupta, P., Dhaliwal, M., Kanwar, A.J. and Chakrabarti, A., 2011. Extensive white piedra of the scalp caused by *Trichosporon inkin*: A case report and review of literature. *Mycopathologia*, 172, pp.481-486.

Shivaprakash, M.R., Appannanavar, S.B., Dhaliwal, M., Gupta, A., Gupta, S., Gupta, A. and Chakrabarti, A., 2011. *Colletotrichum truncatum*: an unusual pathogen causing mycotic keratitis and endophthalmitis. *Journal of Clinical Microbiology*, 49(8), pp.2894-2898.

Shivasabesan, G., Logan, B., Brennan, X., Lau, C., Vaze, A., Bennett, M., Gorrie, N., Mirdad, F., Devezza, R., Koo, C.M. and McCluskey, P., 2022. Disseminated *Aspergillus lentulus* infection in a heart transplant recipient: a case report. *Clinical Infectious Diseases*, 75(7), pp.1235-1238.

Sigera, L.S.M., Narangoda, K.U.L., Dahanayake, M.Y., Shabri, U.L.F., Malkanthi, M.A., Jayasekera, P.I. and Kolambage, H.A.L.P., 2020. Mycetoma due to *Madurella mycetomatis*. *IDCases*, 21, p.e00857.

Sigler, L., Estrada, S., Montealegre, N.A., Jaramillo, E., Arango, M., De Bedout, C. and Restrepo, A., 1997. Maxillary sinusitis caused by *Schizophyllum commune* and experience with treatment. *Journal of Medical and Veterinary Mycology*, 35(5), pp.365-370.

Sigler, L., Bartley, J.R., Parr, D.H. and Morris, A.J., 1999. Maxillary sinusitis caused by medusoid form of *Schizophyllum commune*. *Journal of Clinical Microbiology*, 37(10), pp.3395-3398.

Silva, M.E., Malogolowkin, M.H., Hall, T.R., Sadeghi, A.M. and Krogstad, P., 2000. Mycotic aneurysm of the thoracic aorta due to *Aspergillus terreus*: case report and review. *Clinical infectious diseases*, 31(5), pp.1144-1148.

Silva, V., Zepeda, G. and Alvareda, D., 2003. Nosocomial urinary infection due to *Trichosporon asahii*. First two cases in Chile. *Revista Iberoamericana de Micologia*, 20(1), pp.21-23.

Silva-Vergara, M.L., de Camargo, Z.P., Silva, P.F., Abdalla, M.R., Sgarbieri, R.N., Rodrigues, A.M., dos Santos, K.C., Barata, C.H. and Ferreira-Paim, K., 2012. Case report: disseminated *Sporothrix brasiliensis* infection with endocardial and ocular involvement in an HIV-infected patient. *The American journal of tropical medicine and hygiene*, 86(3), p.477.

Simarro, E., Marin, F., Morales, A., Sanz, E., Perez, J. and Ruiz, J., 2001. Fungemia due to *Scedosporium prolificans*: a description of two cases with fatal outcome. *Clinical microbiology and infection*, 7(11), pp.645-647.

Singal, A., Pandhi, D., Bhattacharya, S.N., Das, S., Aggarwal, S. and Mishra, K., 2008. Pheohyphomycosis caused by *Exophiala spinifera*: a rare occurrence. *International journal of dermatology*, 47(1), pp.44-47.

Singh, S.M., Naidu, J. and Pouranik, M., 1990. Ungual and cutaneous phaeohyphomycosis caused by *Alternaria alternata* and *Alternaria chlamydospora*. *Journal of Medical and Veterinary Mycology*, 28(4), pp.275-278.

Simon, L., Gastaud, L., Martiano, D., Bailleux, C., Hasseine, L. and Gari-Toussaint, M., 2018. First endogenous fungal endophthalmitis due to *Fusarium dimerum*: A severe eye infection contracted during induction chemotherapy for acute leukemia. *Journal de Mycologie Médicale*, 28(2), pp.403-406.

Singh, S., Sobel, J.D., Bhargava, P., Boikov, D. and Vazquez, J.A., 2002. Vaginitis due to *Candida krusei*: epidemiology, clinical aspects, and therapy. *Clinical infectious diseases*, 35(9), pp.1066-1070.

Slomka, M. and Doub, J., 2020. A rare case of *Blastomyces dermatitidis* brain abscess in an immunocompetent host. *Medical mycology case reports*, 28, pp.8-11.

- Smriti, C., Anuradha, S., Kamlesh, T., Isampreet, K. and Nitin, K., 2015. Tinea corporis due to *Trichophyton violaceum*: A report of two cases. *Indian Journal of Medical Microbiology*, 33(4), pp.596-598.
- Soankasina, A.H., Rakotozandrindrainy, N., Andrianteloasy, S., Zafindraibe, N.J., Rasamoelina, T., Rafalimanana, C., Cornet, M., Razanakolona, L.R., Rasamindrakotroka, A. and Andrianarivelo, M.R., 2018. Dermatophyte infection caused by *Nannizzia gypsea*: a rare case report from Madagascar. *Medical mycology case reports*, 20, pp.7-9.
- Solano, T., Atkins, B., Tambosis, E., Mann, S. and Gottlieb, T., 2000. Disseminated mucormycosis due to *Saksenaea vasiformis* in an immunocompetent adult. *Clinical infectious diseases*, 30(6), pp.942-943.
- Song, K.Y., Park, C., Byun, J.H., Chun, H.S., Choi, J.H., Han, E.H., Lee, S.O., Jeong, Y., Kim, Y.J. and Kim, S.H., 2020. Fungal arthritis with adjacent osteomyelitis caused by *Candida pelliculosa*: a case report. *Bmc Infectious Diseases*, 20(1), pp.1-6.
- Song, Y., Liu, X., de Hoog, G.S. and Li, R., 2021. Disseminated cryptococcosis presenting as cellulitis diagnosed by laser capture microdissection: A case report and literature review. *Mycopathologia*, 186(3), pp.423-433.
- Sood, S., Pathak, D., Sharma, R. and Rishi, S., 2006. Case Report-Urinary tract infection by *Trichosporon a sahi*. *Indian Journal of Medical Microbiology*, 24(4), pp.294-296.
- Souza, B.D.S., Sartori, D.S., Andrade, C.D., Weisheimer, E. and Kiszewski, A.E., 2016. Dermatophytosis caused by *Microsporum gypseum* in infants: report of four cases and review of the literature. *Anais brasileiros de dermatologia*, 91, pp.823-825.
- Stavropoulou, E., Coste, A.T., Beigelman-Aubry, C., Letovanec, I., Spertini, O., Lovis, A., Krueger, T., Burger, R., Bochud, P.Y. and Lamoth, F., 2020. *Conidiobolus pachyzygosporus* invasive pulmonary infection in a patient with acute myeloid leukemia: case report and review of the literature. *BMC infectious diseases*, 20, pp.1-6.
- Suankratay, C., Dhissayakamol, O., Uaprasert, N. and Chindamporn, A., 2015. Invasive pulmonary infection caused by *Chrysosporium articulatum*: the first case report. *Mycoses*, 58(1), pp.1-3.
- Subhashini BSVV, S., Ramana, P.V. and Kamala, P., A Clinical and Diagnostic and Approach of Eumycetoma in the Axilla of a Patient at Tertiary Care Hospital. Volume 18, Issue 7 Ser. 11 (July. 2019)
- Subramanian, C. and Sobel, J.D., 2011. A case of *Conidiobolus coronatus* in the vagina. *Medical Mycology*, 49(4), pp.427-429.
- Sughayer, M., DeGirolami, P.C., Khetry, U., Korzeniowski, D., Grumney, A., Pasarell, L. and McGinnis, M.R., 1991. Human infection caused by *Exophiala pisciphila*: case report and review. *Reviews of infectious diseases*, 13(3), pp.379-382.
- Suchitra, S.M., Nayak, R.R., Pai, V. and Archana, B.K., 2020. Mycotic keratitis due to *Cylindrocarpum lichenicola*: Successful salvage of the eye. *Indian journal of medical microbiology*, 38(3-4), pp.472-474.
- Sousa, M.D.G.T.D., Santana, G.B., Criado, P.R. and Benard, G., 2015. Chronic widespread dermatophytosis due to *Trichophyton rubrum*: a syndrome associated with a *Trichophyton*-specific functional defect of phagocytes. *Frontiers in microbiology*, 6, p.801.
- Sridhar, M.S., Garg, P., Bansal, A.K. and Gopinathan, U., 2000. *Aspergillus flavus* keratitis after laser in situ keratomileusis. *American journal of ophthalmology*, 129(6), pp.802-804.
- Steinbach, W.J., Benjamin Jr, D.K., Kontoyiannis, D.P., Perfect, J.R., Lutsar, I., Marr, K.A., Lionakis, M.S., Torres, H.A., Jafri, H. and Walsh, T.J., 2004. Infections due to *Aspergillus terreus*: a multicenter retrospective analysis of 83 cases. *Clinical Infectious Diseases*, 39(2), pp.192-198.
- Su, H., Li, L., Cheng, B., Zhu, J., Zhang, Q., Xu, J. and Zhu, M., 2017. *Trichophyton rubrum* infection characterized by Majocchi's granuloma and deeper dermatophytosis: case report and review of published literature. *Mycopathologia*, 182, pp.549-554.

Su, H., Li, L., Cheng, B., Zhu, J., Zhang, Q., Xu, J. and Zhu, M., 2017. *Trichophyton rubrum* infection characterized by Majocchi's granuloma and deeper dermatophytosis: case report and review of published literature. *Mycopathologia*, 182, pp.549-554.

Suchitha, S., Sheeladevi, C.S., Sunila, R. and Manjunath, G.V., 2012. Disseminated cryptococcosis in an immunocompetent patient: a case report. *Case Reports in Pathology*, 2012.

Sun, P.L., Chi, C.C., Shih, I.H. and Fan, Y.C., 2023. *Nannizzia polymorpha* as Rare Cause of Skin Dermatophytosis. *Emerging Infectious Diseases*, 29(7), p.1451.

Surash, S., Tyagi, A., De Hoog, G.S., Zeng, J.S., Barton, R.C. and Hobson, R.P., 2005. Cerebral phaeohyphomycosis caused by *Fonsecaea monophora*. *Medical mycology*, 43(5), pp.465-472.

Surpam, R.B., Deshpande, S.D., Saraswathi, K., Amladi, S. and Savant, S., 2006. *Trichophyton violaceum*: A rare isolate in 18-day-old neonate. *Indian J Med Microbiol*, 24, pp.292-3.

Su-yang, H.U.A.N.G., Qing-tao, K.O.N.G., Xue, D.U., Rui, Y.A.N.G. and Hong, S.A.N.G., 2016. A case of misdiagnosed tinea faciei caused by *Arthroderma vanbreuseghemii*. *Chinese Journal of Mycology*, 11(4), p.219.

Sujatha, S., Sheeladevi, C., Khyriem, A.B., Parija, S.C. and Thappa, D.M., 2003. Subcutaneous zygomycosis caused by *Basidiobolus ranarum*-a case report. *Indian Journal of Medical Microbiology*, 21(3), pp.205-206.

Swain B, Panigrahy R, Panigrahi D. *Schizophyllum commune* sinusitis in an immunocompetent host. *Indian Journal of Medical Microbiology*. 2011 Oct 1;29(4):439.

Swami, T., Pannu, S., Kumar, M. and Gupta, G., 2016. Chronic invasive fungal rhinosinusitis by *Paecilomyces variotii*: a rare case report. *Indian Journal of Medical Microbiology*, 34(1).

Swartz, J. and Stoller, J.K., 2009. Acute eosinophilic pneumonia complicating *Coccidioides immitis* pneumonia: a case report and literature review. *Respiration*, 77(1), pp.102-106.

Sweet, D. and Reid, M., 1998. Disseminated neonatal *Trichosporon beigelii* infection: successful treatment with liposomal amphotericin B. *Journal of Infection*, 36(1), pp.120-121.

Symoens, F., Knoop, C., Schrooyen, M., Denis, O., Estenne, M., Nolard, N. and Jacobs, F., 2006. Disseminated *Scedosporium apiospermum* infection in a cystic fibrosis patient after double-lung transplantation. *The Journal of heart and lung transplantation*, 25(5), pp.603-607.

Tabarsi P, Khalili N, Pourabdollah M, Sharifynia S, Safavi Naeini A, Ghorbani J, Mohamadnia A, Abtahian Z, Askari E. Case Report: COVID-19-associated Rhinosinusitis Mucormycosis Caused by *Rhizopus arrhizus*: A Rare but Potentially Fatal Infection Occurring After Treatment with Corticosteroids. *Am J Trop Med Hyg*. 2021 Jul 8;105(2):449-453. doi: 10.4269/ajtmh.21-0359. PMID: 34237015; PMCID: PMC8437195.

Taj-Aldeen, S.J., Hilal, A.A. and Schell, W.A., 2004. Allergic fungal rhinosinusitis: a report of 8 cases. *American journal of otolaryngology*, 25(3), pp.213-218.

Taj-Aldeen, S.J., Gene, J., Bozom, I.A., Buzina, W., Cano, J.F. and Guarro, J., 2006. Gangrenous necrosis of the diabetic foot caused by *Fusarium acutatum*. *Medical Mycology*, 44(6), pp.547-552.

Taj-Aldeen, S.J., Al-Ansari, H.I., Boekhout, T. and Theelen, B., 2004. Co-isolation of *Trichosporon inkin* and *Candida parapsilosis* from a scalp white piedra case. *Medical mycology*, 42(1).

Taguchi, K., Oharaseki, T., Yokouchi, Y., Kawabata, T., Wakayama, M., Ogoshi, T., Iwabuchi, S., Shibuya, K., Nishimura, K. and Takahashi, K., 2007. Allergic fungal sinusitis caused by *Bipolaris spicifera* and *Schizophyllum commune*. *Medical Mycology*, 45(6), pp.559-564.

Tambe, S.A., Dhurat, S.R., Kumar, C.A., Thakare, P., Lade, N., Jerajani, H. and Mathur, M., 2009. Two cases of scalp white piedra caused by *Trichosporon ovoides*. *Indian Journal of Dermatology, Venereology and Leprology*, 75, p.293.

Taner Yildiran, S., Mehmet Mutlu, F., Ali Saracli, M., Uysal, Y., Gonlum, A., Sobaci, G. and Sutton, D.A., 2006. Fungal endophthalmitis caused by *Aspergillus ustus* in a patient following cataract surgery. *Medical Mycology*, 44(7), pp.665-669.

Tang, P., Mohan, S., Sigler, L., Witterick, I., Summerbell, R., Campbell, I. and Mazzulli, T., 2003. Allergic fungal sinusitis associated with *Trichoderma longibrachiatum*. *Journal of clinical microbiology*, 41(11), pp.5333-5336.

Tang, X., Guo, P., Wong, H., Xie, J., Han, J., Xu, Y. and Zhou, H., 2021. Vacuum-assisted closure and skin grafting combined with amphotericin B for successful treatment of an immunocompromised patient with cutaneous mucormycosis caused by *Mucor irregularis*: a case report and literature review. *Mycopathologia*, 186(3), pp.449-459.

Tap, R.M., Sabaratnam, P., Ramli, N.Y., Hashim, R., Mohd Fuat, A.R., Ng, P.P., Khairam, H. and Ahmad, N., 2016. Subcutaneous infection associated with *Trichosporon ovoides*: a case report and review of literature. *Mycopathologia*, 181, pp.285-290.

Tascini, C., Cardinali, G., Barletta, V., Di Paolo, A., Leonildi, A., Zucchelli, G., Corte, L., Colabella, C., Roscini, L., Consorte, A. and Pasticci, M.B., 2016. First case of *Trichoderma longibrachiatum* CIED (Cardiac Implantable Electronic Device)-associated endocarditis in a non-immunocompromised host: biofilm removal and diagnostic problems in the light of the current literature. *Mycopathologia*, 181, pp.297-303.

Tarkkanen, A., Raivio, V., Anttila, V.J., Tommila, P., Ralli, R., Merenmies, L. and Immonen, I., 2004. Fungal endophthalmitis caused by *Paecilomyces variotii* following cataract surgery: a presumed operating room air-conditioning system contamination. *Acta Ophthalmologica Scandinavica*, 82(2), pp.232-235.

Tavakoli, M., Hedayati, M.T., Mirhendi, H., Nouripour-Sisakht, S., Hedayati, N., Saghafi, F. and Mamishi, S., 2020. The first rare and fatal case of invasive aspergillosis of spinal cord due to *Aspergillus nidulans* in an Iranian child with chronic granulomatosis disease: review of literature. *Current medical mycology*, 6(1), p.55.

Tavanti, A., Davidson, A.D., Gow, N.A., Maiden, M.C. and Odds, F.C., 2005. *Candida orthopsilosis* and *Candida metapsilosis* spp. nov. to replace *Candida parapsilosis* groups II and III. *Journal of clinical microbiology*, 43(1), pp.284-292.

Tendolkar, U., van Diepeningen, A., Joshi, A., Koomen, J., Bradoo, R., Baveja, S. and Agrawal, S., 2015. Rhinosinusitis caused by *Saksenaea erythrospora* in an immunocompetent patient in India: a first report. *JMM Case Reports*, 2(3), p.e000044.

Tendolkar, U., Shinde, A., Baveja, S., Dhurat, R. and Phiske, M., 2014. *Trichosporon inkin* and *Trichosporon mucoides* as unusual causes of white piedra of scalp hair. *Indian Journal of Dermatology, Venereology and Leprology*, 80, p.324.

Thomas, A., Shah, S., Mathews, M. and Chacko, N., 2008. *Apophysomyces elegans*-renal mucormycosis in a healthy host: a case report from south India. *Indian journal of medical microbiology*, 26(3), p.269.

Tien JZ, Chou CH, Ho MW, Chen TT. Lethal mushroom: *volvariella volvacea* infective endocarditis in a patient after allogeneic peripheral blood stem cell transplantation. *J Formos Med Assoc.* 2020;119(2):664–666.

Tirado-Miranda, R., Solera-Santos, J., Brasero, J.C., Haro-Estarriol, M., Cascales-Sanchez, P. and Igualada, J.B., 2001. Septic arthritis due to *Scedosporium apiospermum*: case report and review. *Journal of Infection*, 43(3), pp.210-212.

Todokoro, D., Miyakubo, T., Komori, A., Makimura, K. and Akiyama, H., 2021. A case of contact lens-induced fungal keratitis caused by *Didymella heteroderae*. *Mycopathologia*, 186, pp.309-311.

Tomimori-Yamashita, J., Ogawa, M.M., Hirata, S.H., Fischman, O., Michalany, N.S., Yamashita, H.K. and Alchorne, M., 2002. Mycetoma caused by *Fusarium solani* with osteolytic lesions on the hand: case report. *Mycopathologia*, 153(1), pp.11-14.

Tong, Z., Chen, S.C.A., Chen, L., Dong, B., Li, R., Hu, Z., Jiang, P., Li, D. and Duan, Y., 2013. Generalized subcutaneous phaeohyphomycosis caused by *Phialophora verrucosa*: report of a case and review of literature. *Mycopathologia*, 175, pp.301-306.

Torda, A.J. and Jones, P.D., 1997. Necrotizing cutaneous infection caused by *Curvularia brachyspora* in an immunocompetent host. *Australasian journal of dermatology*, 38(2), pp.85-87.

Torres-Guerrero, E., Martínez-Herrera, E., Arroyo-Camarena, S., Porras, C. and Arenas, R., 2015. Kerion Celsi: A report of two cases due to *Microsporum gypseum* and *Trichophyton tonsurans*. *Our Dermatology Online*, 6(4), p.424.

Toyosawa, Y., Kimura, U., Kurihara, M., Noguchi, H., Matsumoto, T., Hiruma, M., Nakazawa, T., Takamori, K. and Suga, Y., 2022. Kerion Celsi caused by *nannizzia gypsea* in a two-year-old child who had been hospitalized since birth. *Medical mycology journal*, 63(1), pp.21-23.

Trabelsi, S., Hariga, D. and Khaled, S., 2010. First case of *Trichoderma longibrachiatum* infection in a renal transplant recipient in Tunisia and review of the literature. *La Tunisie Medicale*, 88(1), pp.52-57.

Tram QA, Minh NT, Anh DN, Lam NN, Dung TN, Thi Minh Chau N, Tran-Anh L. A rare case of fungal burn wound infection caused by *Fusarium solani* in Vietnam. *Journal of Investigative Medicine High Impact Case Reports*. 2020 Mar;8:2324709620912122.

Treguier, P., David, M., Gargala, G., Camus, V., Stamatoullas, A., Menard, A.L., Lenain, P., Contentin, N., Lemasle, É., Lanic, H. and Tilly, H., 2018. *Cyberlindnera jadinii* (teleomorph *Candida utilis*) candidaemia in a patient with aplastic anaemia: a case report. *JMM Case reports*, 5(8).

Trofa, D., Gácsér, A. and Nosanchuk, J.D., 2008. *Candida parapsilosis*, an emerging fungal pathogen. *Clinical microbiology reviews*, 21(4), pp.606-625.

Trowbridge, J., Ludmer, L.M., Riddle, V.D., Levy, C.S. and Barth, W.F., 1999. *Candida lambica* polyarthritis in a patient with chronic alcoholism. *The Journal of Rheumatology*, 26(8), pp.1846-1848.

Tsang, C.C., Chan, K.F., Chan, W., Chan, J.F., Au-Yeung, R.K., Ngan, A.H., Lin, K.P., Lau, S.K. and Woo, P.C., 2021. Hepatic phaeohyphomycosis due to a novel dematiaceous fungus, *Pleurostoma hongkongense* sp. nov., and importance of antifungal susceptibility testing. *Emerging Microbes & Infections*, 10(1), pp.81-96.

Torda, A.J. and Jones, P.D., 1997. Necrotizing cutaneous infection caused by *Curvularia brachyspora* in an immunocompetent host. *Australasian journal of dermatology*, 38(2), pp.85-87.

Tschopp, J., Perentes, J.Y., Beigelman-Aubry, C., Berezowska, S., Lovis, A., Spertini, O., Bochud, P.Y. and Lamothe, F., 2021. Invasive *Hormoglyphiella aspergillata* infection in patients with acute myeloid leukemia: Report of two cases successfully treated and review of the literature. *Medical Mycology Case Reports*, 32, pp.68-72.

Tse, C., Boodman, C. and Wuerz, T., 2022. *Trichosporon mucoides* prosthetic valve endocarditis managed with antifungal suppression therapy. *Medical Mycology Case Reports*, 36, pp.10-12.

Uenotsuchi, T., Moroi, Y., Urabe, K., Tsuji, G., Kogas, T., Matsuda, T. and Furue, M., 2005. Cutaneous *Scedosporium apiospermum* infection in an immunocompromised patient and a review of the literature. *Acta dermato-venereologica*, 85(2).

Tullio, V., Banche, G., Allizond, V., Roana, J., Mandras, N., Scalas, D., Panzone, M., Cervetti, O., Valle, S., Carlone, N. and Cuffini, A.M., 2010. Non-dermatophyte moulds as skin and nail foot mycosis agents: *Phoma herbarum*, *Chaetomium globosum* and *Microascus cinereus*. *Fungal biology*, 114(4), pp.345-349.

Uhrlaß, S., Mey, S., Storch, S., Wittig, F., Koch, D., Krüger, C. and Nenoff, P., 2021. *Nannizzia incurvata* as a rare cause of favus and tinea corporis in Cambodia and Vietnam. *Indian Journal of Dermatology, Venereology and Leprology*, 87(4), pp.515-521.

Vachharajani, T.J., Zaman, F., Latif, S., Penn, R. and Abreo, K.D., 2005. *Curvularia geniculata* fungal peritonitis: a case report with review of literature. *International urology and nephrology*, 37, pp.781-784.

Vagefi, M.R., Kim, E.T., Alvarado, R.G., Duncan, J.L., Howes, E.L. and Crawford, J.B., 2005. Bilateral endogenous *Scedosporium prolificans* endophthalmitis after lung transplantation. *American journal of ophthalmology*, 139(2), pp.370-373.



Vagefi, P.A., Cosimi, A.B., Ginns, L.C. and Kotton, C.N., 2008. Cutaneous Aspergillus ustus in a lung transplant recipient: emergence of a new opportunistic fungal pathogen. The Journal of heart and lung transplantation, 27(1), pp.131-134.

Vahidi, S., Beckman, A., Albrecht, K., Arbefeville, S., Ferrieri, P. and Amin, K., 2018. Urinary tract blastomycosis diagnosed by urine cytology. Diagnostic Cytopathology, 46(8), pp.698-701.

Valari, M., Stathi, A., Petropoulou, T., Kakourou, T., Pangali, A. and Arabatzis, M., 2012. Cases of Tinea capitis due to pale isolates of Trichophyton violaceum (Trichophyton glabrum) in South-East Europe. A challenge to the clinical laboratory. Medical mycology case reports, 1(1), pp.66-68.

Vallabhaneni, S., Kallen, A., Tsay, S., Chow, N., Welsh, R., Kerins, J., Kemble, S.K., Pacilli, M., Black, S.R., Landon, E. and Ridgway, J., 2016. Investigation of the first seven reported cases of Candida auris, a globally emerging invasive, multidrug-resistant fungus—United States, May 2013–August 2016. Morbidity and Mortality Weekly Report, 65(44), pp.1234-1237.

Van Etta, L.L., Peterson, L.R. and Gerding, D.N., 1983. Acremonium falciforme (Cephalosporium falciforme): Mycetoma in a renal transplant patient. Archives of dermatology, 119(8), pp.707-708.

Venkateshwar, S., Ambroise, M.M., Asir, G.J., Mudhigeti, N., Ramdas, A., Authy, K., Shivaprakash, M.R. and Kanungo, R., 2014. A rare case report of subcutaneous phaeohyphomycotic cyst caused by Exophiala oligosperma in an immunocompetent host with literature review. Mycopathologia, 178, pp.117-121.

Vásquez-del-Mercado, E., Lammoglia, L. and Arenas, R., 2013. Subcutaneous phaeohyphomycosis due to Curvularia lunata in a renal transplant patient. Revista Iberoamericana de Micología, 30(2), pp.116-118.

Valle, A.C.F.D., Wanke, B., LazÉra, M.D.S., Monteiro, P.C.F. and Viegas, M.D.L., 2001. Entomophthoromycosis by Conidiobolus coronatus. Report of a case successfully treated with the combination of itraconazole and fluconazole. Revista do Instituto de Medicina Tropical de São Paulo, 43, pp.233-236.

Vazquez-Lopez, F., Palacios-Garcia, L. and Argenziano, G., 2011. Dermoscopic corkscrew hairs dissolve after successful therapy of Trichophyton violaceum tinea capitis: A case reportajd\_850 118.. 119. Australasian journal of dermatology, 53, pp.118-119.

Vecilla, D.F. and Laredo, C.S., Corneal abscess caused by Filobasidium uniguttulatum. Case report and literature review on cryptococcal keratitis. Revista espanola de quimioterapia: publicacion oficial de la Sociedad Espanola de Quimioterapia, p.fernandez12dec2023.

Vega, W., Orellana, M., Zaror, L., Gené, J. and Guarro, J., 2006. Saksenaea vasiformis infections: case report and literature review. Mycopathologia, 162, pp.289-294.

Velázquez, R., Muñoz-Hernández, B., Arenas, R., Taylor, M.L., Hernández-Hernández, F., Manjarrez, M.E. and López-Martínez, R., 2003. An imported case of Blastomyces dermatitidis infection in Mexico. Mycopathologia, 156(4), pp.263-267.

Valenza, G., Valenza, R., Brederlau, J., Frosch, M. and Kurzai, O., 2006. Identification of Candida fabianii as a cause of lethal septicaemia. Mycoses, 49(4), pp.331-334.

Valeriano, C.A.T., Ferraz, C.E., Oliveira, M.M.E., Inácio, C.P., de Oliveira, E.P., Lacerda, A.M., Neves, R.P. and de Lima-Neto, R.G., 2020. Cat-transmitted disseminated cutaneous sporotrichosis caused by Sporothrix brasiliensis in a new endemic area: Case series in the northeast of Brazil. JAAD Case Reports, 6(10), pp.988-992.

Venditti, M., Micozzi, A., Gentile, G., Polonelli, L., Morace, G., Bianco, P., Avvisati, G., Papa, G. and Martino, P., 1988. Invasive Fusarium solani infections in patients with acute leukemia. Reviews of infectious diseases, 10(3), pp.653-660.

R. Verma, B. Vasudevan, S. Badwal, R. Sriram, S. Neema, V. Kharayat, Rare case of subcutaneous mycosis with intrathoracic extension due to *Chaetomium strumarium*, *Clinical and Experimental Dermatology*, Volume 40, Issue 6, 1 August 2015, Pages 622–625, <https://doi.org/10.1111/ced.12604>

Vermeulen, E., Maertens, J., Meersseman, P., Saegeman, V., Dupont, L. and Lagrou, K., 2014. Invasive *Aspergillus niger* complex infections in a Belgian tertiary care hospital. *Clinical Microbiology and Infection*, 20(5), pp.O333-O335.

Vervaeke, S., Vandamme, K., Boone, E., De Laere, E., Swinne, D. and Surmont, I., 2008. A case of *Candida lambica* fungemia misidentified as *Candida krusei* in an intravenous drug abuser. *Sabouraudia*, 46(8), pp.853-856.

Vieira, M.R., Milheiro, A. and Pacheco, F.A., 2001. *Phaeohyphomycosis* due to *Cladosporium cladosporioides*. *Sabouraudia*, 39(1), pp.135-137.

Vijaya, D., 2001. Keratomycosis due to *Fusarium oxysporum*--a case report. *Indian journal of pathology & microbiology*, 44(3), pp.337-338.

Villanueva, D.M., Venkatesan, B. and Figueroa, N., 2022. *Cladosporium sphaerospermum* as a Rare Cause of Pneumonia. *Cureus*, 14(6).

Villanueva-Lozano, H., Trevino-Rangel, R.D.J., Renpenning-Carrasco, E.W. and González, G.M., 2017. Successful treatment of *Talaromyces amestolkiae* pulmonary infection with voriconazole in an acute lymphoblastic leukemia patient. *Journal of infection and chemotherapy*, 23(6), pp.400-402.

Vinh, D.C., Shea, Y.R., Jones, P.A., Freeman, A.F., Zelazny, A. and Holland, S.M., 2009b. Chronic invasive aspergillosis caused by *Aspergillus viridinutans*. *Emerging infectious diseases*, 15(8), p.1292.

Vismer, H.F., Marasas, W.F.O., Rheeder, J.P. and Joubert, J.J., 2002. *Fusarium dimerum* as a cause of human eye infections. *Medical mycology*, 40(4), pp.399-406.

Vinh, D.C., Shea, Y.R., Sugui, J.A., Parrilla-Castellar, E.R., Freeman, A.F., Campbell, J.W., Pittaluga, S., Jones, P.A., Zelazny, A., Kleiner, D. and Kwon-Chung, K.J., 2009a. Invasive aspergillosis due to *Neosartorya udagawae*. *Clinical infectious diseases*, 49(1), pp.102-111.

Vogelzang, E.H., Weersink, A.J., Van Mansfeld, R., Chow, N.A., Meis, J.F. and Van Dijk, K., 2019. The first two cases of *Candida auris* in The Netherlands. *Journal of Fungi*, 5(4), p.91.

Vyas, D.H. and Shah, P.D., 2011. A case of otomycosis caused by *Lichtheimia corymbifera* (syn. *Absidia corymbifera*, *Mycocladius corymbifer*) in a healthy immunocompetent individual. *Indian Journal of Otolaryngology*, 17(1), p.33.

Wagoner, M.D., Badr, I.A. and Hidayat, A.A., 1999. *Chrysosporium parvum* keratomycosis. *Cornea*, 18(5), pp.616-620.

Walker, S.D., Clark, R.V., King, C.T., Humphries, J.E., Lytle, L.S. and Butkus, D.E., 1992. Fatal disseminated *Conidiobolus coronatus* infection in a renal transplant patient. *American journal of clinical pathology*, 98(6), pp.559-564.

Walker, K., Skelton, H. and Smith, K., 2002. Cutaneous lesions showing giant yeast forms of *Blastomyces dermatitidis*. *Journal of cutaneous pathology*, 29(10), pp.616-618.

Walkty, A., Keynan, Y., Karlowsky, J., Dhaliwal, P. and Embil, J., 2018. Central nervous system blastomycosis diagnosed using the MVista® *Blastomyces* quantitative antigen enzyme immunoassay test on cerebrospinal fluid: a case report and review of the literature. *Diagnostic Microbiology and Infectious Disease*, 90(2), pp.102-104.

Wankhade, A., SAhu, V., ShArma, P. and DAS, P., 2021. Keratitis due to a rare fungus *Colletotrichum dematium*: a case report. *J Clin Diag Res*, 15, pp.3-5.

Wang, J., Li, L., Xiao, J., Zhu, M. and Zhang, Q., 2003. Subcutaneous *Phaeohyphomycosis* Caused by *Curvularia clavata*: The First Case Report in China. *Chinese Journal of Dermatology*.

Wang, D.L., Nishimura, K. and Miyaji, M., 1991. Taxonomy and identification of *Exophiala dermatitidis*. *Chin J Dermatol*, 24, pp.22-23.

Wang, X., Qu, Y., Yang, Z., Zhang, T., Feng, Y., Li, D., Yan, H. and Shi, D., 2023. Surgery plus photodynamic therapy for a diabetic patient with cutaneous infectious granuloma caused by *Curvularia lunata*. *Photodiagnosis and Photodynamic Therapy*, 41, p.103253.

Wang, H.P., Yen, Y.F., Chen, W.S., Chou, Y.L., Tsai, C.Y., Chang, H.N. and Chou, C.T., 2007. An unusual case of *Candida tropicalis* and *Candida krusei* arthritis in a patient with acute myelogenous leukemia before chemotherapy. *Clinical rheumatology*, 26(7), pp.1195-1197.

Wang, P., Kenyon, C., de Hoog, S., Guo, L., Fan, H., Liu, H., Li, Z., Sheng, R., Yang, Y., Jiang, Y. and Zhang, L., 2017. A novel dimorphic pathogen, *Emergomyces orientalis* (Onygenales), agent of disseminated infection. *Mycoses*, 60(5), pp.310-319.

Watanabe, M., Hayama, K., Fujita, H., Yagoshi, M., Yarita, K., Kamei, K. and Terui, T., 2016. A case of sporotrichosis caused by *sporothrix globosa* in Japan. *Annals of Dermatology*, 28(2), pp.251-252.

Weers-Pothoff, G., Havermans, J.F., Kamphuis, J., Sinnige, H.A.M. and Meis, J.F.G.M., 1997. *Candida tropicalis* arthritis in a patient with acute myeloid leukemia successfully treated with fluconazole: case report and review of the literature. *Infection*, 25(2), pp.109-111.

Weissgold, D.J., Orlin, S.E., Sulewski, M.E., Frayer, W.C. and Eagle Jr, R.C., 1998. Delayed-onset fungal keratitis after endophthalmitis. *Ophthalmology*, 105(2), pp.258-262.

Wen, Y.M., Rajendran, R.K., Lin, Y.F., Kirschner, R. and Hu, S., 2016. Onychomycosis associated with *Exophiala oligosperma* in Taiwan. *Mycopathologia*, 181, pp.83-88.

Werbil, W.A., Baroncelli, R., Shoham, S. and Zhang, S.X., 2019. Angioinvasive, cutaneous infection due to *Colletotrichum siamense* in a stem cell transplant recipient: Report and review of prior cases. *Transplant Infectious Disease*, 21(5), p.e13153.

Wheat, L.J., Connolly-Stringfield, P., Blair, R., Connolly, K., Garringer, T., Katz, B.P. and Gupta, M., 1992. Effect of successful treatment with amphotericin B on *Histoplasma capsulatum* variety *capsulatum* polysaccharide antigen levels in patients with AIDS and histoplasmosis. *The American journal of medicine*, 92(2), pp.153-160.

Wilhelmus, K.R. and Jones, D.B., 2001. *Curvularia* keratitis. *Transactions of the American Ophthalmological Society*, 99, p.111.

Williams, P.L., Johnson, R., Pappagianis, D., Einstein, H., Slager, U., Koster, F.T., Eron, J.J., Morrison, J., Aguet, J. and River, M.E., 1992. Vasculitic and encephalitic complications associated with *Coccidioides immitis* infection of the central nervous system in humans: report of 10 cases and review. *Clinical infectious diseases*, 14(3), pp.673-682.

Williamson, J.D., Silverman, J.F., Mallak, C.T. and Christie, J.D., 1996. Atypical cytomorphologic appearance of *Cryptococcus neoformans*: a report of five cases. *Acta cytologica*, 40(2), pp.363-370.

Williamson, D., Pandey, S., Taylor, S., Rogers, K., Storey, L., Marshall, M.R. and Holland, D., 2011. A case of infection caused by the basidiomycete *Phellinus undulatus*. *Journal of medical microbiology*, 60(2), pp.256-258.

Wisuthsarewong, W., Chaiprasert, A. and Viravan, S., 1996. Outbreak of *Tinea capitis* caused by *Microsporum ferrugineum* in Thailand. *Mycopathologia*, 135, pp.157-161.

Wolkow, N., Jakobiec, F.A., Stagner, A.M., Cunnane, M.E., Piantadosi, A.L., Basgoz, N. and Lefebvre, D., 2017. Chronic orbital and calvarial fungal infection with *Apophysomyces variabilis* in an immunocompetent patient. *Survey of Ophthalmology*, 62(1), pp.70-82.

Wong, B., Kiehn, T.E., Edwards, F., Bernard, E.M., Marcove, R.C., De Harven, E. and Armstrong, D., 1982. Bone infection caused by *Debaryomyces hansenii* in a normal host: a case report. *Journal of clinical microbiology*, 16(3), pp.545-548.

Wongkamhla, T., Chongtrakool, P. and Jitmuang, A., 2019. A case report of *Talaromyces marneffe* Oro-pharyngo-laryngitis: a rare manifestation of Talaromycosis. *BMC Infectious Diseases*, 19, pp.1-6.

Woo, P.C., Ngan, A.H., Tsang, C.C., Ling, I.W., Chan, J.F., Leung, S.Y., Yuen, K.Y. and Lau, S.K., 2013. Clinical spectrum of *Exophiala* infections and a novel *Exophiala* species, *Exophiala hongkongensis*. *Journal of Clinical Microbiology*, 51(1), pp.260-267.

Wu, Z., Ying, H., Yiu, S., Irvine, J. and Smith, R., 2002. Fungal keratitis caused by *Scedosporium apiospermum*: report of two cases and review of treatment. *Cornea*, 21(5), pp.519-523.

Wu, P.C., Lai, C.H., Tan, H.Y., Ma, D.H. and Hsiao, C.H., 2010. The successful medical treatment of a case of *Paecilomyces lilacinus* keratitis. *Cornea*, 29(3), pp.357-358.

Wu, Y., Wang, J., Li, W., Jia, H., Che, J., Lu, J., Liu, L. and Cheng, Y., 2013. *Pichia fabianii* blood infection in a premature infant in China: case report. *BMC Research Notes*, 6(1), pp.1-4.

Wu, Z., Ying, H., Yiu, S., Irvine, J. and Smith, R., 2002. Fungal keratitis caused by *Scedosporium apiospermum*: report of two cases and review of treatment. *Cornea*, 21(5), pp.519-523.

Wüppenhorst, N., Lee, M.K., Rappold, E., Kayser, G., Beckervordersandforth, J., de With, K. and Serr, A., 2010. Rhino-orbitocerebral zygomycosis caused by *Conidiobolus incongruus* in an immunocompromised patient in Germany. *Journal of clinical microbiology*, 48(11), pp.4322-4325.

Wylen, E.L. and Nanda, A., 1999. *Blastomyces dermatitidis* occurring as an isolated cerebellar mass. *Neurosurgical review*, 22(2), pp.152-154.

Wynne, S.M., Kwon-Chung, K.J., Shea, Y.R., Filie, A.C., Varma, A., Lupo, P. and Holland, S.M., 2004. Invasive infection with *Trichosporon inkin* in 2 siblings with chronic granulomatous disease. *Journal of allergy and clinical immunology*, 114(6), pp.1418-1424.

Xess, I., N. Jain, F. Hasan, P. Mandal, and U. Banerjee.2007. Epidemiology of candidemia in a tertiary care centre of north India: 5-year study. *Infection*35:256-259.

Xi, L., Lu, C., Sun, J., Li, X., Liu, H., Zhang, J., Xie, Z. and Hoog, G.D., 2009. Chromoblastomycosis caused by a meristematic mutant of *Fonsecaea monophora*. *Medical Mycology*, 47(1), pp.77-80.

Xia, Z.K., Wang, W.L. and Yang, R.Y., 2013. Slowly progressive cutaneous, rhinofacial, and pulmonary mucormycosis caused by *Mucor irregularis* in an immunocompetent woman. *Clinical infectious diseases*, 56(7), pp.993-995.

Xia, X.J., Shen, H. and Liu, Z.H., 2015. Primary cutaneous mucormycosis caused by *Mucor irregularis*. *Clinical and Experimental Dermatology*, 40(8), pp.875-878.

Xiujiao, X., Hong, S. and Ai-e, X., 2012. Eumycetoma due to *Acremonium falciforme* acquired in China. *Mycoses*, 55(2), pp.e4-e7.

Xue, X., Deng, H., Zhao, L., Zang, X., Asuquo, I.P., Meng, M., Ma, X., Qin, C., Meng, Y., Wu, C. and Gao, J., 2020. Cryptococcosis caused by *Cryptococcus gattii*: 2 case reports and literature review. *Medicine*, 99(50).

Yagi, K., Ushikubo, M., Maeshima, A., Konishi, M., Fujimoto, K., Tsukamoto, M., Araki, K., Kamei, K., Oyamada, Y. and Oshima, H., 2019. Invasive pulmonary aspergillosis due to *Aspergillus lentulus* in an adult patient: a case report and literature review. *Journal of Infection and Chemotherapy*, 25(7), pp.547-551.

Yamairi, K., Ido, K., Nakamura, S., Niki, M., Imoto, W., Shibata, W., Namikawa, H., Fujimoto, H., Yamada, K., Nakamae, H. and Hino, M., 2019. Successful treatment of invasive pulmonary aspergillosis caused by *Aspergillus felis*, a cryptic species within the *Aspergillus* section *Fumigati*: a case report. *Journal of Infection and Chemotherapy*, 25(4), pp.307-310.

Yamaguchi, S., Okubo, Y., Katano, A., Sano, A., Uezato, H. and Takahashi, K., 2015. Primary cutaneous mucormycosis caused by *Mucor irregularis* in an elderly person. *The Journal of Dermatology*, 42(2), pp.210-214.

Yamamoto, Y., Osanai, S., Fujiuchi, S., Yamazaki, K., Nakano, H., Ohsaki, Y. and Kikuchi, K., 2002. Extrinsic allergic alveolitis induced by the yeast *Debaryomyces hansenii*. *European Respiratory Journal*, 20(5), pp.1351-1353.

Yamamoto, S., Ikeda, M., Ohama, Y. *et al.* *Aureobasidium melanigenum* catheter-related bloodstream infection: a case report. *BMC Infect Dis* **22**, 335 (2022). <https://doi.org/10.1186/s12879-022-07310-9>

Yasuda-Sekiguchi, F., Kamata, A., Hosokawa, R., Kouno, M., Takahashi, S., Yaguchi, T., Aoyama, K. and Sato, T., 2022. A Case of Kerion Celsi Caused by *Trichophyton tonsurans*, a Plate Culture of Which Showed Yellow-Green Fluorescence Under UVA Light. *Medical Mycology Journal*, 63(2), pp.37-41.

Yang, S., Shan, B., Fan, D. *et al.* Tinea Cruris Caused by *Naganishia diffluens*. *Mycopathologia* **188**, 837–839 (2023). <https://doi.org/10.1007/s11046-023-00778-2>

Yegneswaran, P.P., Pai, V., Bairy, I. and Bhandary, S., 2010. Colletotrichum graminicola keratitis: first case report from India. *Indian Journal of Ophthalmology*, 58(5), p.415.

Yera, H., Bougnoux, M.E., Jeanrot, C., Baixench, M.T., De Pinieux, G. and Dupouy-Camet, J., 2003. Mycetoma of the foot caused by *Fusarium solani*: identification of the etiologic agent by DNA sequencing. *Journal of clinical microbiology*, 41(4), pp.1805-1808.

Yoshida, H., Seki, M., Umeyama, T., Urai, M., Kinjo, Y., Nishi, I., Toyokawa, M., Kaneko, Y., Ohno, H., Miyazaki, Y. and Tomono, K., 2015. Invasive pulmonary aspergillosis due to *Aspergillus lentulus*: successful treatment of a liver transplant patient. *Journal of Infection and Chemotherapy*, 21(6), pp.479-481.

You, Z., Yang, X., Yu, J., Zhang, J. and Ran, Y., 2019. Chromoblastomycosis caused by *Fonsecaea nubica*: first report in northern China and literature review. *Mycopathologia*, 184, pp.97-105.

Young, E.J., Hirsh, D.D., Fainstein, V. and Williams, T.W., 1980. Pleural effusions due to *Cryptococcus neoformans*: a review of the literature and report of two cases with cryptococcal antigen determinations. *American Review of Respiratory Disease*, 121(4), pp.743-747.

Yu, J., Chen, W., Wan, Z. and Li, R.Y., 2004. Adult tinea capitis due to *Trichophyton violaceum* in China. *Mycopathologia*, 157(1), pp.49-52.

Yu, S.Y., Guo, L.N., Xiao, M., Zhou, M.L., Yuan, Y., Wang, Y., Zhang, L., Sun, T.S., Ning, Y.T., Jia, P.Y. and Kang, W., 2020. Clinical and microbiological characterization of invasive pulmonary aspergillosis caused by *Aspergillus lentulus* in China. *Frontiers in microbiology*, 11, p.1672.

Yun, S.J., Shin, M.G., Choi, C., Kim, H.J., Lee, J.B., Kim, S.J., Lee, S.C. and Won, Y.H., 2007. Fatal disseminated angioinvasive *Fusarium falciforme* infection in a patient with acute myeloid leukaemia. *British Journal of Dermatology*, 157(2), pp.407-409.

Yusuf, N.W., Assaf, H.M. and Rotowa, N.A., 2003. Invasive gastrointestinal *Basidiobolus ranarum* infection in an immunocompetent child. *The Pediatric infectious disease journal*, 22(3), pp.281-282.

Zahra, L.V., Mallia, D., Hardie, J.G., Bezzina, A. and Fenech, T., 2002. Case report. Keratomycosis due to *Alternaria alternata* in a diabetic patient. *Mycoses*, 45(11-12), pp.512-514.

Zarei, F., Mahmoudi, S., Amanizadeh, A. and Afshari, S.A.K., 2023. First report of onychomycosis caused by *Phoma glomerata* (*Didymella glomerata*): case report and literature review. *Reviews and Research in Medical Microbiology*, 34(1), pp.1-5.

Zghair, F.S., 2020. First record of *Cyberlindnera fabianii* that causes Vulvovaginitis in Iraq. *EurAsian Journal of BioSciences*, 14(1).

Zhang, J., Xi, L., Lu, C., Li, X., Xie, T., Zhang, H., Xie, Z. and Sybren, D.H., 2009. Successful treatment for chromoblastomycosis caused by *Fonsecaea monophora*: a report of three cases in Guangdong, China. *Mycoses*, 52(2), pp.176-181.

Zhang, R., Zhang, J.W. and Szerlip, H.M., 2002. Endocarditis and hemorrhagic stroke caused by *Cunninghamella bertholletiae* infection after kidney transplantation. *American journal of kidney diseases*, 40(4), pp.842-846.

Zhang, H., Ran, Y., Liu, Y., Zhang, R., Lin, X., Yan, W. and Dai, Y., 2009. *Arthroderma vanbreuseghemii* infection in three family members with kerion and tinea corporis. *Medical Mycology*, 47(5), pp.539-544.

Zhang, Y., Mijiti, J., Huang, C., Song, Y., Wan, Z., Li, R., Kang, X. and Wang, X., 2019. Deep dermatophytosis caused by *Microsporum ferrugineum* in a patient with CARD9 mutations. *British Journal of Dermatology*, 181(5), pp.1093-1095.

Zaitz, C., Porto, E., Heins-Vaccari, E.M., Sadahiro, A., Ruiz, L.R.B., Müller, H. and Lacaz, C.D.S., 1995. Subcutaneous hyalohyphomycosis caused by *Acremonium recifei*: case report. *Revista do Instituto de Medicina Tropical de São Paulo*, 37, pp.267-270.

Zareei, M., Zibafar, E., Daie Ghazvini, R., Geramishoar, M., Borjian Borujeni, Z., Hossein Pour, L. and Jamal Hashemi, S., 2013. Proximal onychomycosis due to *Malassezia furfur*: a case report. *Tehran University Medical Journal*, 70(12).

Zhu Y, Shan Y, Fan S, Li J, Liu X. *Candida parapsilosis sensu stricto* and the closely related species *Candida orthopsilosis* and *Candida metapsilosis* in vulvovaginal candidiasis. *Mycopathologia*. 2015 Feb;179:111-8.

Zoutman, D.E. and Sigler, L., 1991. Mycetoma of the foot caused by *Cylindrocarpon destructans*. *Journal of clinical Microbiology*, 29(9), pp.1855-1859.

Zuo, Q., Dong, L., Mu, W., Zhou, L., Hu, T. and Zhang, H., 2015. *Trichosporon asahii* infection after total knee arthroplasty: a case report and review of the literature. *Canadian Journal of Infectious Diseases and Medical Microbiology*, 26, pp.47-51.

Yu, J., Yang, S., Zhao, Y. and Li, R., 2006. A case of subcutaneous phaeohyphomycosis caused by *Chaetomium globosum* and the sequences analysis of *C. globosum*. *Medical mycology*, 44(6), pp.541-545.

Zhang, H., Ran, Y., Li, D. et al. *Clavispora lusitaniae* and *Chaetomium atrobrunneum* as Rare Agents of Cutaneous Infection. *Mycopathologia* 169, 373–380 (2010). <https://doi.org/10.1007/s11046-009-9266-9>

Zaitz, C., Heins-vaccari, E.M., Freitas, R.S.D., Arriagada, G.L.H., Ruiz, L., Totoli, S.A., Marques, A.C., Rezze, G.G., Muller, H., Valente, N.S. and Lacaz, C.D.S., 1997. Subcutaneous pheohyphomycosis caused by *Phoma cava*: report of a case and review of the literature. *Revista do Instituto de Medicina Tropical de São Paulo*, 39, pp.43-48.

Zhang, S., Wang, L., Han, Q. *et al.* Lung cancer coexisting with *Papiliotrema flavescens* infection diagnosed by next-generation sequencing: a case report. *BMC Infect Dis* **22**, 684 (2022). <https://doi.org/10.1186/s12879-022-07591-0>

Zayit-Soudry, S., Neudorfer, M., Barak, A., Loewenstein, A., Bash, E. and Siegman-Igra, Y., 2005. Endogenous *Phialemonium curvatum* endophthalmitis. *American journal of ophthalmology*, 140(4), pp.755-757.

Zhou, Y.B., Chen, P., Sun, T.T., Wang, X.J. and Li, D.M., 2016. Acne-like subcutaneous phaeohyphomycosis caused by *Cladosporium cladosporioides*: a rare case report and review of published literatures. *Mycopathologia*, 181, pp.567-573.
